# Supplementary material for: Exploring Medicinal Mechanism of Baicalin in Tumor Microenvironment of Melanoma via Bioinformatic and In Vitro Study
Source: Research Square preprint supplement (doi:10.21203/rs.3.rs-7498099/v1), 2025-10-31
Supplement: Supplementary file 1 [file 0364407f7c94f0358f0a0c40.xlsx]

## Sheet: S1
The clinical characteristics of SKCM patients
Age			Sex			Race
Variable	Case	Ratio(%)	Variable	Case	Ratio(%)	Variable	Case	Ratio(%)
<65	289	61.62%	Male	289	61.62%	white	446	0.951
≥65	172	36.67%	Female	180	38.38%	asian	12	0.0256
NA	8	1.71%				black	1	0.0021
						NA	10	0.0213
TNM--T			TNM--N			TNM--M			Stage
Variable	Case	Ratio(%)	Variable	Case	Ratio(%)	Variable	Case	Ratio(%)	Variable	Case	Ratio(%)
T0	23	4.9%	Nx	36	7.68%	M0	417	88.91%	0	7	1.49%
Tx	47	10.02%	N0	235	50.11%	M1	24	5.12%	I	77	16.42%
Tis	8	1.71%	N1	74	15.78%	NA	28	5.97%	II	140	29.85%
T1	42	8.96%	N2	49	10.45%				III	170	36.25%
T2	78	16.63%	N3	54	11.51%				IV	23	4.9%
T3	90	19.19%	NA	21	4.48%				NA	52	11.09%
T4	152	32.41%
NA	29	6.18%

## Sheet: S2
Targets of baicalin								Targets of melanoma
target	swiss	super	ChEMBL	genecard	CTD	ETCM		target	genecard	disgnet
AKR1B1	1	0	1	1	0	0		CDKN2A	1	1
ADORA1	1	0	0	0	0	0		CDK4	1	1
TNF	1	0	0	1	1	0		MC1R	1	1
IL2	1	0	1	0	0	0		BRAF	1	1
XDH	1	0	0	1	1	0		MITF	1	1
PTGS2	1	0	0	1	1	0		POT1	1	1
RPS6KA3	1	1	0	0	0	0		NRAS	1	1
EGFR	1	0	0	1	1	0		TP53	1	1
ACHE	1	1	0	0	1	0		BAP1	1	1
NQO2	1	0	0	0	0	1		KIT	1	1
NMUR2	1	0	0	0	0	0		PTEN	1	1
ADRA2A	1	0	0	0	0	0		GNA11	1	1
ADRA2C	1	0	0	0	0	0		CTNNB1	1	1
NOX4	1	0	0	0	0	0		GNAQ	1	1
ALDH2	1	0	0	0	0	0		HRAS	1	1
CA2	1	0	1	0	0	1		LOC130001603	1	0
CA12	1	0	0	0	0	1		TYR	1	1
FDFT1	1	0	0	0	0	0		TERT	1	1
MAPK14	1	0	0	1	0	0		MAP2K1	1	1
IMPDH2	1	1	0	0	0	0		PIK3CA	1	1
NEU2	1	0	0	0	0	0		AKT1	1	1
POLA1	1	0	0	0	0	0		STK11	1	1
CA13	1	0	0	0	0	0		RAF1	1	1
ASNS	1	0	0	0	0	0		SF3B1	1	1
HPRT1	1	0	0	0	0	0		LOC126806658	1	0
CD38	1	0	0	0	0	0		TSPAN31	1	0
P2RY1	1	0	0	0	0	0		KRAS	1	1
FPGS	1	0	0	0	0	0		SLC45A2	1	1
MGAM	1	0	0	0	0	0		LRRC56	1	0
ALOX5	1	0	0	1	1	0		CDKN2B-AS1	1	1
GAA	1	0	0	0	0	0		MAP2K2	1	1
FGF2	1	0	0	0	0	0		MYC	1	1
CA1	1	0	0	0	0	1		EZH2	1	1
CA9	1	0	0	0	0	1		RAC1	1	1
HK2	1	0	0	0	0	0		ERBB2	1	1
HK1	1	0	0	0	0	0		CDKN2B	1	1
POLD1	1	0	0	0	0	0		PMEL	1	1
EGLN1	1	0	0	0	0	0		CMM	1	1
POLB	1	0	0	0	0	0		CHEK2	1	1
POLG	1	0	0	0	0	0		MCAM	1	1
KDM5A	1	0	0	0	0	0		MGMT	1	1
TYMS	1	0	0	0	0	0		BRCA2	1	1
P2RY4	1	0	0	0	0	0		ARAF	1	1
P2RY2	1	0	0	0	0	0		SAMMSON	1	1
P2RY6	1	0	0	0	0	0		MIR211	1	1
KCNA3	1	0	0	0	0	0		MAGEA3	1	1
CASP3	1	0	0	1	1	0		MALAT1	1	1
ITPR1	1	0	0	0	0	0		MAGEA1	1	1
NEU4	1	0	0	0	0	0		MTOR	1	1
MAG	1	0	0	0	0	0		RMEL3	1	0
FOLR1	1	0	0	0	0	0		FBXW7	1	1
GART	1	0	0	0	0	0		CXCL8	1	1
SELP	1	0	0	0	0	0		ERBB4	1	1
MMP16	1	0	0	0	0	0		PLCB4	1	1
MMP1	1	0	0	0	0	0		MLANA	1	1
MMP14	1	0	0	0	0	0		MBD4	1	0
MMP8	1	0	0	1	0	0		PDGFRA	1	1
FOLH1	1	0	0	0	0	0		MIRLET7B	1	1
EIF4E	1	0	0	0	0	0		LOC110806263	1	1
NPC1L1	1	0	0	0	0	0		PIK3R1	1	0
AMY2A	1	0	0	0	0	0		STK19	1	1
KDM4D	1	0	0	0	0	0		MIA	1	1
KDM4C	1	0	0	0	0	0		PPP6C	1	1
ABCB1	1	0	0	1	0	0		MIR17	1	1
CASP6	1	0	0	0	0	0		B2M	1	1
CASP7	1	0	0	0	0	0		MIR193B	1	0
CASP8	1	0	0	0	0	0		MIR149	1	1
CASP1	1	0	0	1	1	0		IDH1	1	1
CASP2	1	0	0	0	0	0		IL2	1	1
DNMT1	1	0	0	0	0	1		MIR200A	1	1
F10	1	0	0	0	0	0		MIR140	1	0
DNMT3B	1	0	0	0	0	0		PVT1	1	1
ANPEP	1	0	0	0	0	0		BANCR	1	1
ERAP2	1	0	0	0	0	0		PRAME	1	1
DHFR	1	0	1	0	0	0		STAT1	1	1
PTPN22	1	0	0	0	0	0		PAUPAR	1	0
YARS1	0	0	0	0	0	0		CREBBP	1	0
SQLE	1	0	0	0	0	1		H19	1	0
ADCY10	1	0	0	0	0	0		TYRP1	1	1
CA7	1	0	0	0	0	1		GNAS	1	1
CA4	1	0	0	0	0	1		TERF2IP	1	1
CAPN1	1	1	0	0	0	0		CMM4	1	0
ITGB3	0	0	0	0	0	0		CYSLTR2	1	0
ITGAV	0	0	0	0	0	0		MIR19A	1	0
NEU3	1	0	0	0	0	0		MEG3	1	1
PIK3CA	1	0	0	0	0	0		CASC15	1	1
ATIC	1	0	0	0	0	0		AIM2	1	1
CMA1	1	0	0	0	0	0		GAS5	1	1
IDO1	1	0	0	0	0	0		XIST	1	0
SIGMAR1	1	0	0	0	0	0		LOC130008148	1	0
DRD2	1	0	0	0	0	0		MIR34A	1	1
ENPEP	1	0	0	0	0	0		CNOT9	1	0
LAP3	1	0	0	0	0	0		MIR34C	1	0
P2RY11	1	0	0	0	0	0		LINC00673	1	0
NAALAD2	1	0	0	0	0	0		MIR205	1	1
ERAP1	1	1	0	0	0	0		COL17A1	1	1
ITGA4	0	0	0	0	0	0		BAGE	1	1
ITGB1	0	0	0	1	0	0		MIR182	1	1
ADORA2B	1	0	0	0	0	0		SPRY4-IT1	1	1
HDAC3	1	0	0	0	0	0		MIR31	1	1
HDAC6	1	0	0	0	0	0		MIR23B	1	0
HDAC2	1	0	0	0	0	0		MIR193A	1	0
TDP1	0	1	0	0	0	0		MIR204	1	1
APEX1	0	1	0	0	0	0		MIR221	1	1
CTSD	0	1	0	0	0	0		CMM7	1	0
TOP2A	0	1	0	0	0	1		MIR137	1	1
ALOX12	0	1	0	0	0	0		MIR222	1	1
KLF5	0	1	0	0	0	0		LINC-ROR	1	0
MAOA	0	1	0	0	0	0		DNMT3A	1	1
TRIM24	0	1	0	0	0	0		PALB2	1	1
DUSP3	0	1	0	0	0	0		SNHG5	1	0
RORB	0	1	0	0	0	0		XRCC3	1	1
SLC6A5	0	1	1	0	0	0		MIR183	1	1
CHRM5	0	1	0	0	0	0		MIR210	1	0
TTR	0	1	0	0	0	0		MIR200C	1	1
HPGD	0	1	0	0	0	0		MELTF	1	1
HIF1A	0	1	0	1	0	0		CCND1	1	1
CAMKK2	0	1	0	1	0	0		MIR34B	1	0
CHRM1	0	1	1	0	0	0		MIR200B	1	1
GLRA1	0	1	0	0	0	0		UCA1	1	1
NR1I2	0	1	0	0	0	1		CDKN1A	1	1
CSNK2B	0	1	0	0	0	1		ACD	1	1
HSD17B10	0	1	0	0	0	0		HOTAIR	1	1
NTRK3	0	1	0	0	0	0		MIR106A	1	0
SERPINE1	0	1	0	0	0	0		MIR100	1	0
GRIN1	0	1	1	0	0	0		S100B	1	1
ADAM10	0	1	0	0	0	0		IL24	1	1
F13A1	0	1	0	0	0	0		MIR15A	1	0
CACNA1B	0	1	0	0	0	0		MIR215	1	0
THRA	0	1	0	0	0	0		CRNKL1	1	0
STAT1	0	1	0	0	0	0		MIR216A	1	1
CHRM3	0	1	0	0	0	0		BCL2L12	1	0
PTPN2	0	1	1	0	0	0		MIR374A	1	1
GRK5	0	1	0	0	0	0		CD274	1	1
CYP3A4	0	1	0	0	0	0		ILF3-DT	1	1
GPR55	0	1	0	0	0	0		MIR139	1	1
TFPI	0	1	0	0	0	0		SNAPC5	1	1
PIN1	0	1	0	0	0	0		MIR127	1	0
HSP90AA1	0	1	0	0	0	1		MIRLET7E	1	0
TLR8	0	1	0	0	0	0		MIR224	1	0
GGPS1	0	1	0	0	0	0		MIR128-2	1	0
DPP9	0	1	0	0	0	0		MIR191	1	0
CLK4	0	1	0	0	0	0		MIRLET7D	1	0
TACR2	0	1	0	0	0	0		MIR338	1	1
FFAR4	0	1	0	0	0	0		MIR107	1	0
CHUK	0	1	0	1	0	0		MIR185	1	1
GABRA1	0	1	0	1	0	1		MIRLET7G	1	0
C5AR1	0	1	0	0	0	0		MIR141	1	0
CHRM4	0	1	0	0	0	0		BCL2	1	1
NPC1	0	1	0	0	0	0		SF3B2	1	0
NFE2L2	0	1	0	0	1	0		MIR181A1	1	0
MDM4	0	1	0	0	0	0		MIR96	1	0
ATG4B	0	1	0	0	0	0		MIR27A	1	0
LGALS3	0	1	0	0	0	0		CCL27	1	0
SLC2A1	0	1	0	0	0	0		MIR122	1	1
GPR6	0	1	0	0	0	0		KNSTRN	1	0
STING1	0	1	0	0	0	0		LOC130064935	1	0
HDAC5	0	1	0	0	0	0		LOC130065490	1	0
PLAT	0	1	0	0	0	0		MIR331	1	0
NOX1	0	1	0	0	0	0		CTLA4	1	1
PTPN7	0	1	0	0	0	0		RMST	1	0
FPR2	0	1	0	0	0	0		MIR302C	1	0
CDC25C	0	1	0	0	0	0		NF1	1	1
CFTR	0	1	0	0	0	0		MIR199B	1	0
GBA2	0	1	0	0	0	0		LINC00707	1	0
GLO1	0	1	0	0	0	0		MIR181A2	1	0
TLR4	0	1	0	0	1	0		ERCC2	1	1
KDM1A	0	1	1	0	0	0		MIR532	1	0
GRB2	0	1	0	0	0	0		OCA2	1	1
NFKB1	0	1	0	1	0	0		DCT	1	1
KCNA5	0	1	0	0	0	0		FBN1	1	1
PSMB1	0	1	0	0	0	0		MIR184	1	0
ITK	0	1	0	0	0	0		MIR128-1	1	0
RPS6KA1	0	1	0	0	0	0		CD63	1	1
PTPN11	0	1	0	0	0	0		MIR302A	1	0
CHKA	0	1	0	0	0	0		MIR154	1	0
F2R	0	1	0	1	0	0		NKILA	1	0
SCN3A	0	1	1	0	0	0		MIR144	1	1
ABCC1	0	1	1	0	0	0		CDH1	1	1
GRM3	0	1	1	0	0	0		MIR135B	1	0
PRCP	0	1	0	0	0	0		MIR30B	1	0
ZAP70	0	1	0	0	0	0		MIR324	1	0
CHRM2	0	1	0	0	0	0		HOTAIRM1	1	0
KDM6B	0	1	0	0	0	0		MIR190A	1	0
PRSS1	0	1	0	0	0	0		MAGEA4	1	0
CDK1	0	1	0	0	0	0		THRIL	1	0
GLS	0	1	0	0	0	0		SOX2-OT	1	0
CTSS	0	1	0	0	0	0		MIR302D	1	0
GRIA2	0	1	0	0	0	0		MDM2	1	1
TMPRSS6	0	1	0	0	0	0		MIR28	1	0
NTSR2	0	1	0	0	0	0		MIR323A	1	0
METAP2	0	0	1	0	0	0		MIR95	1	0
MAPKAPK2	0	0	1	0	0	0		MIR302B	1	0
F7	0	0	1	0	0	0		MIR325	1	0
FAP	0	0	1	0	0	0		LINC01324	1	0
QPCT	0	0	1	0	0	0		HOXA-AS2	1	0
Ptger4	0	0	1	0	0	0		IFNG-AS1	1	0
Htr3a	0	0	1	0	0	0		MDC1-AS1	1	0
PDE5A	0	0	1	0	0	0		NRIR	1	0
WDR5	0	0	1	0	0	0		WFDC21P	1	0
PLAU	0	0	1	0	0	0		ABALON	1	0
PIK3CD	0	0	1	0	0	0		CSPG4	1	1
Comt	0	0	1	0	0	1		REXO6P	1	0
LDHB	0	0	1	0	0	0		MAGEA6	1	1
GPM3	0	0	1	0	0	0		NBN	1	1
CECR2	0	0	1	0	0	0		BRCA1	1	1
Mgll	0	0	1	0	0	0		LINC00937	1	0
inhA	0	0	1	0	0	0		LOC128781588	1	0
YES1	0	0	1	0	0	0		MIR143	1	1
GPR35	0	0	1	0	0	0		MAPK1	1	1
folA	0	0	1	0	0	0		IFNG	1	1
PTK6	0	0	1	0	0	0		MMP2	1	1
Acaca	0	0	1	1	0	0		HOXA11-AS	1	0
TMX2-CTNND1	0	0	0	1	0	0		IFNA1	1	1
CCL4	0	0	0	1	0	0		LOC128781582	1	0
BDNF-AS	0	0	0	1	0	0		LOC128781586	1	0
LINC01672	0	0	0	1	0	0		LOC128781589	1	0
PWAR1	0	0	0	1	0	0		LOC128781591	1	0
AR	0	0	0	1	0	0		LOC128849170	1	0
CERNA3	0	0	0	1	0	0		LOC128849172	1	0
GUSB	0	0	0	1	0	0		DRAIC	1	0
PARP1	0	0	0	1	0	0		PCAT29	1	0
H19	0	0	0	1	0	0		MAGEA2B	1	0
TP53	0	0	0	1	1	0		MAGEA2	1	0
BAX	0	0	0	1	1	0		MAGEA10	1	1
SIRT1	0	0	0	1	0	0		MAGEA12	1	0
MEG3	0	0	0	1	0	0		LOC128779115	1	0
LINC02605	0	0	0	1	0	0		LOC128781583	1	0
IL1B	0	0	0	1	1	0		LOC128781587	1	0
AKT1	0	0	0	1	0	1		LOC128822931	1	0
FABP1	0	0	0	1	0	0		MAGEA11	1	0
EMSLR	0	0	0	1	0	0		SOX10	1	1
MARK2	0	0	0	1	0	0		MAGED1	1	1
HSPA1A	0	0	0	1	0	0		PDCD1	1	1
SMAD5-AS1	0	0	0	1	0	0		LOC128706664	1	0
PRKAA2	0	0	0	1	0	0		LOC128706667	1	0
ABCC2	0	0	0	1	1	0		LOC128732306	1	0
FASN	0	0	0	1	0	0		CREB1	1	1
CYCS	0	0	0	1	0	0		ATM	1	1
REN	0	0	0	1	0	0		IFNA2	1	1
ANXA5	0	0	0	1	0	0		LOC128772394	1	0
XRCC1	0	0	0	1	0	0		LOC128772198	1	0
BSG	0	0	0	1	0	0		LOC128772202	1	0
PARP3	0	0	0	1	0	0		LOC128772203	1	0
MIR214	0	0	0	1	0	0		LOC128772206	1	0
LINC01234	0	0	0	1	0	0		LOC128772207	1	0
MIR5001	0	0	0	1	0	0		LOC128772208	1	0
ENSG00000255031	0	0	0	1	0	0		LOC128772213	1	0
ENSG00000260417	0	0	0	1	0	0		LOC128772214	1	0
CTNNB1	0	0	0	1	0	0		LOC128772215	1	0
MPO	0	0	0	1	0	0		LOC128772216	1	0
GFAP	0	0	0	1	0	0		LOC128772222	1	0
ENO2	0	0	0	1	0	0		LOC128772223	1	0
MAP2	0	0	0	1	0	0		LOC128772224	1	0
MIR664B	0	0	0	1	0	0		LOC128772225	1	0
GABBR2	0	0	0	1	0	0		LOC128772226	1	0
GABBR1	0	0	0	1	0	0		LOC128772227	1	0
TUG1	0	0	0	1	0	0		LOC128772228	1	0
MIR216A	0	0	0	1	0	0		LOC128772229	1	0
LINC00511	0	0	0	1	0	0		LOC128772231	1	0
LINC00958	0	0	0	1	0	0		LOC128772233	1	0
SLC9A3-AS1	0	0	0	1	0	0		LOC128772235	1	0
SOD2-OT1	0	0	0	1	0	0		LOC128772236	1	0
SNORD37	0	0	0	1	0	0		LOC128772243	1	0
SCARNA14	0	0	0	1	0	0		LOC128772249	1	0
MMP3	0	0	0	1	0	0		LOC128772251	1	0
CASP9	0	0	0	1	0	0		LOC128772255	1	0
CYP2B6	0	0	0	1	0	0		LOC128772261	1	0
DKK1	0	0	0	1	0	0		LOC128772262	1	0
MIR100	0	0	0	1	0	0		LOC128772263	1	0
MIR193B	0	0	0	1	0	0		LOC128772264	1	0
MIRLET7C	0	0	0	1	0	0		LOC128772265	1	0
MIR181B1	0	0	0	1	0	0		LOC128772266	1	0
MIR30A	0	0	0	1	0	0		LOC128772267	1	0
MIR373	0	0	0	1	0	0		LOC128772268	1	0
MIR217	0	0	0	1	0	0		LOC128772272	1	0
MIR15A	0	0	0	1	0	0		LOC128772273	1	0
MIR504	0	0	0	1	0	0		LOC128772274	1	0
MIR3911	0	0	0	1	0	0		LOC128772276	1	0
PWAR4	0	0	0	1	0	0		LOC128772277	1	0
MIR3197	0	0	0	1	0	0		LOC128772283	1	0
MIR6126	0	0	0	1	0	0		LOC128772286	1	0
IL6	0	0	0	1	1	0		LOC128772289	1	0
BCL2	0	0	0	1	1	0		LOC128772290	1	0
DDIT3	0	0	0	1	0	0		LOC128772293	1	0
HOTAIR	0	0	0	1	0	0		LOC128772301	1	0
VTRNA1-1	0	0	0	1	0	0		LOC128772304	1	0
VEGFA	0	0	0	1	0	0		LOC128772305	1	0
CXCL8	0	0	0	1	0	0		LOC128772307	1	0
FUT4	0	0	0	1	0	0		LOC128772310	1	0
NOS2	0	0	0	1	1	0		LOC128772311	1	0
PPARGC1A	0	0	0	1	0	0		LOC128772315	1	0
ESRRA	0	0	0	1	0	1		LOC128772318	1	0
IFNG	0	0	0	1	0	0		LOC128772319	1	0
CXCL12	0	0	0	1	0	0		LOC128772321	1	0
CX3CL1	0	0	0	1	0	0		LOC128772322	1	0
CCL8	0	0	0	1	0	0		LOC128772324	1	0
XCL1	0	0	0	1	0	0		LOC128772325	1	0
TERC	0	0	0	1	0	0		LOC128772326	1	0
SLCO2B1	0	0	0	1	0	0		LOC128772327	1	0
MMP9	0	0	0	1	0	0		LOC128772329	1	0
MAPK1	0	0	0	1	1	0		LOC128772337	1	0
XIAP	0	0	0	1	0	0		LOC128772339	1	0
ABCG2	0	0	0	1	0	0		LOC128772340	1	0
MCL1	0	0	0	1	0	0		LOC128772341	1	0
IL4	0	0	0	1	0	0		LOC128772343	1	0
CCL11	0	0	0	1	0	0		LOC128772344	1	0
ARSH	0	0	0	1	0	0		LOC128772348	1	0
FGFR1	0	0	0	1	0	0		LOC128772350	1	0
KDR	0	0	0	1	0	0		LOC128772356	1	0
PDGFRB	0	0	0	1	0	0		LOC128772359	1	0
STAT3	0	0	0	1	0	0		LOC128772360	1	0
HMOX1	0	0	0	1	1	0		LOC128772361	1	0
MYC	0	0	0	1	0	0		LOC128772362	1	0
TERT	0	0	0	1	0	0		LOC128772363	1	0
FOS	0	0	0	1	0	0		LOC128772366	1	0
NFKBIA	0	0	0	1	1	0		LOC128772367	1	0
MAPK8	0	0	0	1	0	0		LOC128772369	1	0
BCL2L1	0	0	0	1	0	0		LOC128772372	1	0
CD44	0	0	0	1	0	0		LOC128772375	1	0
CCNB1	0	0	0	1	0	0		LOC128772384	1	0
BCL6	0	0	0	1	0	0		LOC128772386	1	0
SLC16A1	0	0	0	1	0	0		LOC128772392	1	0
BIRC5	0	0	0	1	0	0		LOC128772395	1	0
BAD	0	0	0	1	0	0		LOC128772396	1	0
COX5A	0	0	0	1	0	0		LOC128772401	1	0
ITIH4	0	0	0	1	0	0		LOC128772403	1	0
SLC15A1	0	0	0	1	0	0		LOC128772405	1	0
TEP1	0	0	0	1	0	0		LOC128772407	1	0
MIR7-3HG	0	0	0	1	0	0		LOC128772410	1	0
PVT1	0	0	0	1	0	0		LOC128772411	1	0
MIR211	0	0	0	1	0	0		LOC128772413	1	0
EWSAT1	0	0	0	1	0	0		LOC128772414	1	0
MIR338	0	0	0	1	0	0		LOC128772417	1	0
ERVK-6	0	0	0	1	0	0		LOC128772422	1	0
FAS-AS1	0	0	0	1	0	0		LOC128772426	1	0
LINC01152	0	0	0	1	0	0		LOC128772428	1	0
BGLT3	0	0	0	1	0	0		LOC128772429	1	0
RNU105B	0	0	0	1	0	0		LOC128772430	1	0
SNORD12C	0	0	0	1	0	0		LOC128772431	1	0
THORLNC	0	0	0	1	0	0		LOC128772435	1	0
TRA-TGC7-1	0	0	0	1	0	0		LOC128772436	1	0
AHR	0	0	0	0	1	1		LOC128772437	1	0
AIF1	0	0	0	0	1	0		LOC128772438	1	0
ANGPT1	0	0	0	0	1	0		LOC128779116	1	0
ATF2	0	0	0	0	1	0		LOC128781584	1	0
CCNA2	0	0	0	0	1	0		LOC128781590	1	0
CCND1	0	0	0	0	1	0		LOC128822932	1	0
COL1A2	0	0	0	0	1	0		LOC128849173	1	0
CYP1A1	0	0	0	0	1	0		LOC128772300	1	0
CYP1A2	0	0	0	0	1	0		LOC128772355	1	0
EGF	0	0	0	0	1	0		LOC128772364	1	0
ELK1	0	0	0	0	1	0		LOC128772387	1	0
ERN1	0	0	0	0	1	0		MLH1	1	1
FOXA2	0	0	0	0	1	0		NUMB	1	0
GOT1	0	0	0	0	1	0		EGFR	1	1
GPT	0	0	0	0	1	0		CDK6	1	1
HES1	0	0	0	0	1	0		RB1	1	1
HEY1	0	0	0	0	1	0		XPC	1	1
HEY2	0	0	0	0	1	0		AKT3	1	1
HNF1A	0	0	0	0	1	0		RHPN1-AS1	1	0
HNF4A	0	0	0	0	1	0		MIR652	1	0
HSPB1	0	0	0	0	1	0		LOC128772254	1	0
INS1	0	0	0	0	1	0		LOC128772199	1	0
KEAP1	0	0	0	0	1	0		LOC128772200	1	0
MAPK3	0	0	0	0	1	0		LOC128772201	1	0
MYD88	0	0	0	0	1	0		LOC128772204	1	0
NLRP3	0	0	0	0	1	0		LOC128772205	1	0
NOTCH1	0	0	0	0	1	0		LOC128772209	1	0
PKM	0	0	0	0	1	0		LOC128772210	1	0
PPARG	0	0	0	0	1	0		LOC128772211	1	0
PRIMA1	0	0	0	0	1	0		LOC128772212	1	0
PYCARD	0	0	0	0	1	0		LOC128772217	1	0
RELA	0	0	0	0	1	0		LOC128772218	1	0
SNCA	0	0	0	0	1	0		LOC128772219	1	0
TEK	0	0	0	0	1	0		LOC128772220	1	0
TFAM	0	0	0	0	1	0		LOC128772221	1	0
TGFB1	0	0	0	0	1	0		LOC128772230	1	0
TH	0	0	0	0	1	0		LOC128772232	1	0
TXNIP	0	0	0	0	1	0		LOC128772234	1	0
USP27X	0	0	0	0	1	0		LOC128772239	1	0
VEGFC	0	0	0	0	1	0		LOC128772240	1	0
ACTB	0	0	0	0	0	1		LOC128772241	1	0
ATP5A1	0	0	0	0	0	1		LOC128772242	1	0
ATP5B	0	0	0	0	0	1		LOC128772244	1	0
ATP5C1	0	0	0	0	0	1		LOC128772245	1	0
CA14	0	0	0	0	0	1		LOC128772246	1	0
CA3	0	0	0	0	0	1		LOC128772247	1	0
CA5A	0	0	0	0	0	1		LOC128772248	1	0
CA5B	0	0	0	0	0	1		LOC128772250	1	0
CA6	0	0	0	0	0	1		LOC128772252	1	0
CBR1	0	0	0	0	0	1		LOC128772253	1	0
CDK6	0	0	0	0	0	1		LOC128772256	1	0
CEBPB	0	0	0	0	0	1		LOC128772257	1	0
CSNK2A1	0	0	0	0	0	1		LOC128772258	1	0
CYP1B1	0	0	0	0	0	1		LOC128772259	1	0
DHFRL1	0	0	0	0	0	1		LOC128772260	1	0
EIF3F	0	0	0	0	0	1		LOC128772269	1	0
ESR1	0	0	0	0	0	1		LOC128772270	1	0
ESR2	0	0	0	0	0	1		LOC128772271	1	0
ESRRB	0	0	0	0	0	1		LOC128772275	1	0
GABRA2	0	0	0	0	0	1		LOC128772278	1	0
GABRA3	0	0	0	0	0	1		LOC128772279	1	0
GABRA4	0	0	0	0	0	1		LOC128772280	1	0
GABRA5	0	0	0	0	0	1		LOC128772281	1	0
GABRA6	0	0	0	0	0	1		LOC128772282	1	0
GABRG1	0	0	0	0	0	1		LOC128772284	1	0
GABRG2	0	0	0	0	0	1		LOC128772285	1	0
GABRG3	0	0	0	0	0	1		LOC128772287	1	0
GPER1	0	0	0	0	0	1		LOC128772288	1	0
HCK	0	0	0	0	0	1		LOC128772291	1	0
HIBCH	0	0	0	0	0	1		LOC128772292	1	0
HSPA2	0	0	0	0	0	1		LOC128772294	1	0
IGHG1	0	0	0	0	0	1		LOC128772295	1	0
JAK1	0	0	0	0	0	1		LOC128772296	1	0
NCOA1	0	0	0	0	0	1		LOC128772297	1	0
NCOA2	0	0	0	0	0	1		LOC128772302	1	0
PIK3CG	0	0	0	0	0	1		LOC128772303	1	0
PIM1	0	0	0	0	0	1		LOC128772306	1	0
PRKACA	0	0	0	0	0	1		LOC128772308	1	0
PRKCA	0	0	0	0	0	1		LOC128772309	1	0
PRKCB	0	0	0	0	0	1		LOC128772312	1	0
PTK2B	0	0	0	0	0	1		LOC128772313	1	0
RUVBL2	0	0	0	0	0	1		LOC128772314	1	0
SF3B3	0	0	0	0	0	1		LOC128772316	1	0
SHBG	0	0	0	0	0	1		LOC128772317	1	0
STK17B	0	0	0	0	0	1		LOC128772320	1	0
SYK	0	0	0	0	0	1		LOC128772323	1	0
UBA1	0	0	0	0	0	1		LOC128772328	1	0
UGT3A1	0	0	0	0	0	1		LOC128772330	1	0
								LOC128772331	1	0
								LOC128772332	1	0
								LOC128772333	1	0
								LOC128772334	1	0
								LOC128772335	1	0
								LOC128772336	1	0
								LOC128772338	1	0
								LOC128772342	1	0
								LOC128772345	1	0
								LOC128772346	1	0
								LOC128772347	1	0
								LOC128772349	1	0
								LOC128772351	1	0
								LOC128772352	1	0
								LOC128772353	1	0
								LOC128772354	1	0
								LOC128772357	1	0
								LOC128772358	1	0
								LOC128772368	1	0
								LOC128772370	1	0
								LOC128772371	1	0
								LOC128772373	1	0
								LOC128772374	1	0
								LOC128772376	1	0
								LOC128772377	1	0
								LOC128772378	1	0
								LOC128772379	1	0
								LOC128772380	1	0
								LOC128772381	1	0
								LOC128772382	1	0
								LOC128772383	1	0
								LOC128772385	1	0
								LOC128772388	1	0
								LOC128772389	1	0
								LOC128772390	1	0
								LOC128772391	1	0
								LOC128772393	1	0
								LOC128772397	1	0
								LOC128772398	1	0
								LOC128772399	1	0
								LOC128772400	1	0
								LOC128772402	1	0
								LOC128772404	1	0
								LOC128772406	1	0
								LOC128772408	1	0
								LOC128772409	1	0
								LOC128772237	1	0
								LOC128772238	1	0
								LOC128772298	1	0
								LOC128772299	1	0
								LOC128772365	1	0
								MAGEC1	1	1
								CRYBG1	1	1
								EWSR1	1	1
								MTAP	1	1
								CXCL1	1	1
								MAGEA9	1	0
								MAGEA8	1	0
								ATF1	1	1
								MAGED4B	1	1
								MSH2	1	1
								MAGEA5P	1	0
								MAGEC2	1	1
								EIF1AX	1	1
								TNF	1	1
								KISS1	1	1
								ANKRD36B	1	1
								KLC1	1	0
								MAGEB2	1	1
								POU3F2	1	1
								CXCR4	1	1
								GPNMB	1	1
								E2F1	1	1
								BAX	1	1
								MIR21	1	1
								MAGEB1	1	0
								MAGED2	1	1
								LINC00328	1	1
								ABCB5	1	1
								IFNB1	1	1
								ERCC3	1	1
								STAT3	1	1
								DDB2	1	1
								CDKN1B	1	1
								ADAM7	1	0
								MIA3	1	1
								TRPM1	1	1
								MAGEB3	1	0
								MAGEE1	1	0
								MAGEH1	1	0
								SDCBP	1	1
								ERCC5	1	1
								FAP	1	1
								CTAG2	1	1
								XPA	1	1
								MSH6	1	0
								MET	1	1
								ERCC4	1	1
								PTK2	1	1
								TNFRSF10B	1	1
								ASIP	1	1
								IFIH1	1	1
								MAGEE2	1	0
								PMS2	1	0
								KDR	1	1
								MIA2	1	0
								PARP1	1	1
								LOC128772412	1	0
								LOC128772415	1	0
								LOC128772416	1	0
								LOC128772418	1	0
								LOC128772419	1	0
								LOC128772420	1	0
								LOC128772421	1	0
								LOC128772423	1	0
								LOC128772424	1	0
								LOC128772425	1	0
								LOC128772427	1	0
								LOC128772432	1	0
								LOC128772433	1	0
								LOC128772434	1	0
								LOC128781585	1	0
								LOC128822933	1	0
								LOC128822934	1	0
								LOC128849171	1	0
								VEGFA	1	1
								MAGEB4	1	0
								WNT5A	1	1
								S100A6	1	1
								NGFR	1	1
								CTAG1B	1	1
								IL6	1	1
								MAGED4	1	1
								HIF1A	1	1
								NME1	1	1
								ING1	1	1
								MAPK3	1	1
								POLH	1	1
								MHENCR	1	0
								SMAD4	1	1
								MIR125A	1	1
								BAGE5	1	0
								BAGE3	1	0
								BIRC7	1	1
								MAGEF1	1	0
								BSG	1	1
								NIBAN2	1	0
								CASP3	1	1
								MMP16	1	0
								MMP1	1	1
								TFAP2A	1	1
								IGF1R	1	1
								BAGE4	1	0
								CDK2	1	1
								BAGE2	1	0
								MAGEB10	1	0
								CXCR2	1	1
								CCNA2	1	0
								MIR146B	1	0
								KDM5B	1	1
								BAK1	1	0
								CASP9	1	1
								ETS1	1	1
								THBS1	1	1
								HLA-A	1	1
								FAS	1	1
								CSF2	1	1
								EPHA2	1	1
								MIR199A1	1	1
								POMC	1	1
								GADD45A	1	1
								ERCC1	1	1
								PLAU	1	1
								CERNA3	1	0
								CASP8	1	1
								ENPP2	1	0
								ANXA5	1	1
								MAGEA9B	1	0
								MIR508	1	0
								MAGEL2	1	0
								HGF	1	1
								GPR143	1	0
								PLA2G6	1	1
								IL10	1	1
								OTOR	1	0
								BRIP1	1	1
								LINC01672	1	0
								MIB2	1	1
								SRC	1	1
								YAP1	1	1
								HLA-B	1	1
								CLPTM1L	1	1
								ALCAM	1	1
								MIR142	1	0
								LINC02605	1	1
								TM9SF4	1	0
								VEGFC	1	1
								GRIN2A	1	1
								KIDINS220	1	0
								FGF2	1	1
								WRN	1	0
								MEAT6	1	0
								ENSG00000231590	1	0
								ENSG00000232446	1	0
								ENSG00000232644	1	0
								ENSG00000234812	1	0
								LOC100420318	1	0
								ENSG00000223377	1	0
								ENSG00000224931	1	0
								ENSG00000225469	1	0
								ENSG00000227493	1	0
								ENSG00000227511	1	0
								ENSG00000228833	1	0
								ENSG00000229322	1	0
								ENSG00000231694	1	0
								ENSG00000233663	1	0
								ENSG00000236205	1	0
								ENSG00000237171	1	0
								ENSG00000237926	1	0
								ENSG00000250625	1	0
								ENSG00000269475	1	0
								ENSG00000270794	1	0
								ENSG00000277516	1	0
								LOC124908139	1	0
								LOC124908467	1	0
								bA255A11.4	1	0
								NF2	1	1
								RAD51C	1	1
								TERC	1	1
								PTGS2	1	1
								RAD51	1	1
								RECQL4	1	0
								MMP14	1	1
								CITED1	1	1
								ABCC1	1	1
								MCL1	1	1
								PXDN	1	0
								PNN	1	0
								MIR509-1	1	0
								ARID2	1	1
								JUN	1	1
								TGFB1	1	1
								MIR6759	1	0
								CDK10	1	1
								IDO1	1	1
								NAB2	1	0
								TRP-AGG2-6	1	1
								TIMP3	1	1
								BAMBI	1	0
								CXCL2	1	0
								MMP9	1	1
								ICAM1	1	1
								MIRLET7C	1	0
								KITLG	1	1
								PREX2	1	1
								CDH5	1	1
								PWWP3A	1	0
								NFKB1	1	1
								ADAM29	1	0
								APC	1	1
								HMGB1	1	1
								SDHD	1	1
								TGFB2	1	1
								PHF19	1	0
								SETDB1	1	1
								MIR494	1	1
								SMARCB1	1	1
								PTCH1	1	1
								MKI67	1	1
								PTPN11	1	1
								MIR155	1	1
								CD44	1	1
								RAD51D	1	1
								MRPL28	1	1
								LOC107988030	1	0
								BRMS1	1	1
								IFI16	1	0
								VIM	1	1
								TNFSF10	1	1
								BARD1	1	1
								IL19	1	0
								FOS	1	1
								ITGB1	1	1
								FASLG	1	1
								CD59	1	1
								BCL2L1	1	1
								CDKN3	1	1
								NTRK1	1	1
								EZR	1	1
								RET	1	1
								BIRC5	1	1
								HLA-DRB1	1	1
								GSTM1	1	1
								POLE	1	0
								TTN	1	0
								VDR	1	1
								EIF2AK2	1	1
								KRT8	1	0
								MIR214	1	1
								PALLD	1	1
								CDKN2C	1	1
								PAX3	1	1
								FLT1	1	1
								IL4	1	1
								VTN	1	1
								ENG	1	1
								MTDH	1	1
								EP300	1	1
								LEF1	1	1
								CFLAR	1	1
								TMX2-CTNND1	1	0
								MIR29C	1	1
								PLG	1	1
								IL1B	1	1
								IL7	1	1
								BLM	1	1
								XRCC1	1	1
								CD8A	1	1
								TBX2	1	1
								EPHA3	1	1
								FANCA	1	1
								KLHL9	1	0
								PRKDC	1	0
								GSTP1	1	1
								MAGEB18	1	0
								HPSE	1	1
								MRE11	1	1
								C11orf65	1	0
								CCAT1	1	0
								MIR146A	1	1
								TRP-AGG2-5	1	1
								CDH2	1	1
								EGF	1	1
								RABL3	1	0
								CCN1	1	1
								MAGEB6	1	0
								MAGEB5	1	0
								RAD50	1	1
								CD4	1	0
								OSM	1	1
								RTEL1	1	1
								TERF2	1	1
								BDNF-AS	1	0
								FLT4	1	1
								ERBB3	1	1
								GAPDH	1	1
								CD46	1	0
								STN1	1	1
								SOD2-OT1	1	0
								PCNA	1	1
								PIK3CG	1	1
								MIR18A	1	0
								WRAP53	1	0
								BIVM-ERCC5	1	0
								MIR498	1	0
								LAG3	1	1
								MAPK8	1	1
								SMARCA4	1	1
								CD55	1	0
								LGALS3	1	1
								TUG1	1	1
								TERF1	1	1
								SPARC	1	1
								PWWP3B	1	0
								TYMS	1	0
								NES	1	1
								SPP1	1	1
								SYP	1	0
								CYCS	1	0
								TIMP1	1	1
								ENO2	1	1
								IL1A	1	1
								LIF	1	1
								MIR150	1	1
								TINF2	1	0
								ERCC6	1	1
								MIR145	1	1
								FANCC	1	0
								MAGEB16	1	0
								PRSS1	1	1
								ASAP1	1	0
								BCL2L11	1	1
								CD34	1	1
								AKT2	1	1
								APAF1	1	1
								CDKN2D	1	0
								PRKCA	1	1
								CRYBG2	1	0
								IRF4	1	1
								ALK	1	1
								EDNRB	1	1
								COL7A1	1	0
								MUTYH	1	1
								RHOA	1	0
								CCR7	1	1
								NRG1	1	1
								TSC1	1	0
								NOTCH1	1	1
								FLCN	1	0
								XIAP	1	1
								TIGIT	1	0
								LATS1	1	0
								BRAP	1	0
								FANCD2	1	0
								RAD17	1	0
								CD36	1	0
								CAT	1	1
								PLAUR	1	1
								MAPK14	1	1
								POLR1C	1	0
								MIR320A	1	0
								FGFR3	1	1
								MIR9-1	1	0
								U2AF1	1	0
								ABL1	1	1
								MUC1	1	1
								OVAAL	1	0
								ITGAV	1	1
								SDHC	1	1
								WT1	1	1
								SKP2	1	1
								FANCM	1	0
								RASSF1	1	1
								MIR30A	1	1
								NOS2	1	1
								BMP6	1	0
								F2R	1	1
								SPRED1	1	0
								HSP90AA1	1	1
								ATF2	1	1
								MAGEB17	1	0
								KRT20	1	1
								SP1	1	1
								APEX1	1	1
								LAMP1	1	1
								CDH3	1	1
								MAGEC3	1	0
								CASC2	1	1
								PDGFRB	1	1
								PMS1	1	0
								NFE2L2	1	1
								DICER1	1	1
								HSPA5	1	1
								ITGB3	1	1
								TCHP	1	0
								IGF1	1	1
								VCAN	1	1
								GLI1	1	1
								SRSF2	1	0
								ANK3	1	0
								HLA-G	1	1
								TIMP2	1	1
								DSCR8	1	0
								RASGRP3	1	1
								PPARG	1	1
								AURKA	1	1
								PRSS58	1	0
								NEK11	1	0
								DDX11	1	1
								MME	1	1
								MAGEA7P	1	0
								MIAT	1	0
								H2AX	1	1
								E2F3	1	1
								FN1	1	1
								CIITA	1	1
								MIRLET7I	1	0
								CAV1	1	1
								MIR373	1	1
								TMEM127	1	0
								TSC2	1	1
								CXCL12	1	1
								ADAM10	1	1
								XRCC5	1	1
								S100A1	1	1
								ABCB1	1	1
								PROM1	1	1
								SOX2	1	1
								FGFR1	1	1
								MIR126	1	1
								CXCL10	1	1
								IFI27	1	1
								NEAT1	1	1
								TGFA	1	1
								KRT7	1	0
								MIR10B	1	1
								AXL	1	1
								PNPT1	1	1
								TOP1	1	1
								MIR125B1	1	0
								TUBB3	1	1
								CYTOR	1	0
								TRAPPC1	1	1
								LOC121175367	1	0
								LOC127271334	1	0
								LOC127814524	1	0
								LOC127822478	1	0
								LOC127884371	1	0
								LOC127894713	1	0
								LOC127896714	1	0
								NRP1	1	1
								PECAM1	1	1
								TAP1	1	1
								CTNND1	1	1
								SEC23B	1	1
								MYCN	1	1
								PIK3CB	1	1
								XRCC2	1	0
								SIRT1	1	1
								METTL3	1	0
								LMCD1	1	0
								EIF1B	1	0
								PRKD1	1	0
								HHAT	1	1
								IL15	1	1
								SERPINF1	1	1
								SDHB	1	1
								KLLN	1	1
								LOC129936244	1	0
								IL18	1	1
								PWAR1	1	1
								MIR98	1	0
								MIR148B	1	1
								ILK	1	1
								PERP	1	1
								RECK	1	1
								KRT5	1	0
								MIR424	1	0
								BID	1	1
								ARMC9	1	0
								RAB4B-EGLN2	1	0
								FOXP3	1	1
								USF3	1	0
								GDNF	1	1
								TNFRSF10A	1	1
								BMPR1A	1	0
								LGALS1	1	1
								MIR223	1	0
								AR	1	1
								SNAI2	1	1
								PAK1	1	1
								SOS1	1	1
								SOCS1	1	1
								ASXL1	1	1
								HLA-DQB1	1	1
								ANK1	1	0
								BAD	1	1
								MIR99A	1	0
								MIA-RAB4B	1	0
								FLNA	1	1
								PGR-AS1	1	0
								XRCC6	1	1
								TRC-GCA24-1	1	0
								MIR29A	1	1
								TMC8	1	0
								GNA14	1	0
								MAGEB6B	1	0
								TLR4	1	1
								IDH2	1	1
								LOC126862571	1	0
								PLAT	1	1
								IGFBP3	1	1
								IGF2	1	1
								LOC127271755	1	0
								LOC127884367	1	0
								RMRP	1	0
								YTHDF2	1	0
								CRP	1	1
								CEACAM1	1	1
								CCL2	1	1
								LOC100533997	1	0
								SLC24A5	1	0
								ZFAS1	1	1
								MTUS1	1	0
								MTUS2	1	0
								MMP3	1	1
								CTSB	1	1
								CXCR1	1	1
								HERC2	1	1
								CDK1	1	1
								PLXNC1	1	1
								MLH3	1	0
								ANAPC1	1	0
								TFRC	1	1
								GPC3	1	1
								RREB1	1	1
								GSK3B	1	1
								NDN	1	1
								JUP	1	0
								TP73	1	1
								ANK2	1	0
								CTC1	1	0
								ING3	1	1
								FANCG	1	0
								HSPB1	1	1
								PDCD6	1	0
								SHC4	1	0
								NFKBIA	1	0
								HCFC1	1	0
								TWIST1	1	1
								PRKAR1A	1	1
								CSF3	1	1
								GGT1	1	0
								SCARNA5	1	0
								NTRK3	1	1
								L1CAM	1	1
								LOC126860202	1	0
								TF	1	0
								CSF1	1	1
								ADAM18	1	0
								CCNL2	1	0
								MMP13	1	1
								MIR203A	1	1
								MIR22	1	1
								RARB	1	1
								PGR	1	1
								MIR148A	1	0
								MIR503	1	0
								ATR	1	1
								CASP10	1	1
								HEIH	1	0
								MEN1	1	1
								MXI1	1	1
								KRT18	1	0
								UBR4	1	1
								NQO1	1	1
								F3	1	1
								AGER	1	1
								MGAT5	1	0
								PRKN	1	1
								HPS1	1	0
								E2F2	1	0
								SNCA	1	1
								NHP2	1	0
								NOP10	1	0
								CBX7	1	0
								CFAP58	1	0
								SNX31	1	0
								CFAP47	1	0
								ADAM28	1	0
								CCR5	1	1
								ADAMTSL1	1	0
								EIF2S1	1	0
								MIR106B	1	1
								KLF4	1	1
								TOP2A	1	1
								PIK3R2	1	0
								PDGFA	1	1
								MIR495	1	1
								PXN	1	1
								MIR195	1	1
								LINC00518	1	1
								TAP2	1	1
								JAK2	1	1
								CCND3	1	1
								GRB2	1	0
								VEGFD	1	0
								MIR206	1	1
								LOC126861834	1	0
								FGF1	1	1
								NCAPG	1	0
								RBL1	1	0
								CEACAM5	1	1
								SERPINB5	1	1
								HELLS	1	0
								SNAI1	1	1
								CD82	1	1
								GAGE1	1	1
								SKI	1	1
								GDF15	1	1
								MAP2K4	1	0
								SMARCA2	1	1
								RAB38	1	1
								ITGA2	1	1
								ITGA4	1	1
								PIR	1	0
								LOX	1	1
								NSMCE3	1	0
								MIR152	1	0
								CRNDE	1	0
								SLC2A1	1	1
								LYVE1	1	0
								RELA	1	1
								CASP1	1	1
								BCAR1	1	1
								SOD2	1	1
								ZEB1	1	1
								MAP3K1	1	1
								LUCAT1	1	0
								EIF2AK3	1	0
								IRF1	1	1
								SOX4	1	1
								ENO1	1	0
								EPCAM	1	1
								EDNRB-AS1	1	0
								ACP1	1	0
								S100A8	1	1
								DLEU2	1	0
								MIR375	1	0
								DANCR	1	0
								DNMT1	1	1
								PRKCI	1	0
								GSTT1	1	1
								CCL20	1	0
								GZMB	1	1
								DNMT3B	1	1
								MIR485	1	0
								NT5E	1	1
								CHEK1	1	1
								CD80	1	1
								MIR4473	1	0
								PBRM1	1	0
								GNA12	1	1
								SLC25A16	1	0
								RHPN1	1	0
								ZRSR2	1	0
								RECQL	1	0
								FH	1	0
								ITGA6	1	0
								YTHDF1	1	0
								CCNB1	1	1
								GSDMC	1	0
								BECN1	1	1
								KRT14	1	0
								RNU6-1	1	0
								FEN1	1	0
								TRA-TGC7-1	1	0
								POSTN	1	1
								HLA-C	1	1
								PLK1	1	1
								AHR	1	1
								S100A4	1	1
								CEACAM3	1	0
								LINC02946	1	0
								DES	1	1
								PPP1R15A	1	0
								TRB	1	0
								ADAM12	1	0
								HDAC1	1	1
								MIR7-3HG	1	0
								CXCL3	1	0
								SHPRH	1	0
								FASN	1	1
								VCL	1	0
								TNFRSF10D	1	1
								ODC1	1	0
								TMC6	1	0
								KLRK1	1	1
								PHIP	1	1
								RNF43	1	1
								RPS27	1	1
								SERPINE1	1	1
								MDM4	1	1
								MIR429	1	0
								CD99	1	0
								MIR198	1	0
								MIR186	1	0
								ALKBH5	1	0
								SERPINB2	1	1
								PRDX5	1	0
								SST	1	1
								CASP2	1	1
								SOX9	1	1
								CASP7	1	0
								CD163	1	1
								PSMC4	1	0
								FGFR2	1	1
								CTSL	1	1
								MX2	1	1
								ITK	1	0
								PPP2R1A	1	0
								ZNRF3	1	0
								GLI2	1	1
								SMAD7	1	1
								AXIN2	1	0
								EDN3	1	1
								FTL	1	0
								MIR637	1	0
								GJA1	1	1
								EDN1	1	1
								GAGE4	1	1
								CCNG1	1	0
								ALB	1	0
								MIR26B	1	1
								RAD51L3-RFFL	1	0
								BCYRN1	1	0
								SCN8A	1	0
								AOPEP	1	0
								MSH3	1	1
								LCP1	1	0
								RASA2	1	1
								CBS	1	1
								HMOX1	1	1
								LOC130062899	1	0
								FSCN1	1	0
								EPHB4	1	1
								ST8SIA1	1	1
								MIR455	1	1
								RAPGEF3	1	1
								FOXO3	1	1
								CANX	1	1
								CXCR3	1	1
								SNORD15A	1	0
								GJB2	1	1
								BMI1	1	1
								DUSP19	1	0
								MIR501	1	0
								DEK	1	1
								PYCARD	1	1
								MIR346	1	0
								CDH13	1	1
								SAT1	1	0
								CCN2	1	1
								SMAD2	1	0
								MIR129-1	1	0
								MIR376A1	1	0
								WEE1	1	1
								CD9	1	1
								ID1	1	1
								LAMC2	1	1
								HOXB7	1	1
								TSHR	1	0
								ESR1	1	1
								GRM1	1	1
								SH3PXD2A	1	0
								NTHL1	1	0
								GHR	1	1
								PEAK1	1	0
								CTSC	1	1
								HAGLR	1	0
								AAGAB	1	0
								SSX2	1	1
								CD28	1	1
								LINC-PINT	1	0
								FANCE	1	0
								TDP1	1	0
								TRE-TTC3-1	1	0
								CCNE1	1	0
								CDK7	1	1
								RIGI	1	0
								SMAD3	1	0
								CALML5	1	0
								RPS6KB1	1	1
								S100A2	1	1
								HDAC9	1	1
								ID2	1	0
								HLA-DQA1	1	1
								MIR3916	1	0
								DDB1	1	0
								CD40	1	1
								MVP	1	0
								SNORD44	1	0
								LOC129390903	1	0
								POLK	1	0
								HNF1B	1	0
								ARNT	1	1
								STAT5A	1	1
								RARA	1	1
								FGF7	1	0
								IL6R	1	0
								SNHG16	1	0
								CDC25A	1	0
								RAD51B	1	0
								RAD23A	1	0
								ANGPT2	1	1
								OGG1	1	1
								GATA2	1	0
								FGFR4	1	1
								FLOT2	1	1
								CD1D	1	0
								ITGA5	1	1
								PPARGC1A	1	1
								LDHA	1	1
								MIR513A2	1	0
								CTNNA1	1	0
								PLEK2	1	0
								YY1	1	1
								TP53BP1	1	0
								ROCK2	1	0
								MIR23A	1	1
								TJP1	1	0
								SDHA	1	0
								MAP3K8	1	1
								GSDME	1	1
								CTSK	1	1
								RPA2	1	0
								NOX4	1	1
								MIF	1	1
								MIR605	1	0
								FALEC	1	0
								SOCS3	1	1
								MIR19B1	1	0
								PIGU	1	1
								DIABLO	1	1
								GAGE2C	1	0
								TGFBR2	1	0
								LINC00520	1	0
								SOD1	1	0
								FOXD3	1	1
								ELK1	1	0
								METTL14	1	0
								NFATC2	1	1
								CUL4A	1	0
								MIR155HG	1	0
								CAPN3	1	1
								BUB1B	1	0
								PLEKHA4	1	0
								REV3L	1	0
								MIR337	1	1
								BASP1-AS1	1	0
								RAB27A	1	1
								YBX1	1	1
								FYN	1	0
								ROR1	1	1
								NORAD	1	1
								SLX4	1	0
								IL2RB	1	1
								SPINK1	1	0
								IL2RA	1	1
								MIR129-2	1	0
								STAT2	1	1
								SPANXC	1	1
								EXO1	1	0
								NGF	1	1
								HOXA11	1	0
								ITGA3	1	0
								MIR377	1	0
								MRI1	1	0
								FTO	1	1
								DPP4	1	1
								PPAT	1	0
								CCL5	1	1
								RUNX3	1	1
								ABCG2	1	1
								MIR25	1	0
								ARF1	1	0
								SETD2	1	1
								RIPK1	1	1
								POLD1	1	1
								DPYD	1	0
								TNC	1	1
								CYP1A1	1	0
								NOTCH2	1	0
								MIR542	1	0
								IGF2BP3	1	1
								RNASEL	1	0
								IL3	1	0
								GRM3	1	1
								MIR125B2	1	0
								SHH	1	0
								RICTOR	1	1
								PPARA	1	1
								EPB41L4A-DT	1	0
								MIR20A	1	0
								DKK1	1	1
								PDGFB	1	0
								CTTN	1	1
								TRPA1	1	0
								ROS1	1	1
								FKBP5	1	1
								HSPA4	1	1
								MIR296	1	0
								JAK1	1	1
								RAD23B	1	0
								THY1	1	1
								TET2	1	1
								TYMP	1	1
								ERN1	1	1
								CDC42	1	1
								PKN1	1	0
								RAPGEF2	1	0
								CUL1	1	1
								MICA	1	1
								PSMB9	1	1
								HMGA2	1	1
								CETN2	1	0
								BMP2	1	0
								FURIN	1	0
								CTSD	1	1
								ATRX	1	0
								TLR7	1	1
								MIR33A	1	1
								NCK1	1	0
								TGM2	1	1
								TFE3	1	1
								TLE1	1	0
								PRKCB	1	1
								EPHA7	1	0
								THORLNC	1	0
								KANSL1	1	0
								ITGB2	1	1
								SLC16A1	1	1
								NODAL	1	1
								ACTC1	1	0
								RUNX2	1	1
								DIS3	1	0
								MMP7	1	1
								VCAM1	1	1
								RMI1	1	0
								TP63	1	1
								AFG3L1P	1	1
								PAK5	1	0
								CD68	1	1
								IFI30	1	1
								SNRPA	1	0
								CCND2	1	0
								SLC24A4	1	0
								MIMT1	1	0
								SKIL	1	1
								LRMDA	1	0
								IGF2BP1	1	1
								AURKB	1	1
								SAG	1	0
								SPIRE2	1	0
								KCNQ1OT1	1	0
								MAP3K5	1	1
								CEBPB	1	0
								IL21	1	0
								LOC130001606	1	0
								LOC130001607	1	0
								AFP	1	0
								PHLDB1	1	0
								CD1A	1	0
								CYP1B1-AS1	1	0
								ANPEP	1	1
								PEBP1	1	1
								MUC16	1	0
								PTK2B	1	1
								EPHA4	1	0
								MIR507	1	0
								RBL2	1	0
								FANCL	1	0
								MIR199A2	1	1
								MIR196A1	1	0
								GAGE2B	1	0
								TNFRSF1A	1	0
								POLN	1	0
								FANCF	1	0
								STK38	1	0
								CCDC26	1	0
								CTBP1	1	1
								IHH	1	0
								CSAG2	1	0
								FANCI	1	0
								MAP3K15	1	0
								PIEZO1	1	0
								ITGAL	1	1
								RHOC	1	0
								ADAM15	1	1
								HSPB8	1	1
								ADGRG1	1	1
								TLR3	1	1
								MAP1LC3A	1	0
								DSG2	1	1
								EEF2	1	0
								CCN4	1	1
								TRPV3	1	1
								MBTPS2	1	1
								COL14A1	1	0
								CA9	1	1
								CSAG3	1	0
								RASA1	1	1
								PNKP	1	0
								TDG	1	0
								IK	1	0
								MIR31HG	1	0
								FCRLA	1	0
								PKM	1	1
								HLA-E	1	1
								MIR608	1	0
								NBAT1	1	0
								MIR622	1	0
								PHLDA1	1	1
								ERAP1	1	0
								RBX1	1	1
								POLD2	1	0
								S100A9	1	1
								EIF4EBP1	1	0
								TNFRSF19	1	1
								MT-TT	1	0
								PTAFR	1	1
								TGFB3	1	1
								TMSB10	1	0
								SUFU	1	0
								CYLD	1	1
								MMP10	1	0
								DLX6-AS1	1	0
								MIR335	1	0
								MIR422A	1	0
								TTN-AS1	1	0
								ALOX12	1	1
								BRD4	1	0
								COQ8B	1	0
								PDPN	1	1
								DHFR	1	1
								CD1C	1	0
								HINT2	1	0
								NLRP3	1	1
								CHGA	1	0
								CADM1	1	1
								RNF8	1	0
								EPAS1	1	1
								MIR376C	1	0
								TRPM8	1	1
								PTGER4	1	0
								GPI	1	0
								LZTR1	1	0
								ROR2	1	1
								B4GALNT1	1	1
								KDM5A	1	0
								CD86	1	1
								ELN	1	1
								HNF1A-AS1	1	0
								LINC00324	1	0
								BMP4	1	1
								VENTX	1	0
								RNF125	1	0
								FLACC1	1	1
								MIRLET7A3	1	0
								RBBP8	1	0
								RORA	1	1
								HMMR	1	0
								ANXA9	1	0
								RSF1	1	0
								ELAVL1	1	1
								CD58	1	1
								TRO	1	0
								NTF3	1	0
								TRA	1	0
								UBE2N	1	0
								HSPA8	1	1
								MIR365A	1	0
								PIK3CD	1	1
								TAF1	1	0
								CLU	1	1
								HSPH1	1	0
								HDAC6	1	1
								ROCK1	1	1
								MTA1	1	1
								RRAS2	1	0
								ATF6	1	0
								SOX5	1	0
								SLC6A17	1	0
								IL32	1	1
								EXT1	1	0
								HNF1A	1	0
								TRIM24	1	0
								ELAC2	1	0
								DDIT3	1	1
								LINC00459	1	0
								MIR205HG	1	0
								EDNRA	1	1
								EMSLR	1	0
								AMBRA1	1	0
								BIRC3	1	1
								EIF4E1B	1	0
								HAR1A	1	0
								PINK1-AS	1	0
								SNORA30	1	0
								ADAM9	1	1
								PLCG1	1	0
								XBP1	1	0
								NCAM1	1	0
								ETV1	1	1
								FMNL2	1	0
								MYEF2	1	0
								COLCA1	1	0
								MIR432	1	0
								CXCL9	1	0
								DST	1	1
								NECTIN2	1	0
								ASS1	1	1
								VAV1	1	0
								PLAA	1	1
								NRP2	1	1
								TRIM33	1	0
								TRAF2	1	0
								LLGL1	1	1
								SIN3A	1	0
								KCNMA1	1	0
								GSR	1	0
								NSMCE1	1	0
								WWTR1	1	0
								TXN	1	1
								CEACAM4	1	0
								MIR330	1	1
								ZFP91	1	0
								NKX2-1	1	0
								MYB	1	1
								MIR33B	1	0
								PFKP	1	0
								SCGB2B2	1	0
								FMR1	1	0
								RAD18	1	0
								SDHAF2	1	0
								NTRK2	1	0
								FGF3	1	1
								AKAP12	1	0
								LMNA	1	0
								ANXA2	1	0
								HNRNPUL1	1	0
								MAP2K7	1	1
								MYO5A	1	1
								MYO1B	1	1
								MAP2	1	1
								NAMPT	1	1
								KLRD1	1	0
								LGALS3BP	1	0
								TLR2	1	1
								POLI	1	0
								PDCD1LG2	1	1
								FTMT	1	0
								SPAAR	1	0
								MIR376B	1	0
								ATF3	1	0
								LCK	1	0
								SSTR2	1	0
								EIF4E	1	1
								FAM215A	1	0
								TBX3	1	1
								CD5	1	0
								LTF	1	1
								MIR486-1	1	0
								ZNF276	1	0
								GACAT3	1	0
								NCOA3	1	1
								HMGCR	1	0
								PTP4A3	1	1
								GATA3	1	0
								MPG	1	0
								AMFR	1	0
								USF1	1	1
								DMD	1	0
								LINC01194	1	1
								PTPN1	1	0
								LTA	1	0
								MMP8	1	1
								TTK	1	1
								DAPK1	1	0
								MUC4	1	0
								DIRC3	1	0
								PPARGC1B	1	1
								GINS1	1	0
								GINS4	1	0
								IGFBP2	1	1
								RPA1	1	0
								CYP27B1	1	1
								TMEM87A	1	0
								MIRLET7A1	1	0
								RORC	1	0
								UHRF1	1	0
								ING4	1	1
								FABP7	1	1
								IL17A	1	1
								SMO	1	0
								VHL	1	0
								KLK6	1	0
								RASEF	1	1
								AHNAK	1	0
								MIR4443	1	0
								EPO	1	1
								EFNA1	1	0
								PSMAGEA	1	0
								TKT	1	0
								GTF2H5	1	0
								PMAIP1	1	1
								CYP24A1	1	1
								RAB8A	1	1
								TAPBP	1	1
								RPS6KA2	1	0
								HDC	1	1
								HAL	1	0
								EGR1	1	0
								PTPRC	1	0
								MICB	1	0
								SLURP1	1	1
								KISS1R	1	1
								DCN	1	0
								CST3	1	1
								CHI3L1	1	1
								LPP	1	0
								CCNE2	1	0
								CCR6	1	0
								MIR30E	1	0
								ASAP1-IT1	1	0
								MIR572	1	0
								ADAM33	1	0
								TRAF6	1	1
								RNASET2	1	0
								CD247	1	0
								HAX1	1	0
								AIFM1	1	0
								PRKACA	1	0
								HDAC3	1	1
								PDE6B	1	0
								ATP5ME	1	0
								AFAP1-AS1	1	0
								MIR492	1	0
								LINC01772	1	0
								MIR513A1	1	0
								DOCK8	1	0
								MIR551A	1	0
								MROCKI	1	0
								KLRC1	1	1
								LTBR	1	0
								MCM7	1	0
								FOXM1	1	1
								CDT1	1	0
								WDR48	1	0
								TNFSF12	1	0
								KCNH2	1	0
								MIR181D	1	0
								PTMA	1	0
								NR4A1	1	1
								UBE2I	1	1
								P4HB	1	0
								CYP3A4	1	0
								CDC25B	1	0
								STRADB	1	0
								NEDD4	1	0
								ABI1	1	0
								TGFBR1	1	1
								POMGNT2	1	0
								MAP3K9	1	1
								ITGB4	1	0
								SRSF1	1	0
								IL1RAPL2	1	0
								HOXB13	1	1
								CPD	1	0
								MIR4706	1	0
								DNAH8	1	0
								ROCR	1	0
								GRP	1	0
								MIR197	1	0
								NUAK2	1	1
								IL13	1	1
								PDIA3	1	0
								CD40LG	1	1
								BATF2	1	1
								TIAM1	1	0
								EGLN2	1	0
								HSPA1A	1	1
								DTL	1	0
								CIB1	1	1
								E2F4	1	0
								DNA2	1	0
								TRIO	1	0
								ALPK3	1	0
								HK2	1	0
								RPSA	1	1
								IL4R	1	1
								TSPAN8	1	1
								GAB2	1	1
								RPS6KA1	1	0
								GLI3	1	0
								PSMB8	1	0
								VSIR	1	1
								ZEB2	1	1
								MIR590	1	1
								DCK	1	0
								EHMT2	1	0
								HMGA1	1	0
								LINC00472	1	0
								CALR	1	1
								ARHGAP45	1	0
								RHOD	1	0
								HAS2	1	0
								LIAT1	1	0
								LACTB	1	0
								REV1	1	0
								TBP	1	1
								CGA	1	0
								TNFRSF10C	1	1
								ADAR	1	1
								PROX1	1	0
								IFNE	1	0
								APOE	1	0
								TRRAP	1	1
								MDK	1	1
								CCNH	1	0
								DCST1-AS1	1	0
								HAVCR2	1	1
								PLXNB1	1	0
								MAP3K7	1	1
								ALDH1A1	1	1
								FOSL1	1	1
								RAD52	1	0
								CYP2B6	1	0
								ASAH1	1	1
								GADD45G	1	0
								DGCR5	1	0
								FHIT	1	0
								RRM1	1	0
								DHCR24	1	0
								ICOS	1	1
								IRS4	1	0
								PTPN13	1	0
								TNFRSF4	1	1
								HBEGF	1	0
								ADORA3	1	0
								CBL	1	0
								AP3B1	1	0
								BBC3	1	1
								CASP4	1	1
								INHBA	1	0
								CD151	1	0
								MIR361	1	0
								MAPK10	1	0
								OLIG2	1	0
								CTSH	1	0
								MIR378A	1	0
								FMN1	1	0
								RALY	1	1
								PDK1	1	1
								BCL2A1	1	1
								TPM3	1	0
								PRIMPOL	1	0
								VCP	1	1
								LIG4	1	0
								FLI1	1	1
								GC	1	1
								MGC16025	1	0
								SLC9A1	1	1
								SNHG33	1	0
								HSP90B1	1	1
								SPRY4	1	1
								SNORD118	1	0
								MNDA	1	0
								FLG	1	1
								PIN1	1	1
								HOTTIP	1	0
								PRKAA1	1	1
								HSF1	1	1
								CCL4	1	0
								NONO	1	0
								VTA1	1	0
								MAGEA13P	1	0
								LOC392435	1	0
								LOC100130052	1	0
								LOC100420228	1	0
								LOC100420245	1	0
								LOC100420334	1	0
								LOC100533669	1	0
								LOC392436	1	0
								LOC392440	1	0
								LOC392555	1	0
								LOC100420230	1	0
								LOC100420250	1	0
								LOC644893	1	0
								PTK6	1	0
								MDC1	1	0
								PTHLH	1	1
								F2RL1	1	1
								DMBT1	1	1
								CFL1	1	1
								HLA-DRA	1	0
								SELE	1	1
								EFNB2	1	0
								LZTS1	1	0
								PTPN3	1	0
								VDAC1	1	0
								KIR2DL3	1	0
								LAMA4	1	0
								PLEKHA5	1	1
								CUX1	1	1
								PIK3R3	1	0
								COL9A2	1	0
								PSMC2	1	0
								COL8A2	1	0
								AZU1	1	0
								PTN	1	1
								RAP1A	1	1
								CD74	1	1
								LUM	1	1
								CD99L2	1	0
								LHFPL3-AS1	1	0
								TYRO3	1	1
								CRH	1	1
								SQSTM1	1	1
								DUSP6	1	1
								CENPF	1	0
								MIR29B1	1	0
								SSX4	1	1
								PAGE5	1	0
								FES	1	0
								ESR2	1	1
								ETV4	1	1
								PGF	1	1
								TMSB4X	1	1
								HAS3	1	0
								CALML3	1	0
								DROSHA	1	0
								AREG	1	0
								NOTCH4	1	1
								ITCH	1	1
								PVR	1	1
								ANG	1	1
								SRY	1	0
								ULK2	1	0
								YES1	1	0
								CDC25C	1	0
								CCL15-CCL14	1	0
								C1QA	1	0
								TEK	1	1
								BASP1	1	0
								LIG1	1	0
								ADGRV1	1	0
								PHB1	1	0
								SNHG1	1	0
								THBS2	1	1
								ATF4	1	1
								GTF2H4	1	0
								VEGFB	1	0
								LDHB	1	0
								SEMA7A	1	0
								PRKCD	1	0
								RPL23A	1	0
								DMXL2	1	0
								PTPN14	1	0
								DDR1	1	1
								STAT5B	1	1
								S100A11	1	0
								HSP90AB1	1	0
								ATG5	1	1
								GTF2H1	1	1
								RARS1	1	0
								IL5	1	0
								DKK3	1	1
								CD47	1	1
								RCVRN	1	1
								STK3	1	0
								IFNAR1	1	1
								MIR451A	1	0
								CD81	1	1
								DLGAP1-AS2	1	0
								IRS1	1	0
								NTN1	1	1
								SPG7	1	1
								STIM1	1	0
								HSPD1	1	0
								BAG3	1	0
								RRM2	1	1
								TPX2	1	0
								RND3	1	1
								NR3C1	1	1
								MIR24-1	1	0
								EPOR	1	1
								HDGF	1	1
								JUND	1	1
								GFRA1	1	0
								SIRPA	1	0
								XPO1	1	1
								RPS6KA3	1	0
								INS	1	0
								SYK	1	1
								MIR625	1	0
								GREM1	1	0
								DFFA	1	0
								HRH2	1	0
								LINC00943	1	0
								RAN	1	0
								TGIF1	1	0
								LOC117693187	1	0
								UBE3A	1	0
								NOS1	1	1
								CDKAL1	1	1
								CCR9	1	1
								XAF1	1	0
[truncated: 3,202 more rows]

## Sheet: S3
The acquisition of ICI_gene
up-regulated	down-regulated	DEGs	ICI_gene
SLAMF6	DIPK1C	SLAMF6	TNF
SNX20	SLCO4A1-AS1	SNX20	CD38
BIN2	CA14	BIN2	ALOX5
ITGAL	LGI3	ITGAL	P2RY6
LCK	GPR143	LCK	SELP
IL21R	BCAN	IL21R	CASP1
VAV1	TYRP1	VAV1	ERAP2
IKZF1	PMEL	IKZF1	PTPN22
CYTIP	KIT	CYTIP	IDO1
TIGIT	KRT17	TIGIT	LAP3
SLA2	KRT14	SLA2	ITGA4
IKZF3	KRT6B	IKZF3	F13A1
CD2	OCA2	CD2	STAT1
CD247	KRT16	CD247	TLR4
P2RY10	KRT6C	P2RY10	ITK
SIRPG	KRTDAP	SIRPG	ZAP70
SIT1	S100A7	SIT1	CTSS
SASH3	KRT6A	SASH3	PLAU
NCKAP1L	SPRR1B	NCKAP1L	CCL4
SP140		SP140	IFNG
CD27		CD27	CXCL12
CD3G		CD3G	CCL8
PCED1B-AS1		PCED1B-AS1	MMP9
CD3E		CD3E	HMOX1
CD3D		CD3D	NFKBIA
SLA		SLA	CYP1B1
PTPRC		PTPRC	IGHG1
IL2RG		IL2RG	PIK3CG
APBB1IP		APBB1IP	PIM1
CD53		CD53	PRKCB
TAGAP		TAGAP	PTK2B
SH2D1A		SH2D1A	SYK
ARHGAP9		ARHGAP9
PTPN6		PTPN6
CD5		CD5
NCF1		NCF1
C16orf54		C16orf54
IL10RA		IL10RA
CCR5		CCR5
CORO1A		CORO1A
LILRB1		LILRB1
GBP5		GBP5
PLEK		PLEK
CD38		CD38
GIMAP4		GIMAP4
RASAL3		RASAL3
UBASH3A		UBASH3A
INPP5D		INPP5D
WAS		WAS
TRBC1		TRBC1
PLA2G2D		PLA2G2D
TRAC		TRAC
CXCR3		CXCR3
SCIMP		SCIMP
SPOCK2		SPOCK2
CD6		CD6
ARHGAP30		ARHGAP30
FGD2		FGD2
GNGT2		GNGT2
APOL3		APOL3
SIGLEC10		SIGLEC10
NCF1C		NCF1C
EVI2B		EVI2B
TNFRSF9		TNFRSF9
IRF8		IRF8
CD72		CD72
HCLS1		HCLS1
RHOH		RHOH
CXCL13		CXCL13
GZMA		GZMA
IL2RB		IL2RB
TRBC2		TRBC2
CRTAM		CRTAM
AOAH		AOAH
GZMK		GZMK
SELPLG		SELPLG
PCED1B		PCED1B
MYO1F		MYO1F
TBX21		TBX21
PTPN7		PTPN7
TRBV7-9		TRBV7-9
CD8A		CD8A
TNFAIP8L2		TNFAIP8L2
CD7		CD7
NCF1B		NCF1B
SPN		SPN
CSF2RB		CSF2RB
CCR2		CCR2
TBC1D10C		TBC1D10C
CD86		CD86
ACAP1		ACAP1
CXCR6		CXCR6
TRGC2		TRGC2
GPR171		GPR171
ZBP1		ZBP1
PDCD1		PDCD1
CALHM6		CALHM6
DOCK2		DOCK2
JAML		JAML
HLA-DMB		HLA-DMB
TRGV10		TRGV10
ITGB2		ITGB2
CD96		CD96
HSH2D		HSH2D
CD52		CD52
TESPA1		TESPA1
LILRB4		LILRB4
CYTH4		CYTH4
GIMAP1		GIMAP1
TRAF3IP3		TRAF3IP3
SLAMF8		SLAMF8
IL12RB1		IL12RB1
CCL5		CCL5
CARD11		CARD11
TRAV13-1		TRAV13-1
LAIR1		LAIR1
CD8B		CD8B
P2RY13		P2RY13
CD300LF		CD300LF
TRBV20-1		TRBV20-1
ABI3		ABI3
FASLG		FASLG
HCK		HCK
PSTPIP1		PSTPIP1
CXCL9		CXCL9
S1PR4		S1PR4
DOK2		DOK2
NCF4		NCF4
PRF1		PRF1
TLR8		TLR8
IL15RA		IL15RA
LAX1		LAX1
ICAM3		ICAM3
SAMSN1		SAMSN1
AIF1		AIF1
ADAMDEC1		ADAMDEC1
IL32		IL32
TRBV7-2		TRBV7-2
MYO1G		MYO1G
HAVCR2		HAVCR2
AL590764.1		AL590764.1
HLA-DQA1		HLA-DQA1
WDFY4		WDFY4
CD37		CD37
CD84		CD84
LAPTM5		LAPTM5
PARVG		PARVG
NKG7		NKG7
TRAV17		TRAV17
P2RY8		P2RY8
PTPN22		PTPN22
TRBV19		TRBV19
IRF1		IRF1
LCP1		LCP1
NFAM1		NFAM1
GIMAP7		GIMAP7
TRBV29-1		TRBV29-1
TNFRSF1B		TNFRSF1B
ICOS		ICOS
CCL4		CCL4
ARL11		ARL11
CD74		CD74
TRBV27		TRBV27
CXorf21		CXorf21
LILRB2		LILRB2
CYBB		CYBB
DAPP1		DAPP1
GIMAP6		GIMAP6
C1orf162		C1orf162
CCDC69		CCDC69
NAPSB		NAPSB
HLA-DOA		HLA-DOA
CD4		CD4
GPR65		GPR65
LTA		LTA
MFNG		MFNG
TRAV21		TRAV21
XCL2		XCL2
LAG3		LAG3
TRAV2		TRAV2
RCSD1		RCSD1
IGSF6		IGSF6
CD48		CD48
EBI3		EBI3
HLA-DRA		HLA-DRA
CD180		CD180
TRBV5-1		TRBV5-1
PTAFR		PTAFR
GZMB		GZMB
LST1		LST1
TRAV14DV4		TRAV14DV4
TRAT1		TRAT1
GPR174		GPR174
ARHGAP25		ARHGAP25
TRAV8-3		TRAV8-3
LY9		LY9
HLA-DPB1		HLA-DPB1
RASSF5		RASSF5
P2RY6		P2RY6
CTSW		CTSW
LTB		LTB
JCHAIN		JCHAIN
TRAV8-2		TRAV8-2
TRAV8-6		TRAV8-6
TRBV6-5		TRBV6-5
MPEG1		MPEG1
C1QA		C1QA
ADA2		ADA2
TRAV12-1		TRAV12-1
MS4A6A		MS4A6A
SPI1		SPI1
LINC01871		LINC01871
SLC7A7		SLC7A7
ZC3H12D		ZC3H12D
FTH1P22		FTH1P22
ITK		ITK
TRAV4		TRAV4
PDCD1LG2		PDCD1LG2
VNN2		VNN2
HCST		HCST
CCRL2		CCRL2
CLECL1		CLECL1
TMEM156		TMEM156
MNDA		MNDA
TRBV18		TRBV18
FGD3		FGD3
RAC2		RAC2
ADGRG5		ADGRG5
GZMH		GZMH
CD69		CD69
TNFSF8		TNFSF8
FCRL3		FCRL3
IL18BP		IL18BP
C1QB		C1QB
TRAV8-4		TRAV8-4
IFITM3P6		IFITM3P6
KLRB1		KLRB1
NCR3		NCR3
THEMIS		THEMIS
TRAV12-3		TRAV12-3
IL4I1		IL4I1
PIK3AP1		PIK3AP1
STAC3		STAC3
LINC02446		LINC02446
SIRPB2		SIRPB2
GPR132		GPR132
C1QC		C1QC
PIK3R5		PIK3R5
TRAV12-2		TRAV12-2
TRBV9		TRBV9
IDO1		IDO1
CXCR2P1		CXCR2P1
ALOX5		ALOX5
SELL		SELL
TRAV3		TRAV3
TRAV13-2		TRAV13-2
TRBV5-6		TRBV5-6
LY86		LY86
LSP1		LSP1
FGR		FGR
CLEC7A		CLEC7A
TRBV4-2		TRBV4-2
TRBJ2-7		TRBJ2-7
CLEC4E		CLEC4E
FCRL6		FCRL6
TMEM150B		TMEM150B
TRAV29DV5		TRAV29DV5
HLA-DRB1		HLA-DRB1
POU2AF1		POU2AF1
FCGR1A		FCGR1A
TRBV2		TRBV2
TMEM273		TMEM273
TRBD1		TRBD1
CTSS		CTSS
PIK3CG		PIK3CG
TAF5LP1		TAF5LP1
TRBJ1-5		TRBJ1-5
TFEC		TFEC
CD79A		CD79A
TRGC1		TRGC1
IL18		IL18
LAT2		LAT2
TMSB4X		TMSB4X
CIITA		CIITA
MZB1		MZB1
TRAV19		TRAV19
HNRNPA1P21		HNRNPA1P21
FMNL1		FMNL1
IL2RA		IL2RA
SIGLEC14		SIGLEC14
IGHM		IGHM
TRBV7-6		TRBV7-6
USP30-AS1		USP30-AS1
LINC01943		LINC01943
NCF2		NCF2
HLA-DPA1		HLA-DPA1
CCR7		CCR7
IL7R		IL7R
TRAV16		TRAV16
PILRA		PILRA
ZAP70		ZAP70
CCDC88B		CCDC88B
TMEM176B		TMEM176B
SUSD3		SUSD3
CCR5AS		CCR5AS
LINC01857		LINC01857
RNASE6		RNASE6
TLR7		TLR7
BLNK		BLNK
SECTM1		SECTM1
STAT4		STAT4
TYROBP		TYROBP
PIM2		PIM2
TRAV26-1		TRAV26-1
TNFRSF17		TNFRSF17
TRBV11-2		TRBV11-2
NLRC3		NLRC3
TRBV10-3		TRBV10-3
SOCS1		SOCS1
TRBV6-1		TRBV6-1
TNFAIP8		TNFAIP8
OR2I1P		OR2I1P
IRAG2		IRAG2
TRBV3-1		TRBV3-1
TRAV9-2		TRAV9-2
TRBJ1-6		TRBJ1-6
HLA-DQB1		HLA-DQB1
ZBED2		ZBED2
HK3		HK3
LILRB3		LILRB3
DENND1C		DENND1C
GIMAP8		GIMAP8
TRAV5		TRAV5
HLA-DOB		HLA-DOB
CLEC10A		CLEC10A
ITGB7		ITGB7
HLA-DMA		HLA-DMA
AC004847.1		AC004847.1
PLAAT4		PLAAT4
IGHV3-23		IGHV3-23
EPSTI1		EPSTI1
TRAV1-2		TRAV1-2
IFNG		IFNG
SIGLEC1		SIGLEC1
LYZ		LYZ
RAB37		RAB37
GAB3		GAB3
SEPTIN1		SEPTIN1
TRBV12-4		TRBV12-4
TRBV28		TRBV28
LY75		LY75
GVINP1		GVINP1
TRAV38-2DV8		TRAV38-2DV8
GBP4		GBP4
TRBV4-1		TRBV4-1
PRKCQ		PRKCQ
CARMIL2		CARMIL2
KCNA3		KCNA3
GCH1		GCH1
FOXP3		FOXP3
AC090559.1		AC090559.1
CEACAM21		CEACAM21
CMKLR1		CMKLR1
ITGB2-AS1		ITGB2-AS1
GPR18		GPR18
IGHV4-34		IGHV4-34
GBP1		GBP1
LINC02416		LINC02416
ANKRD22		ANKRD22
LRRC25		LRRC25
AC018755.4		AC018755.4
GMFG		GMFG
ADAM28		ADAM28
XCR1		XCR1
JAK3		JAK3
TRAV27		TRAV27
TRAV23DV6		TRAV23DV6
IGKJ1		IGKJ1
AC243960.1		AC243960.1
MAP4K1		MAP4K1
BTK		BTK
IPCEF1		IPCEF1
CXCL10		CXCL10
UCP2		UCP2
CD300A		CD300A
TRBV5-4		TRBV5-4
TRBV6-6		TRBV6-6
AKNA		AKNA
LGALS2		LGALS2
TRBV6-2		TRBV6-2
SOWAHD		SOWAHD
CST7		CST7
IGHV3-7		IGHV3-7
KLHDC7B		KLHDC7B
AL365361.1		AL365361.1
IGKV4-1		IGKV4-1
BTLA		BTLA
PSD4		PSD4
POU2F2		POU2F2
IGKV3-11		IGKV3-11
DOCK8		DOCK8
PRDM1		PRDM1
PTGER4		PTGER4
MIR4539		MIR4539
TRAV8-1		TRAV8-1
DNAJC5B		DNAJC5B
TRAV26-2		TRAV26-2
CSF1R		CSF1R
GGTA1		GGTA1
TRBJ2-3		TRBJ2-3
PTK2B		PTK2B
SIGLEC9		SIGLEC9
TRBJ2-1		TRBJ2-1
IGHV1-18		IGHV1-18
AC133644.1		AC133644.1
IGHG3		IGHG3
CCR4		CCR4
LINC02528		LINC02528
TMEM176A		TMEM176A
ZNF831		ZNF831
TMC8		TMC8
TIMD4		TIMD4
ARHGDIB		ARHGDIB
RASSF4		RASSF4
TRAV24		TRAV24
IGHV3-21		IGHV3-21
FCGR3A		FCGR3A
IGLV1-47		IGLV1-47
VSIR		VSIR
TRDV1		TRDV1
IGHV3-74		IGHV3-74
AC015911.3		AC015911.3
CXCL11		CXCL11
NLRC5		NLRC5
IGKV1-16		IGKV1-16
IGHV3-49		IGHV3-49
SIGLEC7		SIGLEC7
IGHJ3P		IGHJ3P
PTGER2		PTGER2
SEMA4D		SEMA4D
TRGV7		TRGV7
IGLV2-11		IGLV2-11
TRAV36DV7		TRAV36DV7
DPEP2		DPEP2
TRAV35		TRAV35
MS4A4A		MS4A4A
IGLV3-1		IGLV3-1
IGLV1-40		IGLV1-40
ASCL2		ASCL2
IGKV3-20		IGKV3-20
IGLV2-23		IGLV2-23
IGLV2-14		IGLV2-14
PSMB9		PSMB9
IGLC2		IGLC2
IGKV1-5		IGKV1-5
RGS18		RGS18
ZBTB32		ZBTB32
STAP1		STAP1
IGKJ4		IGKJ4
IGHV6-1		IGHV6-1
IGHJ5		IGHJ5
LGALS9		LGALS9
IGKV3-15		IGKV3-15
IGHV3-30		IGHV3-30
AC008875.3		AC008875.3
IGKV1-12		IGKV1-12
AC015819.1		AC015819.1
MEI1		MEI1
FLI1		FLI1
TRBV15		TRBV15
FCRL5		FCRL5
IGKV2-30		IGKV2-30
FUT7		FUT7
SEMA4A		SEMA4A
AL121933.2		AL121933.2
HSD11B1		HSD11B1
TRAV6		TRAV6
TRAV22		TRAV22
IGKJ5		IGKJ5
NUGGC		NUGGC
CCL4L2		CCL4L2
CD274		CD274
FPR3		FPR3
IGHV5-51		IGHV5-51
IGKC		IGKC
IGHV3-15		IGHV3-15
IGLV1-44		IGLV1-44
TNFSF10		TNFSF10
SIRPB1		SIRPB1
P2RX1		P2RX1
SYTL3		SYTL3
APOL1		APOL1
IGHV3-33		IGHV3-33
CD300C		CD300C
PARP15		PARP15
VCAM1		VCAM1
SRGN		SRGN
IGHV4-59		IGHV4-59
IGHV4-39		IGHV4-39
BCL11B		BCL11B
XCL1		XCL1
TRAV20		TRAV20
IGHGP		IGHGP
IGHV1-46		IGHV1-46
CSF3R		CSF3R
CD40LG		CD40LG
HLA-DRB5		HLA-DRB5
C3AR1		C3AR1
IGLL5		IGLL5
TRAV41		TRAV41
IGHV3-48		IGHV3-48
IGKV2-24		IGKV2-24
ETV7		ETV7
CD40		CD40
ZNF683		ZNF683
GPR183		GPR183
PYHIN1		PYHIN1
IGLV3-19		IGLV3-19
IGLV3-25		IGLV3-25
IGLV2-8		IGLV2-8
IGHV3-73		IGHV3-73
IGHG1		IGHG1
IGKV1-17		IGKV1-17
TOMM20P2		TOMM20P2
ITGAM		ITGAM
IGLV6-57		IGLV6-57
DOK3		DOK3
TRBV14		TRBV14
FCGR1CP		FCGR1CP
GNLY		GNLY
CD28		CD28
IGKV1-6		IGKV1-6
TRDC		TRDC
IGKV1-9		IGKV1-9
TOX		TOX
MS4A1		MS4A1
PLAC8		PLAC8
PRR33		PRR33
PSMB10		PSMB10
LYN		LYN
RASGRP1		RASGRP1
TNFRSF18		TNFRSF18
GBP1P1		GBP1P1
IGKV3D-11		IGKV3D-11
TRIM22		TRIM22
C19orf38		C19orf38
PRKCB		PRKCB
SPIB		SPIB
TRBV7-3		TRBV7-3
IGHG2		IGHG2
DEF6		DEF6
FGL2		FGL2
EAF2		EAF2
GBP2		GBP2
SLCO2B1		SLCO2B1
FYB1		FYB1
APOBR		APOBR
TRBJ1-4		TRBJ1-4
IGKV1-8		IGKV1-8
CD19		CD19
TRBV13		TRBV13
LILRA6		LILRA6
ADAP2		ADAP2
BIRC3		BIRC3
SLC9A9		SLC9A9
CXCR4		CXCR4
IGLV4-69		IGLV4-69
CCL8		CCL8
IGHV4-28		IGHV4-28
AC004687.1		AC004687.1
TRAV10		TRAV10
AL133371.2		AL133371.2
PIK3R6		PIK3R6
ACSL5		ACSL5
TRAV25		TRAV25
PPIAP45		PPIAP45
TRBV12-3		TRBV12-3
CCL19		CCL19
IGKV3OR2-268		IGKV3OR2-268
IGLC3		IGLC3
ST8SIA4		ST8SIA4
KIR2DL4		KIR2DL4
HVCN1		HVCN1
CD14		CD14
PNOC		PNOC
CR1		CR1
IGHV3-69-1		IGHV3-69-1
IGHV2-5		IGHV2-5
IGLV2-18		IGLV2-18
FCN1		FCN1
ITM2A		ITM2A
AKAP5		AKAP5
CD244		CD244
SLAMF7		SLAMF7
PRAM1		PRAM1
TRBJ1-2		TRBJ1-2
MIR4537		MIR4537
AC138207.5		AC138207.5
IGHJ4		IGHJ4
LPAR5		LPAR5
IGKV3D-20		IGKV3D-20
IGHV1-69D		IGHV1-69D
IGHV4-31		IGHV4-31
TNFAIP2		TNFAIP2
SAMHD1		SAMHD1
FCER1G		FCER1G
PLD4		PLD4
IGHV3-11		IGHV3-11
TRBJ1-1		TRBJ1-1
ADGRE1		ADGRE1
CCR1		CCR1
IGHA1		IGHA1
ALOX5AP		ALOX5AP
SLAMF1		SLAMF1
IGHJ3		IGHJ3
CD200R1		CD200R1
IGHV3-13		IGHV3-13
FBP1		FBP1
RASGRP2		RASGRP2
TRBJ1-3		TRBJ1-3
HLA-DRB6		HLA-DRB6
AC015911.7		AC015911.7
SERPINA1		SERPINA1
APOL6		APOL6
IGLV3-21		IGLV3-21
CCND2		CCND2
C11orf21		C11orf21
MIR155HG		MIR155HG
TLR10		TLR10
APOL4		APOL4
AC012236.1		AC012236.1
IGKJ3		IGKJ3
MARCHF1		MARCHF1
GIMAP2		GIMAP2
TNFSF13B		TNFSF13B
CD1D		CD1D
IGLV7-43		IGLV7-43
IGHV4-61		IGHV4-61
TENT5C		TENT5C
STX11		STX11
IGHV2-70		IGHV2-70
CD163		CD163
CLEC12A		CLEC12A
IGHV2-26		IGHV2-26
IGHJ6		IGHJ6
SLC15A3		SLC15A3
HCP5		HCP5
IGKV1-27		IGKV1-27
IGHV3-53		IGHV3-53
IGLV8-61		IGLV8-61
IGHV4-4		IGHV4-4
SLC2A5		SLC2A5
GAPT		GAPT
SIGLEC8		SIGLEC8
APOBEC3G		APOBEC3G
LAMP3		LAMP3
PPP1R16B		PPP1R16B
IGKV2D-29		IGKV2D-29
HLA-B		HLA-B
PLA2G7		PLA2G7
TOX2		TOX2
PLCG2		PLCG2
IGLV3-9		IGLV3-9
TRBJ2-2P		TRBJ2-2P
AC026369.3		AC026369.3
FAM30A		FAM30A
HLA-DQB2		HLA-DQB2
IGLV3-10		IGLV3-10
AMPD3		AMPD3
IGHV1-24		IGHV1-24
TRANK1		TRANK1
IGHV3-72		IGHV3-72
AC004585.1		AC004585.1
GATA3		GATA3
LCP2		LCP2
IGHV5-78		IGHV5-78
NUAK2		NUAK2
LMO2		LMO2
TRBJ2-2		TRBJ2-2
TRBJ2-6		TRBJ2-6
TNF		TNF
SYK		SYK
VSIG4		VSIG4
IGHV1-3		IGHV1-3
ICAM2		ICAM2
IGHD3-3		IGHD3-3
TRBV30		TRBV30
IGHD		IGHD
CASP10		CASP10
IGKV1D-8		IGKV1D-8
OSCAR		OSCAR
C3		C3
LINC00861		LINC00861
ATP2A3		ATP2A3
IRF5		IRF5
IGLV2-5		IGLV2-5
IGLC6		IGLC6
LILRA4		LILRA4
IGKV1-39		IGKV1-39
FPR1		FPR1
ARHGAP45		ARHGAP45
NOD2		NOD2
IGLV7-46		IGLV7-46
IGHA2		IGHA2
IGLV1-36		IGLV1-36
TRBV5-5		TRBV5-5
IGLV3-27		IGLV3-27
LILRA5		LILRA5
C1orf54		C1orf54
CCDC88C		CCDC88C
IGKV3D-15		IGKV3D-15
OTULINL		OTULINL
IGLV9-49		IGLV9-49
TCL1A		TCL1A
HLA-DQA2		HLA-DQA2
IGHV3OR16-9		IGHV3OR16-9
IGHJ1		IGHJ1
APOBEC3H		APOBEC3H
BANK1		BANK1
MLKL		MLKL
IGHV1-2		IGHV1-2
AC145098.1		AC145098.1
NFKBIA		NFKBIA
IGHV3-66		IGHV3-66
MIR4538		MIR4538
SMCO4		SMCO4
GFI1		GFI1
PARP12		PARP12
AGAP2		AGAP2
HLA-DPB2		HLA-DPB2
IGHV3-64D		IGHV3-64D
TNFRSF13B		TNFRSF13B
DERL3		DERL3
GLRX		GLRX
CCL3		CCL3
BASP1		BASP1
STAT1		STAT1
B2M		B2M
IGLJ2		IGLJ2
IGKV3-7		IGKV3-7
PSMB8-AS1		PSMB8-AS1
SUCNR1		SUCNR1
IGKV1OR2-108		IGKV1OR2-108
IGLV5-45		IGLV5-45
IGKV1D-16		IGKV1D-16
RBP5		RBP5
CD1C		CD1C
CXCL12		CXCL12
SERPING1		SERPING1
HLA-E		HLA-E
HLA-F		HLA-F
ITGAX		ITGAX
CHST15		CHST15
AC142381.1		AC142381.1
SQOR		SQOR
ELMO1		ELMO1
MAN1A1		MAN1A1
TYMP		TYMP
TMEM37		TMEM37
DENND2D		DENND2D
IGHV1OR15-2		IGHV1OR15-2
JSRP1		JSRP1
IGKV2D-40		IGKV2D-40
CSF1		CSF1
IGHG4		IGHG4
UBE2L6		UBE2L6
C1S		C1S
CCL2		CCL2
LINC01215		LINC01215
IGHV3-20		IGHV3-20
IGLV10-54		IGLV10-54
CYRIA		CYRIA
IGHJ2		IGHJ2
IGHV4-55		IGHV4-55
MS4A7		MS4A7
BATF		BATF
TAP1		TAP1
SH2D3C		SH2D3C
PSTPIP2		PSTPIP2
PARP14		PARP14
AL357033.4		AL357033.4
UBA7		UBA7
OASL		OASL
SH2D2A		SH2D2A
RFTN1		RFTN1
CAMK1D		CAMK1D
C2		C2
DBH-AS1		DBH-AS1
IGKV1D-39		IGKV1D-39
IGHV4-80		IGHV4-80
IGHV3OR16-13		IGHV3OR16-13
TMSB4XP8		TMSB4XP8
SLC43A2		SLC43A2
PECAM1		PECAM1
GPR84		GPR84
MSR1		MSR1
MYO7A		MYO7A
ADAM8		ADAM8
SAMD9L		SAMD9L
IGHV3-71		IGHV3-71
PIK3IP1		PIK3IP1
KLHL6		KLHL6
VPREB3		VPREB3
RARRES1		RARRES1
MRC1		MRC1
EMB		EMB
IGHD3-9		IGHD3-9
IGHV1-69		IGHV1-69
FCHO1		FCHO1
BLK		BLK
NR1H3		NR1H3
IGKV5-2		IGKV5-2
SEPTIN6		SEPTIN6
IGHV3-64		IGHV3-64
MILR1		MILR1
SOD2		SOD2
NMI		NMI
HLA-DQB1-AS1		HLA-DQB1-AS1
HLA-C		HLA-C
CD209		CD209
STK17B		STK17B
NLRP1		NLRP1
C1R		C1R
BTG2		BTG2
SKAP1		SKAP1
IGKV1OR2-6		IGKV1OR2-6
IGKV1D-12		IGKV1D-12
IGHV2-70D		IGHV2-70D
GP1BA		GP1BA
IGHV3OR15-7		IGHV3OR15-7
CLEC17A		CLEC17A
RNASE2		RNASE2
CCL22		CCL22
IGHV3-43		IGHV3-43
RBM47		RBM47
BHLHA15		BHLHA15
CLIC2		CLIC2
GZMM		GZMM
TRBJ2-4		TRBJ2-4
TRBJ2-5		TRBJ2-5
CEBPA		CEBPA
IGKV1-33		IGKV1-33
IGHV3OR16-8		IGHV3OR16-8
CR2		CR2
IGLV3-16		IGLV3-16
ADORA3		ADORA3
BTN3A3		BTN3A3
MIR5195		MIR5195
VOPP1		VOPP1
CD33		CD33
IGHV3-62		IGHV3-62
CXCL16		CXCL16
FCER2		FCER2
IGHV1OR15-9		IGHV1OR15-9
TLR4		TLR4
PAX5		PAX5
SYTL1		SYTL1
AC034105.1		AC034105.1
GCNT1		GCNT1
TGM2		TGM2
P2RX5		P2RX5
PLEKHO1		PLEKHO1
IGLV2-28		IGLV2-28
MAFB		MAFB
IGKV6-21		IGKV6-21
DRAM1		DRAM1
MARCO		MARCO
EVL		EVL
EVI2A		EVI2A
FERMT3		FERMT3
IGHV1-58		IGHV1-58
IGKV2-28		IGKV2-28
PLCL2		PLCL2
IGLC7		IGLC7
AIM2		AIM2
UNC13D		UNC13D
PIM1		PIM1
CD79B		CD79B
AC134879.2		AC134879.2
GLIPR1		GLIPR1
CCL3L3		CCL3L3
MCUB		MCUB
IGKV2D-28		IGKV2D-28
FCRL1		FCRL1
OAS2		OAS2
IGHD2-2		IGHD2-2
GBP3		GBP3
DUSP2		DUSP2
XAF1		XAF1
BTN3A1		BTN3A1
FOLR2		FOLR2
IGLV2-34		IGLV2-34
STAB1		STAB1
GLIPR2		GLIPR2
HLA-DRB9		HLA-DRB9
TLR2		TLR2
AC135068.3		AC135068.3
GPR34		GPR34
DPYD		DPYD
SEL1L3		SEL1L3
PSMB8		PSMB8
IGKV1D-33		IGKV1D-33
IGKV2D-30		IGKV2D-30
PLCB2		PLCB2
IGLV4-60		IGLV4-60
IGLV3-12		IGLV3-12
FAM107B		FAM107B
LAP3		LAP3
NIBAN3		NIBAN3
CLEC2D		CLEC2D
DTX3L		DTX3L
ACY3		ACY3
PARP9		PARP9
VAMP8		VAMP8
DNASE1L3		DNASE1L3
RSAD2		RSAD2
IGHV5-10-1		IGHV5-10-1
C5AR1		C5AR1
IGLV1-50		IGLV1-50
AC103563.1		AC103563.1
IGKV2OR22-4		IGKV2OR22-4
VAMP5		VAMP5
HAPLN3		HAPLN3
C15orf48		C15orf48
CTLA4		CTLA4
IGKV2D-24		IGKV2D-24
IGHV1-67		IGHV1-67
OAS1		OAS1
IGLV1-51		IGLV1-51
HAMP		HAMP
PTPRE		PTPRE
SERPINB9		SERPINB9
AC136428.1		AC136428.1
GNA15		GNA15
ANO9		ANO9
ARHGAP15		ARHGAP15
KIF21B		KIF21B
CCL21		CCL21
ARL4C		ARL4C
SLC40A1		SLC40A1
IGKV1D-43		IGKV1D-43
SLFN11		SLFN11
ALDH2		ALDH2
THEMIS2		THEMIS2
IGHD6-25		IGHD6-25
IGHV3-19		IGHV3-19
TNFRSF4		TNFRSF4
TREM2		TREM2
CMPK2		CMPK2
IGHV3-63		IGHV3-63
GRAP2		GRAP2
CYP1B1		CYP1B1
ARHGAP4		ARHGAP4
IGKV2-29		IGKV2-29
IFI44L		IFI44L
IFIH1		IFIH1
SP140L		SP140L
IGHD3-22		IGHD3-22
PLXDC2		PLXDC2
GALM		GALM
FDCSP		FDCSP
CRYBG1		CRYBG1
IL34		IL34
TRBV24-1		TRBV24-1
ABCG1		ABCG1
IGLV5-37		IGLV5-37
SLC46A3		SLC46A3
HLA-H		HLA-H
TNFAIP3		TNFAIP3
IGKV1D-13		IGKV1D-13
BATF2		BATF2
SLC1A3		SLC1A3
RTN1		RTN1
AC241585.1		AC241585.1
DOCK11		DOCK11
TBXAS1		TBXAS1
IGKV1D-17		IGKV1D-17
GPR68		GPR68
AC136475.3		AC136475.3
DDX60		DDX60
LPXN		LPXN
ABI3BP		ABI3BP
OLR1		OLR1
AL353807.5		AL353807.5
IGKV1-13		IGKV1-13
AC245884.12		AC245884.12
TNFRSF13C		TNFRSF13C
EOMES		EOMES
IFIT3		IFIT3
WARS1		WARS1
LBH		LBH
MMP9		MMP9
IFIT2		IFIT2
CLU		CLU
CSF2RA		CSF2RA
CFH		CFH
SELP		SELP
EFEMP1		EFEMP1
IGHV1-12		IGHV1-12
IGKV6D-21		IGKV6D-21
IFITM1		IFITM1
WIPF1		WIPF1
DHRS3		DHRS3
IGLV1-41		IGLV1-41
C7		C7
CLSTN3		CLSTN3
IGHV7-4-1		IGHV7-4-1
CD5L		CD5L
GADD45G		GADD45G
RAB20		RAB20
FCGR2A		FCGR2A
HMOX1		HMOX1
PLBD1		PLBD1
SLC38A1		SLC38A1
RARRES2		RARRES2
BICDL1		BICDL1
FAM20A		FAM20A
IL33		IL33
BST2		BST2
ARHGEF6		ARHGEF6
OAS3		OAS3
KIAA0040		KIAA0040
CHI3L2		CHI3L2
CHI3L1		CHI3L1
ISG15		ISG15
ITGA4		ITGA4
IGHV1-45		IGHV1-45
PLAU		PLAU
SULF1		SULF1
SELENOP		SELENOP
FCMR		FCMR
TUBA4A		TUBA4A
MX1		MX1
MMP12		MMP12
TRAF1		TRAF1
METTL7A		METTL7A
ISG20		ISG20
AMIGO2		AMIGO2
ADAM19		ADAM19
ADRA2A		ADRA2A
IGHV1-69-2		IGHV1-69-2
PDPN		PDPN
DEPP1		DEPP1
CETP		CETP
AXL		AXL
CHIT1		CHIT1
CFD		CFD
IFI44		IFI44
TMEM119		TMEM119
CCL13		CCL13
FKBP5		FKBP5
IFI27		IFI27
TSTD1		TSTD1
ERAP2		ERAP2
CASP1		CASP1
G0S2		G0S2
CD22		CD22
ACKR1		ACKR1
CLIC3		CLIC3
F13A1		F13A1
MFAP4		MFAP4
NIBAN1		NIBAN1
LUM		LUM
APOC1		APOC1
RGS1		RGS1
KCNJ10		KCNJ10
HSPA7		HSPA7
FMOD		FMOD
SFRP4		SFRP4
CAPG		CAPG
PAGE5		PAGE5
SFRP1		SFRP1
		DIPK1C
		SLCO4A1-AS1
		CA14
		LGI3
		GPR143
		BCAN
		TYRP1
		PMEL
		KIT
		KRT17
		KRT14
		KRT6B
		OCA2
		KRT16
		KRT6C
		KRTDAP
		S100A7
		KRT6A
		SPRR1B

## Sheet: S4
GO analysis						KEGG analysis				GO(BP)/KEGG analysis
Term	gene.ratio	log10FDR	Counts	group		Pathway	Counts	log10FDR		Category	Term	Log10FDR	Symbols	InTerm_InList
receptor complex	0.15625	-1.84302	5	CC		NF-kappa B signaling pathway	9	-12.363		GO Biological Processes	chemokine-mediated signaling pathway	-2.55827	PTK2B,CCL8,CXCL12	3/84
plasma membrane signaling receptor complex	0.125	-1.69359	4	CC		Chemokine signaling pathway	9	-10.2219		GO Biological Processes	response to chemokine	-2.55827	PTK2B,CCL8,CXCL12	3/92
side of membrane	0.25	-3.98546	8	CC		Leishmaniasis	7	-9.78071		GO Biological Processes	cellular response to chemokine	-2.55827	PTK2B,CCL8,CXCL12	3/92
external side of plasma membrane	0.1875	-3.39162	6	CC		Coronavirus disease - COVID-19	9	-9.78071		GO Biological Processes	positive regulation of leukocyte migration	-2.25557	PTK2B,CCL8,CXCL12	3/149
perinuclear region of cytoplasm	0.1875	-2.14439	6	CC		Toxoplasmosis	7	-8.78996		GO Biological Processes	positive regulation of cell migration	-2.25557	PTK2B,PLAU,CCL8,CXCL12	4/579
positive regulation of cell migration	0.46875	-12.9295	15	BP		Yersinia infection	7	-8.22137		GO Biological Processes	positive regulation of cell motility	-2.25557	PTK2B,PLAU,CCL8,CXCL12	4/606
positive regulation of cell motility	0.46875	-12.9295	15	BP		Hepatitis B	7	-7.77603		GO Biological Processes	positive regulation of locomotion	-2.25557	PTK2B,PLAU,CCL8,CXCL12	4/620
positive regulation of locomotion	0.46875	-12.9295	15	BP		Influenza A	7	-7.66945		KEGG Pathway	Chemokine signaling pathway	-2.02146	PTK2B,CCL8,CXCL12	3/192
positive regulation of response to external stimulus	0.4375	-12.0861	14	BP		Leukocyte transendothelial migration	6	-7.06289		GO Biological Processes	regulation of leukocyte migration	-1.83743	PTK2B,CCL8,CXCL12	3/230
immune response-activating signaling pathway	0.375	-11.9885	12	BP		Natural killer cell mediated cytotoxicity	6	-6.74731		GO Biological Processes	positive regulation of growth	-1.73885	PTK2B,PIM1,CXCL12	3/257
cytokine receptor binding	0.21875	-5.38423	7	MF		Tuberculosis	6	-5.9824
protein kinase activity	0.25	-4.64503	8	MF		PD-L1 expression and PD-1 checkpoint pathway in cancer	5	-5.96132
non-membrane spanning protein tyrosine kinase activity	0.125	-4.51305	4	MF		African trypanosomiasis	4	-5.77591
phosphotransferase activity, alcohol group as acceptor	0.25	-4.18327	8	MF		Pathways in cancer	8	-5.77591
kinase activity	0.25	-3.99535	8	MF		C-type lectin receptor signaling pathway	5	-5.71759
						Lipid and atherosclerosis	6	-5.6897
						Toll-like receptor signaling pathway	5	-5.6897
						Human cytomegalovirus infection	6	-5.62187
						T cell receptor signaling pathway	5	-5.49096
						Malaria	4	-5.39254

## Sheet: S5
Univariate COX regression
target	p.value	HR (95% CI for HR)
IGHG1	3.4e-05	0.93 (0.9-0.96)
STAT1	1.2e-07	0.77 (0.7-0.85)
MMP9	0.023	0.93 (0.88-0.99)
LAP3	1.1e-07	0.72 (0.64-0.81)
HMOX1	0.49	1 (0.94-1.2)
CTSS	1.3e-05	0.83 (0.76-0.9)
NFKBIA	2.7e-05	0.71 (0.6-0.83)
PLAU	0.23	0.94 (0.85-1)
CASP1	0.065	0.93 (0.86-1)
CXCL12	0.014	0.9 (0.82-0.98)
PIM1	0.11	0.9 (0.79-1)
ERAP2	4.9e-05	0.86 (0.8-0.93)
F13A1	0.42	0.97 (0.9-1)
CCL4	2.5e-08	0.79 (0.73-0.86)
SYK	0.055	0.91 (0.83-1)
IDO1	4.8e-08	0.82 (0.76-0.88)
CCL8	2.6e-09	0.79 (0.73-0.85)
PTK2B	2.3e-05	0.73 (0.63-0.84)
ALOX5	1.2e-05	0.8 (0.72-0.88)
ITGA4	0.028	0.91 (0.83-0.99)
CYP1B1	0.015	0.88 (0.8-0.98)
ZAP70	0.00019	0.84 (0.77-0.92)
CD38	4.1e-08	0.78 (0.71-0.85)
PRKCB	0.031	0.9 (0.81-0.99)
P2RY6	9e-06	0.74 (0.65-0.85)
TLR4	4.6e-05	0.77 (0.68-0.87)
PIK3CG	1.9e-05	0.78 (0.69-0.87)
SELP	0.51	0.97 (0.87-1.1)
ITK	7.7e-05	0.79 (0.71-0.89)
PTPN22	4.1e-07	0.72 (0.63-0.82)
IFNG	8.1e-07	0.76 (0.68-0.84)
TNF	0.00052	0.77 (0.66-0.89)

## Sheet: S6
Immune Checkpoint Expression
SampleID	risk	LAG3	VSIR	HAVCR2	PDCD1	CTLA4	TIGIT	CD274	PDCD1LG2	SIGLEC7	BTLA
TCGA_DA_A1I8	low	1.17747	4.97004	4.94865	0.514198	2.38427	0.475292	1.17639	1.40637	2.61946	0.121413
TCGA_WE_A8ZT	low	1.25942	3.37772	1.5103	1.05471	1.18066	1.65586	3.13379	1.3293	0.678342	1.03907
TCGA_D3_A8GR	high	1.06791	2.43946	1.79568	0.313942	0.689478	0.238053	2.10963	0.474462	0.321466	0.028852
TCGA_BF_A5EO	high	4.11346	4.35468	3.52036	3.42399	1.75232	1.55861	1.5633	0.722204	1.17434	0.173383
TCGA_ER_A19T	high	1.86548	2.87721	1.74252	0.151989	0.1956	0.0717627	0.317188	1.34107	0.846874	0.119157
TCGA_ER_A19N	low	4.4296	5.70558	6.02069	4.34946	2.53513	3.62499	2.94815	3.77592	3.9125	1.72006
TCGA_EE_A29P	low	6.41936	4.99419	5.92722	5.57861	2.9777	4.65691	3.41269	4.01519	3.1395	2.34395
TCGA_EE_A29N	low	4.08268	4.76143	4.76846	3.31352	3.79164	3.83261	3.67158	3.24629	2.2135	2.30138
TCGA_ER_A2NF	high	3.65613	4.25886	3.40313	3.61261	1.77446	3.11798	2.49999	3.52822	1.55154	1.40327
TCGA_GN_A8LN	low	2.40833	3.66532	3.87584	1.08038	1.25308	0.951439	2.10434	1.54705	1.64874	0.175684
TCGA_FS_A1ZZ	low	1.0842	2.735	2.13872	0.752406	0.301236	0.315914	1.84024	1.90577	0.314058	0.224287
TCGA_ER_A19A	low	6.72166	6.99759	7.02096	5.94634	4.62232	5.04463	4.81561	5.72588	4.15198	2.99931
TCGA_D3_A3MV	low	1.59875	4.23337	3.21652	0.550211	2.71785	0.305095	0.806035	1.34369	2.0125	0.155231
TCGA_ER_A19H	low	5.13593	4.87771	4.38871	4.24304	2.6094	3.7891	2.58996	3.15939	2.31008	1.62316
TCGA_EE_A3AD	low	0.693677	2.86021	1.46587	0.238787	0.371726	0.29537	1.30434	1.43659	0.317651	0
TCGA_FS_A1ZW	low	3.64774	3.68091	4.39404	1.33308	2.99201	3.26156	3.03536	3.3608	1.63022	1.91
TCGA_DA_A3F8	low	8.05334	6.02336	6.5478	6.49168	4.85888	5.99468	5.52512	4.1833	3.84845	3.15666
TCGA_D3_A1Q6	high	2.39895	4.65822	3.71752	1.09896	4.70185	2.02215	1.69751	1.92782	1.07114	0.402286
TCGA_ER_A199	low	5.72834	5.02915	5.0294	4.20306	3.08224	4.60719	2.92723	2.61967	3.10839	2.94276
TCGA_D3_A51N	low	3.0452	4.5482	3.60164	2.47301	2.0783	1.78102	2.71736	2.2852	1.6783	0.38637
TCGA_FR_A729	low	6.67623	4.93379	5.12416	5.46711	3.71639	4.53174	3.41846	3.44544	3.20145	2.78877
TCGA_DA_A3F5	high	2.02205	4.42909	3.08767	1.39671	5.66696	1.01006	1.34102	1.10883	1.05492	0.0946415
TCGA_D3_A8GS	low	5.97878	4.39895	4.58636	3.98023	2.69071	3.22714	2.4551	1.81348	2.06967	0.958583
TCGA_D3_A2JD	high	2.31113	5.06312	3.03295	2.82375	5.4314	1.8908	1.47503	1.13921	1.334	1.79431
TCGA_BF_A1PV	high	0.993421	2.71736	2.37643	0.718263	0.624803	0.420617	1.31615	1.92915	0.760264	0.169797
TCGA_EB_A24C	high	0.574925	3.21739	2.55272	0.259182	0.495593	0.346078	1.03921	1.37362	0.489646	0.0996318
TCGA_GN_A4U7	high	0.269392	1.43526	0.844064	0.146395	2.90107	0.0825664	0.888149	0.102591	0.0919367	0.0526941
TCGA_EB_A5SE	high	1.56418	3.19827	2.02662	1.04355	0.664483	0.838185	2.25045	0.801986	0.627327	0.230695
TCGA_BF_A3DN	low	1.14789	4.36011	2.30775	0.840443	0.690998	0.776778	2.21167	1.63951	0.879314	0.431249
TCGA_EB_A44N	high	2.26604	4.95719	2.74726	2.73728	2.345	2.6546	2.06647	2.00917	0.707701	1.3352
TCGA_BF_A5ER	high	0.552279	2.3729	1.40021	0.272262	0.584482	0.0461418	0.776694	0.276913	0.431676	0.0467006
TCGA_EB_A5VU	high	2.28457	3.8068	2.98972	0.49252	0.399445	0.418136	1.09464	1.22243	1.85503	0.171335
TCGA_EB_A299	high	3.38334	6.54699	2.81709	2.57287	1.60516	2.0213	1.68545	1.41808	0.589859	0.605305
TCGA_EB_A6L9	low	4.67085	5.52071	3.64084	3.87518	2.28845	3.2997	2.08726	2.21431	1.94032	2.07025
TCGA_FS_A1ZQ	high	2.22642	3.89093	3.42695	1.63622	4.84948	1.35581	1.54275	1.03907	1.85539	0.258941
TCGA_D3_A5GL	high	1.10521	2.22243	2.29719	0.829281	0.242084	0.341872	2.04977	0.692606	0.711759	0.148348
TCGA_EE_A180	low	2.65597	2.77772	3.00626	1.45497	3.10419	1.02184	2.49549	1.45217	1.22688	0.325271
TCGA_WE_A8ZQ	high	0.657366	3.72164	2.17957	0.163756	0.109026	0.319849	0.726221	0.870976	0.410233	0.328722
TCGA_EE_A29V	high	0.569491	3.08665	1.65278	0.403159	1.07437	0.187514	1.23744	0.669752	0.295723	0.0659858
TCGA_EE_A2MQ	high	1.99722	3.64149	3.83127	1.93648	5.54646	1.69608	3.13319	2.894	1.771	0.43957
TCGA_EE_A3JD	low	5.79656	5.39486	6.09286	4.45267	4.12051	4.93151	4.05126	4.34997	3.21771	4.03997
TCGA_ER_A19C	high	0.815411	2.7231	2.65439	0.46999	4.22055	0.358171	1.1877	1.56116	1.07847	0.188781
TCGA_D3_A2JB	low	5.13091	5.69367	4.32542	4.88587	3.70556	4.3154	2.32556	2.37735	2.09623	2.96305
TCGA_ER_A3ES	high	0.301354	0.869161	0.496207	0.133169	0	0.180403	1.22231	1.60568	0.136585	0.116764
TCGA_EE_A3JI	low	3.17254	3.86592	3.90864	1.44927	1.99798	1.96525	2.15416	1.98597	2.28045	0.541614
TCGA_EE_A2GU	low	6.36412	4.40881	5.62145	5.0333	3.83836	4.71278	3.56435	3.39786	2.52777	2.26843
TCGA_FS_A4F9	high	1.72775	2.78339	2.07317	0.899794	4.21262	0.545178	0.675545	0.64607	1.0404	5.77677
TCGA_FS_A4FB	high	0.641916	2.58986	1.38869	0.196355	0.0406821	2.27968	0.308244	0.538737	0.238298	0.1396
TCGA_EB_A5VV	low	4.3474	6.69929	4.75293	5.11874	5.06683	5.34132	3.768	3.37224	3.19234	5.19193
TCGA_FS_A1ZU	high	0.836894	3.92736	3.22595	0.335598	0.132511	0.0943712	0.537246	1.03168	2.16816	0.0799754
TCGA_FS_A1ZA	high	4.03909	4.26838	4.12143	3.23548	2.16983	2.24531	2.57882	2.71964	1.9851	1.08828
TCGA_ER_A2ND	high	2.80339	3.52873	2.64729	1.72299	2.1865	0.635894	1.12082	1.56881	0.774587	0.235605
TCGA_EB_A4IQ	high	0.83212	4.0135	1.43136	0.546265	0.614097	0.376624	1.77345	0.968791	0.187768	0.675997
TCGA_3N_A9WB	high	0.568421	1.5757	1.26153	0.160017	2.82022	0.0848807	1.38769	0.295841	0.0843364	0.140386
TCGA_EE_A2A5	high	1.3097	3.90589	3.83155	0.988776	0.503043	0.640436	1.45339	1.65837	1.70788	0.438825
TCGA_ER_A19F	low	2.46469	4.17767	3.51744	2.22546	1.16247	1.62443	1.27923	1.98987	1.3409	0.596172
TCGA_RP_A690	high	0.605115	4.30247	3.46545	1.04033	1.80385	0.638769	1.22132	0.976804	0.346078	0.132116
TCGA_BF_A5EP	high	0.931002	3.37334	1.98656	0.396159	2.35313	0.460271	1.13901	0.993276	0.305562	0.159371
TCGA_D3_A3C7	low	4.94332	6.6001	5.32904	3.85493	6.26202	2.32703	1.47591	2.55829	2.34656	0.891652
TCGA_BF_AAP4	low	5.75405	4.11754	4.89771	4.73586	3.90784	3.53439	3.06681	2.22962	1.60881	1.0092
TCGA_EE_A2GS	low	3.99735	4.32225	3.65173	2.15257	1.90258	1.85431	2.22793	2.03157	1.72762	0.825704
TCGA_D3_A3MR	low	5.6174	4.55624	4.56826	4.22936	3.57835	3.68875	2.90006	2.3846	1.36424	1.63311
TCGA_BF_A3DJ	low	2.5962	4.10199	4.35266	1.82261	1.53585	1.52336	2.94918	2.76054	2.27298	0.482745
TCGA_D3_A3CF	low	3.71786	5.07709	4.98813	3.92071	3.22503	3.56251	2.48016	2.93702	2.35166	2.42086
TCGA_EB_A3XD	high	2.72944	5.8725	3.74067	2.42231	1.89871	2.83915	2.10162	2.70686	1.54503	0.693498
TCGA_DA_A1I0	high	3.22769	5.06299	3.80637	2.84918	1.72037	2.78887	0.736042	0.953824	1.9907	0.847596
TCGA_D3_A8GD	low	6.90585	5.89697	6.15966	5.74539	5.87473	5.3803	3.74587	4.16989	3.2598	3.88518
TCGA_D9_A4Z3	high	1.8922	2.59772	3.00784	1.64911	0.835924	1.37323	0.773068	1.48336	1.53172	0.301822
TCGA_BF_AAP2	low	2.97684	3.78242	2.92433	2.67093	2.04068	2.3272	2.10869	1.26592	0.655993	0.914029
TCGA_EE_A2GD	high	1.90138	5.33543	4.59522	1.46691	1.85874	1.16253	2.73064	2.71618	1.72456	0.525267
TCGA_EE_A29D	high	1.65549	2.65666	3.05353	0.449957	2.81338	0.351176	1.63306	0.790522	1.21089	0.180021
TCGA_GN_A8LK	high	0.72369	1.86243	0.695816	0.665757	1.93289	0.218347	0.583904	0.25411	0.228973	0.1125
TCGA_EB_A44P	low	3.71892	2.41403	2.78287	2.63408	1.97926	2.02853	3.61127	1.9193	0.512277	0.311852
TCGA_FS_A1ZF	high	2.2032	3.32256	2.33568	1.43504	0.59474	0.953749	1.2854	1.26778	0.594644	0.203138
TCGA_FS_A4F8	low	3.67896	6.47659	4.02684	3.35918	4.50143	3.73951	2.35363	2.79198	2.2555	3.07963
TCGA_D3_A51H	low	4.78775	5.85526	4.7417	5.53215	4.97549	4.94123	2.59003	3.11335	1.9578	5.28782
TCGA_YG_AA3P	high	1.68401	2.20833	2.22611	0.891341	0.580145	0.750435	0.74373	0.903964	0.968865	0.37128
TCGA_BF_A1PX	low	5.66019	5.41215	4.2617	4.56101	2.46412	3.46776	3.35249	2.40528	2.22018	0.925999
TCGA_EB_A57M	high	2.17552	4.79794	3.10821	1.58183	1.3888	1.09579	0.800248	1.9164	1.3989	0.158078
TCGA_EE_A2GM	low	3.06874	2.84521	2.75979	2.29707	2.19008	1.3978	1.55954	1.04425	1.1662	0.299714
TCGA_GN_A266	low	5.00306	5.63453	5.97165	3.38038	3.35786	3.42522	4.38467	5.92739	3.54646	1.77758
TCGA_FS_A4F5	high	1.40103	2.97139	2.73626	0.593402	1.01578	0.736042	1.46785	1.02212	0.724912	0.28889
TCGA_EE_A3AE	low	4.66067	5.52525	4.47831	4.54496	2.62709	2.92947	3.52116	3.52366	2.33765	1.61396
TCGA_BF_A5EQ	high	3.36861	4.13648	3.36891	3.25784	2.11859	2.57821	2.04502	1.79452	1.49293	1.2561
TCGA_FR_A69P	high	1.47731	3.9151	3.1408	1.13323	1.43968	0.865365	1.01628	1.34693	1.33994	0.402613
TCGA_W3_A828	high	2.67433	4.90926	3.84475	1.14209	3.29691	1.24202	1.87283	2.52544	2.15416	0.35095
TCGA_HR_A2OG	low	2.69147	4.94194	4.05481	2.07324	3.19188	2.08763	2.8148	3.0509	1.77716	1.15361
TCGA_EB_A3XB	low	2.79616	3.12847	3.37779	2.11327	1.94696	1.85917	3.04501	1.89251	1.11417	0.608147
TCGA_W3_A825	high	5.93743	5.31858	4.96226	4.54383	3.61869	3.77066	2.11066	2.64032	2.62903	1.19969
TCGA_EE_A3JA	low	2.61278	2.95101	4.89744	1.63096	2.41643	2.95712	2.54533	2.99376	1.7956	1.64187
TCGA_BF_AAOX	high	1.05949	2.4734	0.847997	0.903578	0.590339	0.774418	1.43055	0.558464	0.0469799	0.153676
TCGA_EB_A44R	low	5.27182	4.69915	4.27775	5.53569	2.52599	3.27372	1.78522	2.18596	1.85136	1.3927
TCGA_WE_A8ZY	high	2.0811	2.93672	3.17143	1.43504	2.66517	0.962956	2.4064	2.21192	1.07929	0.517931
TCGA_ER_A19B	high	1.73699	5.59043	4.58034	0.544782	5.76679	1.4282	2.26376	0.682573	1.28718	0.15017
TCGA_WE_A8ZX	low	5.24422	4.48242	4.64776	4.55149	3.35987	3.37618	2.37832	2.22626	1.88092	1.19856
TCGA_XV_AAZW	high	1.26981	3.42728	1.82546	0.722029	0.427284	0.291132	1.00612	0.641546	0.256286	0.210638
TCGA_EE_A3AC	low	4.85195	4.07799	5.19348	4.06957	3.34718	3.34291	3.15598	3.25503	2.30267	1.89204
TCGA_D3_A8GB	high	4.6731	4.31271	4.19029	4.46177	3.4844	3.5806	1.73834	2.07881	0.89507	1.46728
TCGA_EE_A29Q	high	0.706111	5.26181	2.2519	0.484705	1.86944	0.872474	2.23674	0.866552	0.683382	0.519743
TCGA_EB_A5UM	high	3.86128	3.24794	3.22192	3.65471	2.94643	2.93537	1.61683	1.00346	0.805292	1.43781
TCGA_ER_A2NB	high	4.0505	4.99164	3.03118	3.28518	1.33033	1.23695	0.882995	0.990011	0.397584	0.135929
TCGA_GN_A26D	high	1.4812	2.73188	3.0268	1.27483	1.49237	1.26093	0.880646	1.2492	1.15251	0.694657
TCGA_D3_A8GK	high	0.818769	2.65737	1.36014	0.503349	1.43531	0.193709	0.475811	0.443607	0.477988	0.028852
TCGA_EE_A2MD	high	3.04049	4.18233	3.54521	2.81482	3.39331	2.29643	1.86084	1.91896	1.60017	1.03598
TCGA_FS_A1ZH	low	5.25082	5.61485	5.43496	4.07721	4.43549	3.416	2.70055	3.28654	3.19372	1.68536
TCGA_FR_A8YD	high	1.62012	3.76463	2.27068	0.986229	0.501516	0.578118	1.03963	1.03675	1.17114	0.206643
TCGA_Z2_AA3V	high	6.67539	5.67641	4.71068	5.38985	3.66364	3.12406	2.10615	1.6717	4.23081	0.511772
TCGA_ER_A42H	high	1.08529	3.46373	3.13263	0.177344	0.769687	0.612683	1.02489	1.70288	1.69982	0.0538064
TCGA_D3_A8GI	high	1.31817	3.88059	2.82202	0.841168	5.80904	0.226878	0.515309	0.596267	1.55061	0.0806577
TCGA_EE_A20I	low	3.74604	3.65053	3.79292	2.67791	1.91774	2.20923	2.8054	2.15869	1.40321	0.679424
TCGA_XV_A9VZ	high	1.75514	4.27615	1.49708	1.13172	0.595217	0.668573	0.784169	1.822	0.156526	0.17594
TCGA_D3_A2JC	low	3.98293	5.58931	5.02494	3.30718	3.24709	3.52045	3.26539	2.98282	2.08437	1.17025
TCGA_EB_A41A	high	1.96085	2.13832	1.64519	0.757706	1.22441	0.837297	0.762391	1.41408	0.149389	0.194213
TCGA_EE_A29W	high	1.07546	4.25891	3.12004	0.807849	4.18975	0.996389	0.385707	1.40626	1.23168	0.258459
TCGA_WE_A8K5	high	3.34638	3.72819	3.68045	2.96641	2.26427	2.28294	2.22058	2.02372	1.20658	0.755828
TCGA_D3_A3BZ	low	4.80202	5.85685	5.26308	3.57519	3.71206	3.46043	2.94664	3.19024	2.54538	1.41489
TCGA_D9_A4Z2	high	0.973281	4.60167	2.21673	0.517931	0.842858	0.763072	1.24981	1.35592	1.44255	0.1503
TCGA_EE_A20F	low	4.97879	4.10936	4.58096	3.87436	3.06307	2.95957	2.33882	2.92748	1.98382	1.18504
TCGA_XV_A9W5	high	3.66485	4.28368	3.32472	2.43453	2.01321	1.71163	1.75809	1.83819	0.507516	0.230818
TCGA_EE_A29G	high	2.22586	5.11757	3.58217	2.21384	1.59359	1.97922	1.73678	2.46579	1.80331	0.837217
TCGA_D9_A148	high	2.98528	4.22382	3.26443	2.49695	2.84691	1.7264	3.53682	2.05155	1.26027	0.585059
TCGA_D3_A2JE	high	1.36328	2.15283	1.76859	0.705845	0.694568	0.620586	0.307312	0.679424	0.459432	0.231064
TCGA_ER_A19S	low	7.29726	5.46397	5.89909	6.2368	4.37933	5.23925	4.19107	4.33666	3.07938	2.74351
TCGA_EB_A431	low	1.6575	2.74829	2.07871	0.713872	3.46433	0.967242	2.23857	1.07313	0.392757	0.319502
TCGA_EB_A6QY	high	1.34216	3.27054	2.27596	1.154	3.56463	0.896853	1.50365	0.887369	0.703809	0.371838
TCGA_W3_AA1V	high	3.40825	4.44555	4.61177	2.13307	2.38858	2.04893	6.0831	6.60436	2.83562	0.370722
TCGA_BF_AAP1	high	2.11	3.46955	2.03664	0.648097	1.82391	0.613437	0.594549	0.932137	0.89476	0.190552
TCGA_EE_A20B	low	3.70747	6.84683	4.44336	2.77564	6.11763	2.23511	1.74101	2.48427	2.38317	0.895303
TCGA_D9_A6E9	low	8.77003	5.52229	6.57898	7.1452	4.29312	5.08736	4.75289	3.64334	3.92566	1.77871
TCGA_WE_AAA4	low	7.91465	5.83969	5.90561	5.57856	3.26623	4.302	3.67764	3.44681	3.33434	0.984042
TCGA_EE_A3AH	high	0.748375	2.76118	2.15381	0.411752	0.517528	0.521955	1.37945	1.49948	1.36849	0.485118
TCGA_GF_A769	high	1.60734	4.98828	2.80163	0.595886	2.01235	0.424707	1.95286	0.835035	1.59077	0.157691
TCGA_FW_A5DY	high	3.44232	5.34684	3.57501	3.60828	3.14503	3.49548	1.91575	2.39966	1.89348	4.04232
TCGA_D9_A6EG	high	0.32987	2.63243	2.40656	0.169668	6.22293	0.118891	0.642101	0.559247	1.05381	0.213503
TCGA_GN_A4U5	low	5.62789	5.47746	5.09647	4.9912	4.1084	4.00474	4.37354	2.919	1.14411	1.69955
TCGA_DA_A95Y	high	1.10427	2.29387	2.3162	0.333424	3.05393	0.225398	0.821302	0.320889	0.750263	0.0936954
TCGA_EB_A85I	high	4.92538	3.60554	3.7481	4.074	2.84338	3.21134	2.52865	1.36368	0.453017	0.863225
TCGA_WE_A8K4	low	6.2822	3.669	5.16893	5.87545	3.86785	4.5571	3.90549	2.49833	1.88518	2.28208
TCGA_FW_A3R5	high	2.32467	3.82005	3.90971	2.1429	3.1765	2.19648	1.96395	2.44893	1.69091	1.41646
TCGA_ER_A19L	low	0.997545	5.28938	2.65659	0.7876	0.746485	0.641084	1.36233	1.41668	1.046	0.239765
TCGA_BF_A1PU	high	0.313594	3.40557	1.2447	0.203765	0.319271	0.120352	0.660472	0.40806	0.17594	0.0210533
TCGA_FS_A1YX	low	2.15092	3.97396	3.95846	0.988848	0.836167	1.01221	1.30615	1.5726	2.244	0.23008
TCGA_D3_A1QA	low	3.33932	3.02372	3.61586	2.2756	2.94066	2.20201	4.22889	4.64451	2.01835	0.574053
TCGA_EE_A2M5	high	4.89623	4.38127	4.34677	3.12476	1.94894	2.92258	6.55004	6.22631	1.99881	0.577634
TCGA_D3_A1Q7	low	7.32798	5.83966	6.06932	5.6692	4.68003	4.71195	4.7228	4.55675	3.64114	2.65801
TCGA_DA_A3F2	high	6.43997	6.32412	6.17539	5.41133	2.28164	2.83372	1.1908	1.82969	4.33019	0.649386
TCGA_EE_A2MT	high	2.56533	2.07919	2.393	1.51652	1.19112	1.32585	1.6617	0.896698	0.80149	0.111165
TCGA_ER_A2NH	low	7.76623	6.02548	6.54709	6.46472	5.90753	5.46854	4.44085	4.2921	4.00087	3.07598
TCGA_FS_A1YY	high	0.645333	3.1772	3.14687	0.325271	0.245982	0.110764	0.827575	0.876566	1.14503	0.287354
TCGA_ER_A19J	high	2.26772	5.9798	4.29394	1.81623	0.815821	1.48702	2.32011	2.57577	2.29737	0.154065
TCGA_EE_A2MP	low	4.72563	4.45367	4.78962	3.317	2.71877	2.94165	2.62099	3.06178	2.42011	0.585251
TCGA_XV_A9W2	high	1.22589	4.05823	1.73509	0.449852	2.26138	0.608715	1.91476	1.49267	0.285816	0.145743
TCGA_D3_A8GP	high	2.57367	2.28889	1.9102	1.89875	0.930321	1.14555	1.02396	0.783331	0.346078	0.298776
TCGA_D9_A6EC	low	2.41533	4.24449	3.48615	1.18656	2.03379	0.621243	2.57698	3.01248	1.36278	0.103128
TCGA_EB_A5UN	low	2.19061	3.72956	2.37748	1.92505	1.81262	1.27602	3.67977	1.90947	0.46048	0.207643
TCGA_D3_A51K	high	5.84438	3.94926	2.89369	4.00526	1.45386	1.80966	1.41208	1.24945	1.10695	0.426211
TCGA_EE_A2GL	high	3.95204	5.70715	3.84559	3.61363	2.96527	4.10869	3.03701	2.61652	2.44935	3.67317
TCGA_GN_A265	low	4.16373	5.9762	5.41765	3.36467	4.34512	3.92186	3.26884	4.1654	3.12171	2.01189
TCGA_D9_A4Z5	low	2.1753	4.83344	4.06032	0.792606	0.386811	0.253505	1.54701	2.29516	2.7029	0.139208
TCGA_ER_A195	low	5.56831	6.25074	5.26776	4.46566	7.58852	3.78107	3.26212	3.81323	3.67466	1.9753
TCGA_EB_A4IS	low	5.29946	5.12451	4.59566	5.19935	3.013	3.73589	3.46779	3.43194	1.56608	2.43518
TCGA_D3_A8GC	high	2.58717	3.39705	4.49278	1.80851	3.14315	1.91246	3.10939	2.30932	2.19156	0.917241
TCGA_WE_A8K1	low	5.37769	4.31785	4.73755	4.90115	4.11765	3.9301	3.29081	2.83732	1.50838	1.73044
TCGA_FS_A1ZM	low	6.28823	4.6122	5.47527	4.98851	3.35396	3.2475	2.79131	3.22058	3.03554	1.26855
TCGA_FS_A1ZD	high	1.80058	4.28478	4.34447	0.16092	0.300182	0.148479	1.03161	1.81159	1.98109	0.214125
TCGA_EE_A29C	high	1.42578	4.48645	3.66902	0.97497	3.06257	0.860764	1.39813	1.47441	2.00662	0.327687
TCGA_GN_A267	high	3.44038	3.00865	3.2212	2.51639	1.68041	2.46454	1.6403	1.01956	0.708496	0.736735
TCGA_DA_A95X	low	2.65785	4.03679	4.4477	2.39572	2.47069	1.7243	3.70312	3.39819	2.33047	0.742696
TCGA_EE_A17X	high	2.15351	2.76203	3.10924	0.68921	5.31121	0.568616	1.41533	0.823749	1.43419	0.122871
TCGA_EE_A29E	high	0.749234	4.0337	1.34534	0.280481	6.81761	0.277866	0.167615	1.65567	0.411752	0.108223
TCGA_BF_A3DM	low	1.60393	3.6589	2.91179	0.442864	0.534161	1.15432	1.67098	1.51546	1.65343	0.130799
TCGA_D3_A8GN	low	4.72738	4.77546	3.79487	3.63725	2.94739	3.01666	2.70186	2.7164	1.40376	0.817296
TCGA_ER_A19M	low	4.89006	4.5579	5.34745	4.93217	4.32978	3.85639	6.61057	6.15263	2.8256	1.96824
TCGA_GN_A26C	low	6.52898	6.00227	5.85918	5.09538	2.83261	4.09161	6.43245	6.84956	3.56512	1.92444
TCGA_EE_A2MJ	low	6.22559	4.96328	5.40472	5.13857	4.29588	4.82795	3.57365	3.38245	2.70836	3.10861
TCGA_ER_A196	high	0.387914	5.11107	1.87503	0.1133	1.8965	0.657091	2.39961	2.26475	0.417488	0.033793
TCGA_EE_A2GE	low	5.8231	5.83782	5.52832	5.16143	3.39794	3.9855	3.42032	4.00229	3.46986	2.01664
TCGA_QB_A6FS	high	5.64788	4.75937	4.58669	4.51989	2.29924	2.7717	1.43568	1.71554	2.19418	0.469573
TCGA_DA_A1I7	low	3.34507	4.49603	3.99902	2.15982	5.7097	1.60748	1.22342	1.97071	1.58794	0.364909
TCGA_ER_A197	low	5.815	5.74586	5.40296	4.57151	3.29337	3.37491	2.43029	3.43087	3.56432	1.13553
TCGA_EE_A181	low	5.27814	4.70269	4.95282	4.8801	3.04186	3.70166	3.58331	3.90851	2.51101	2.1564
TCGA_FW_A3I3	high	2.07776	3.83347	2.32542	1.19686	1.33623	1.11257	1.69973	1.06461	0.674099	0.146916
TCGA_GF_A4EO	low	5.59772	5.16089	5.15711	4.51683	3.94097	4.34188	3.6711	3.67762	2.66084	2.21434
TCGA_EB_A4P0	high	3.17311	3.50285	2.774	2.41738	0.994	1.30591	1.75121	1.99418	0.138159	0.503043
TCGA_YG_AA3N	high	5.94402	4.5589	4.24906	5.44085	2.811	3.66239	2.10551	2.59311	1.66744	1.073
TCGA_D3_A8GM	low	4.18435	3.89634	4.76898	3.26406	5.93441	3.14313	3.66669	3.10735	2.01621	1.34142
TCGA_D3_A5GN	low	4.00976	4.08129	4.39254	3.00764	3.95936	2.92429	2.87228	2.38482	1.78706	1.05762
TCGA_EE_A29R	high	1.30387	3.33784	2.28753	0.873813	2.31947	0.846714	1.06543	0.823016	0.687419	0.409364
TCGA_QB_AA9O	high	5.3533	4.03201	4.30143	4.35425	3.94074	3.0816	2.19871	2.49646	1.03259	0.74528
TCGA_D9_A3Z1	high	5.23733	4.30639	5.08326	4.14395	3.21097	3.6349	2.66177	2.96993	2.52339	1.79019
TCGA_EE_A29S	high	3.83685	4.52941	4.64338	3.10745	2.61186	3.19461	1.8341	2.29037	1.92326	1.09376
TCGA_DA_A1IB	low	5.36771	5.31877	5.18352	4.78942	4.5983	4.78089	3.55249	3.87188	2.73407	3.39935
TCGA_EE_A3J4	low	2.63636	3.14432	3.62093	1.5148	1.48336	1.36597	2.42616	1.71594	1.51395	0.458487
TCGA_D3_A1Q3	high	4.36415	4.39907	4.24052	4.19118	2.7563	3.90536	3.0942	2.7632	2.0131	2.6017
TCGA_GF_A6C9	high	5.17853	6.04291	5.66269	4.01281	3.28176	3.14377	2.28644	3.85277	2.45623	2.47327
TCGA_EE_A3JH	low	5.72583	5.56027	5.54734	5.11484	3.88146	4.40483	3.69832	3.40192	3.84637	2.17453
TCGA_ER_A193	low	5.02012	4.03229	4.92481	4.30029	2.94266	3.25311	4.6683	4.52428	2.3781	1.48723
TCGA_D3_A8GQ	high	2.6308	3.53189	3.08422	1.46053	2.14851	1.57459	1.03942	1.55272	1.5569	0.315334
TCGA_BF_A3DL	high	1.42798	3.05799	1.87562	0.451013	4.75728	0.205893	0.784504	0.469052	0.694925	0
TCGA_D3_A5GS	low	4.52063	3.92834	4.86204	4.20634	2.46519	2.5067	2.54023	2.52384	1.78199	1.02871
TCGA_D3_A3MO	high	0.896621	3.21123	2.81383	0.72927	1.30153	0.207143	0.279412	0.360196	1.61169	0.273098
TCGA_EB_A51B	high	2.86558	2.54431	2.14867	1.79963	1.62049	1.43141	2.22178	2.01874	0.346758	0.386811
TCGA_D9_A1X3	high	0.525067	2.32178	1.88585	0.0816123	0.702037	0.0285692	0.918844	1.08963	0.503654	0.0713508
TCGA_EB_A3XE	high	2.91921	4.26612	2.9226	2.33299	1.19598	2.06523	0.779386	1.02666	0.234379	0.302056
TCGA_EB_A5FP	high	0.556209	1.82493	1.20677	0.211884	4.71382	0.24062	1.45927	0.898324	0.250234	0.106482
TCGA_EB_A3XC	high	2.18526	3.8579	3.269	1.75116	2.83598	1.33554	0.988557	1.62204	1.28647	0.593688
TCGA_FR_A7UA	low	7.8167	5.74021	6.73888	6.80324	5.28501	6.14972	5.11655	5.11375	3.6558	3.67327
TCGA_YG_AA3O	high	2.43946	2.86894	3.37341	2.46871	6.21427	1.83766	1.39336	1.90616	1.45223	0.637286
TCGA_EE_A2GR	high	0.35061	2.03566	1.30206	0.214622	0.160791	0.238053	0.193204	0.602742	0.269991	0.217851
TCGA_LH_A9QB	high	0.635615	4.96549	1.94729	0.389897	3.14486	0.686075	1.99201	0.593019	0.594166	0.239154
TCGA_EB_A550	high	2.76979	5.47938	1.9299	1.57381	1.65805	0.71079	2.78157	1.26436	0.443607	0.267476
TCGA_WE_A8ZO	low	4.51304	5.97018	4.90785	4.06674	2.92932	2.9573	2.85655	3.17851	3.01865	1.84627
TCGA_D3_A2JN	high	4.22001	4.31301	3.57859	3.00815	2.42309	3.05242	1.40833	2.0562	0.85591	0.809826
TCGA_ER_A194	high	4.13694	3.67047	2.98123	3.66584	0.801986	1.77871	0.936289	1.15348	0.712816	0.293959
TCGA_EE_A20C	high	0.401303	3.30545	2.69118	0.272262	1.57754	0.170053	2.1133	0.317651	1.17159	0.183582
TCGA_D3_A2J9	low	7.78844	5.84086	6.04724	6.65796	4.49701	6.15918	4.11281	3.9607	3.65861	3.81076
TCGA_RP_A694	low	3.94352	4.75002	4.6559	3.47772	2.50139	2.14052	1.59402	2.31449	1.77032	0.871134
TCGA_EE_A2GC	low	5.34832	4.85906	5.55365	4.09014	6.63229	4.02624	3.16467	4.04155	2.06681	1.30854
TCGA_FR_A7U8	high	1.23548	3.23039	2.99418	0.747258	0.509138	0.836571	0.732313	0.824809	1.1804	0.0999011
TCGA_YD_A89C	high	1.50462	2.58664	1.76969	0.873656	0.968939	0.795019	0.175429	0.613909	0.80149	0.249991
TCGA_EE_A185	high	0.188654	1.94486	0.845992	0.1129	0.602837	0.0977456	0.501516	0.357158	0.322851	0
TCGA_FR_A44A	low	6.78108	5.5874	6.1418	5.64593	3.5204	4.84572	4.73883	4.8075	3.70061	2.22669
TCGA_D3_A51F	low	7.92937	6.46192	7.31735	7.33453	5.26105	6.04684	4.36269	4.53802	3.87683	3.34392
TCGA_EE_A3J8	high	1.33153	1.7219	2.56489	0	0.849759	0.29337	0.702037	0.709555	0.505993	0.362105
TCGA_D3_A3C8	low	8.60522	5.90889	7.47589	6.91972	5.20159	5.86762	5.61336	5.50452	2.54932	2.82034
TCGA_EE_A2A0	low	2.63276	4.19527	5.02529	0.635151	2.77286	3.23286	2.65496	3.67618	2.57923	2.17489
TCGA_FR_A7U9	high	4.27902	4.94546	5.3289	3.31211	3.72343	2.91577	4.32487	5.44543	2.30302	1.26478
TCGA_D3_A5GT	high	0.509848	0.853597	0.810237	0.0687396	0.110497	0.0938306	0.115033	0.224287	0.24306	0.0270125
TCGA_EE_A2A1	low	4.58291	5.77629	5.30236	4.73091	2.97418	3.86028	3.70908	3.61829	3.05008	2.20433
TCGA_EE_A2MU	low	5.76952	5.14971	5.80891	4.11137	5.40589	3.50358	4.16732	4.03353	3.18675	1.25948
TCGA_FS_A1ZJ	low	4.10024	3.25128	3.36618	2.62352	1.55753	1.90743	1.34113	2.02439	3.02239	0.560128
TCGA_EE_A29L	high	0.622837	1.1032	0.859811	0.435842	0.824564	0.165301	0.782576	0.159629	0.0781999	0.15095
TCGA_FR_A8YE	low	3.18606	6.57528	5.26457	3.70818	4.74697	4.31332	3.13379	2.9362	2.77022	3.64536
TCGA_EB_A4OY	high	3.32944	2.41349	1.69644	2.44419	0.233765	0.946282	0.426104	0.231555	0.243913	0.0732718
TCGA_D3_A2JA	low	5.58334	5.00126	5.91639	3.04002	2.94931	2.698	4.02027	4.2368	2.8426	1.07176
TCGA_FW_A3TU	high	2.86241	3.92118	2.74653	1.9077	4.90178	0.823586	1.03816	1.37239	1.59345	0.245617
TCGA_BF_AAOU	high	2.05544	3.85675	2.66864	1.31609	1.90327	0.863066	2.28768	1.73179	0.515309	0.278104
TCGA_FW_A5DX	low	1.07724	5.76709	2.10695	0.482125	1.69737	0.686613	1.1776	1.27566	1.11043	0.19131
TCGA_EB_A41B	high	3.26159	2.58852	2.82552	2.93312	1.43376	1.66426	2.18444	0.703012	0.517225	0.541515
TCGA_EB_A44Q	low	5.56629	4.57878	4.80008	5.59275	3.43421	3.98295	3.35655	3.54026	2.37501	2.33016
TCGA_Z2_A8RT	low	3.90165	5.34992	4.11005	3.30926	3.17125	3.30394	3.23125	2.34156	1.80764	1.72722
TCGA_WE_AAA3	high	5.22498	4.54434	4.81018	3.78168	2.58465	2.19893	2.95855	2.39917	2.44408	0.806613
TCGA_GN_A26A	low	4.18161	5.32071	5.49225	2.76829	4.1675	2.22311	2.83607	3.83406	2.82597	0.357721
TCGA_EB_A553	high	1.60089	1.74308	1.68823	0.633757	1.50482	0.503654	0.375957	0.377401	0.255924	0.0391384
TCGA_EE_A2GK	low	3.77558	6.93361	4.7436	5.52912	4.95445	5.11048	2.89699	3.27105	3.22134	4.83431
TCGA_FR_A3R1	low	4.2297	3.13353	4.13397	2.56438	5.05821	2.69755	4.58296	1.91976	0.945158	0.815739
TCGA_DA_A1IC	high	1.72696	3.29011	2.27232	1.51591	1.67785	1.51889	2.62583	1.36513	0.641084	0.569783
TCGA_EE_A3JB	low	2.65175	4.86987	4.91943	1.96831	3.58767	2.33665	2.67218	3.24117	2.404	0.810566
TCGA_D9_A4Z6	high	1.88237	3.32425	2.2606	1.41365	3.47712	0.694033	1.45885	0.860685	0.768333	0.179766
TCGA_EE_A184	low	4.27644	3.67973	3.87768	3.82619	2.38286	2.54241	2.47933	2.04796	2.01735	0.915942
TCGA_ER_A19K	high	2.31464	3.30037	3.06664	1.78039	3.17621	1.56643	2.62987	2.15228	1.08154	0.39605
TCGA_EE_A2GO	low	1.74463	4.78202	2.64577	0.778965	8.33621	0.266037	1.76065	1.30865	0.959622	0.0213376
TCGA_D3_A1Q9	low	4.48791	3.53818	3.9983	2.92773	1.23799	2.46438	3.29104	2.0663	1.31863	0.705668
TCGA_BF_AAP0	low	5.64991	5.39827	5.23523	5.24955	3.71705	4.54363	3.44186	3.02949	2.43611	2.54651
TCGA_D3_A51J	low	6.37754	4.9883	5.46773	5.57841	4.30587	4.89324	3.57339	3.33818	2.83552	2.75181
TCGA_D3_A2JL	low	5.28256	3.95377	3.74287	5.29516	2.66623	3.65846	2.52002	1.99505	0.913263	1.67016
TCGA_EE_A2GT	high	3.23252	5.67496	4.44404	4.22621	2.24738	3.57066	1.64962	2.4261	2.85609	2.48135
TCGA_EE_A3J3	low	3.30352	4.42709	4.26568	2.24004	1.77943	2.16395	1.55616	2.11932	1.51511	1.12882
TCGA_YD_A9TA	low	4.14193	4.66946	4.76062	3.12956	3.08328	2.52218	3.06426	3.58584	2.42148	1.79323
TCGA_EE_A29X	high	4.3336	4.42656	4.69405	3.42814	3.66854	2.14737	3.27429	1.98914	2.89867	0.718
TCGA_EE_A2MG	low	3.54221	6.21904	4.80466	4.48775	3.53233	4.48305	3.04161	3.29666	2.48643	4.08071
TCGA_EE_A17Z	high	0.754631	2.45812	1.52832	0.404903	0.230449	0.27858	0.460376	1.36435	1.1036	0.0244615
TCGA_WE_A8ZR	high	2.05683	3.10511	2.85276	2.06271	1.82477	1.79452	1.53844	1.2372	1.1157	1.16105
TCGA_GN_A4U4	high	1.66753	4.35945	1.57701	1.22669	1.79643	1.39534	1.19447	0.490057	0.653702	0.809497
TCGA_D3_A3CB	low	6.15986	5.79585	5.45875	4.5289	4.33251	5.32955	6.81659	4.0381	4.2944	3.59741
TCGA_EE_A2MS	low	3.95388	4.4227	3.93826	3.44652	1.74889	2.48872	1.80933	2.44193	2.1791	1.12281
TCGA_W3_A824	low	6.02933	4.13385	4.77444	4.61771	3.07125	3.6313	4.25751	3.08687	1.73747	1.03147
TCGA_EB_A42Y	low	2.41332	3.28919	3.26401	1.70385	0.617298	1.08188	1.88842	2.06257	1.5966	0.239887
TCGA_GN_A4U9	high	2.74362	3.59815	3.28462	1.9396	1.75587	1.51536	1.42862	1.37351	2.19453	0.905582
TCGA_BF_A5ES	high	2.05797	3.89557	3.64121	1.77129	1.55655	1.52862	1.75369	2.43582	0.670478	0.347099
TCGA_EB_A4XL	high	3.31468	5.78853	2.96031	2.61231	2.52642	2.42178	2.53951	1.96133	0.63951	1.01528
TCGA_OD_A75X	low	2.28904	3.58564	3.39958	1.87814	1.29314	1.04845	2.54575	1.36233	1.90562	0.280956
TCGA_ER_A19W	low	6.70889	5.63106	6.22904	5.70644	5.00751	5.4986	4.86682	4.39608	3.8676	3.49903
TCGA_DA_A1HW	low	5.74228	5.13044	5.03171	4.69875	3.88753	4.64173	3.53973	3.44708	2.96342	2.07577
TCGA_D3_A8GE	low	2.9715	5.97762	4.32846	3.27153	7.34139	3.19722	2.47547	2.83244	1.66457	1.28493
TCGA_EE_A2GI	low	5.88612	4.33109	4.98713	5.0749	2.94748	3.76181	2.75437	2.56157	2.00867	1.5478
TCGA_D3_A1Q4	high	1.68621	5.1617	3.52538	1.22928	1.32981	1.42444	1.18295	2.39701	1.10104	0.763751
TCGA_EE_A2MH	low	4.78172	5.98109	3.9379	3.21009	2.97614	3.41082	1.7427	1.80591	1.60089	2.15927
TCGA_BF_AAP8	high	3.43952	2.91955	2.26861	1.87011	1.29237	1.33777	1.92486	1.12988	0.53456	0.184852
TCGA_W3_AA21	high	2.70525	1.83163	1.80418	1.8516	1.01621	1.3878	0.667938	0.649202	0.0791562	0.434028
TCGA_3N_A9WC	low	5.9901	4.85908	5.35798	5.53705	4.09691	4.45271	5.08833	4.8235	2.50164	2.14698
TCGA_EE_A2ME	low	5.50846	5.93076	5.98902	5.80744	5.31561	5.52556	4.11576	4.88603	3.22393	4.22178
TCGA_W3_AA1Q	high	2.70137	3.14682	2.91179	2.72076	2.33391	2.54258	2.80867	2.14584	0.62798	0.945608
TCGA_ER_A2NG	low	6.21494	4.8447	6.06829	5.2179	4.64615	4.15575	4.50124	4.70964	3.04296	2.10199
TCGA_FS_A1Z0	low	5.45428	5.39175	5.10387	4.61036	3.28327	3.75813	3.35589	3.78374	2.88049	1.92729
TCGA_DA_A1IA	high	1.26279	2.8305	1.76273	0.89103	2.35205	0.295958	1.60417	0.361993	0.69813	0
TCGA_D3_A2JO	low	6.33318	5.15166	5.84981	4.46373	3.48683	3.91593	4.1272	4.13367	3.15014	1.32395
TCGA_FS_A4F0	low	1.95475	2.66077	1.66476	0.366364	0.098689	0.320542	3.59537	0.997907	0.455123	0.417812
TCGA_FW_A3TV	low	3.17393	3.96647	3.89223	3.01949	1.93783	2.36311	1.84278	2.53232	1.81496	1.94009
TCGA_FS_A1Z4	low	5.40293	5.54559	4.96847	4.2883	4.42704	4.60967	3.00601	3.52509	2.63152	3.60284
TCGA_WE_A8ZN	high	5.05798	3.75428	3.65795	4.15432	2.887	2.30585	1.82493	0.604071	0.916935	0.314639
TCGA_D9_A6EA	low	2.49792	2.88055	2.89648	1.10642	2.50108	0.70726	1.72216	0.878843	0.888071	0.197236
TCGA_EB_A1NK	high	1.97141	4.24372	2.69022	1.56067	0.781318	0.993928	1.22799	1.2652	0.854315	0.209017
TCGA_D3_A1Q1	low	1.47004	4.15915	2.87827	0.616169	0.18574	0.530171	0.9911	0.471864	1.6854	0.155749
TCGA_GF_A2C7	high	0.420725	2.93994	1.91115	0.219711	0.569005	0.265677	1.1133	1.00928	0.311736	0.0951818
TCGA_BF_A1Q0	low	2.99746	4.02784	4.10402	2.08763	1.40746	2.02952	4.93844	3.77243	1.57672	1.17932
TCGA_EE_A3J7	low	3.44869	2.53764	3.15395	2.83998	2.03189	1.7317	1.47649	1.68554	1.31823	0.358171
TCGA_D3_A5GO	low	4.50419	3.50336	3.82877	3.2116	1.99892	2.32173	2.17402	2.37407	1.27423	0.478092
TCGA_FR_A2OS	high	0.588325	3.86804	3.07327	0.382501	0.882056	0.304745	0.879314	2.39944	1.521	0.102322
TCGA_IH_A3EA	high	1.88327	2.25384	3.20275	1.33731	0.924252	0.524064	1.53431	0.690998	1.30024	0.122606
TCGA_EB_A3HV	high	1.41868	4.89537	3.49166	1.23242	2.55959	0.773321	1.11929	0.90912	1.88659	0.15056
TCGA_D3_A2JP	high	4.85341	5.51687	4.37914	3.35382	2.38195	3.10812	1.45223	2.07752	1.93636	1.12955
TCGA_GN_A264	high	0.969086	3.79337	3.85419	0.726831	0.355129	0.556405	1.13231	1.39001	1.8948	0.24123
TCGA_EB_A44O	low	1.74979	2.53079	2.48197	1.27023	7.20547	0.997039	2.74702	1.20571	0.913569	0.356257
TCGA_GN_A4U8	low	5.41574	4.30617	4.75749	3.83535	3.21692	4.03253	3.43132	2.59531	2.17754	2.41762
TCGA_EE_A2MC	low	6.73262	5.75513	6.07257	5.36696	3.70757	4.2715	4.35731	5.53866	3.48008	1.78651
TCGA_D9_A3Z4	low	3.49215	4.87813	4.07235	2.64879	2.58065	2.48995	2.65219	2.3623	2.04879	1.19308
TCGA_D3_A2JG	high	0.991027	2.61304	2.21496	1.01328	1.95006	0.854395	0.756511	0.923948	0.750006	0.330214
TCGA_D3_A51R	high	2.38565	2.5727	1.22663	0.207768	0.541416	0.0749164	0.109829	0.341644	0.966504	0
TCGA_EB_A3Y6	high	2.66667	3.34335	3.3539	2.28827	1.7978	1.63974	2.14052	1.90808	0.467175	0.721766
TCGA_GF_A3OT	high	3.45721	4.15099	4.61259	2.42422	2.82902	2.39028	6.46552	5.40679	2.29622	0.554442
TCGA_FS_A1ZT	low	4.90574	5.15071	4.39819	3.57831	3.75906	3.63856	3.69976	3.2724	2.0941	2.27122
TCGA_FS_A1ZG	high	1.41435	2.71931	2.71262	0.786847	1.29213	0.78266	0.879863	0.918386	1.38051	0.943884
TCGA_DA_A1I1	low	5.11222	5.21625	5.27652	3.8501	3.16061	3.02696	3.77856	3.45868	2.60853	1.46205
TCGA_D3_A2JK	high	0.333882	4.29363	3.01114	0.250719	2.12009	0.0912598	0.368042	0.218595	0.663937	0.15082
TCGA_EB_A97M	low	4.08611	3.11512	3.55841	2.8435	2.401	1.74188	2.03277	1.34085	1.46629	0.414244
TCGA_EE_A183	high	2.65313	6.01449	3.60875	3.44836	2.19248	2.29537	1.89064	1.71682	2.18976	1.73049
TCGA_D9_A149	low	5.18895	3.95589	4.95336	3.52419	2.7416	3.15179	3.25129	3.78667	2.31641	1.6951
TCGA_FS_A1ZR	low	2.75894	4.04769	3.13394	2.01521	1.68145	1.99942	2.50962	2.00137	1.03485	0.74373
TCGA_D3_A2JF	low	4.41177	4.46501	3.71285	3.54705	2.46187	3.07555	3.59231	2.45817	1.4351	1.75937
TCGA_RP_A693	low	4.76594	5.16308	4.66286	3.65847	2.53391	2.69768	2.68356	3.17002	3.055	1.18574
TCGA_FR_A3YN	low	3.61622	4.4083	3.71539	3.64143	2.54481	2.91934	3.3061	2.29637	1.03675	0.952483
TCGA_EE_A20H	high	2.44026	2.75867	2.32726	1.44774	4.72657	1.11843	0.802565	1.26105	1.05707	0.210139
TCGA_FS_A1ZE	high	0.599223	2.8403	1.94553	0.459641	1.10796	0.592062	0.301705	1.16851	0.580242	0.247077
TCGA_EE_A29B	high	2.03221	2.89173	3.76224	1.30935	2.93926	0.823179	1.61037	0.799999	2.06209	1.17511
TCGA_GN_A268	high	1.69737	1.79913	3.06678	1.01792	3.1885	0.695905	1.20226	0.949796	1.34227	0.274053
TCGA_Z2_AA3S	low	3.30511	3.19309	3.08016	2.98244	1.5369	2.6893	1.37807	1.88799	5.63568	1.13205
TCGA_GN_A4U3	low	0.751292	2.45738	2.2875	0.483674	2.31809	0.222186	2.13221	0.690015	0.994869	0.179129
TCGA_BF_A1PZ	low	3.67893	2.8176	2.69319	2.25972	1.383	1.33845	1.65805	1.30889	0.822037	0.308361
TCGA_3N_A9WD	low	3.57091	4.68216	3.37093	2.98899	2.16896	2.91961	2.5454	1.76269	1.12453	1.82118
TCGA_FR_A8YC	high	3.37592	3.92688	3.48786	3.13223	1.98863	1.97394	1.29119	2.80626	1.52291	0.603027
TCGA_D3_A2J7	low	3.93649	6.9833	4.03915	3.02995	2.49641	2.84884	3.79479	2.97157	1.66061	1.33857
TCGA_HR_A2OH	low	8.12449	6.13906	6.5932	6.47182	5.52866	5.65562	5.01187	4.86649	4.06378	3.37796
TCGA_EE_A2MK	low	4.55445	4.78411	5.08606	3.65283	2.18091	3.36121	4.02029	4.23423	2.54841	1.46462
TCGA_EB_A6R0	low	5.99154	3.52408	5.14505	3.94451	2.98056	3.40805	5.20762	4.06646	1.66548	1.24355
TCGA_D3_A5GR	low	3.41677	5.06808	4.42528	2.76003	3.13624	3.43296	2.90739	3.05955	2.0605	2.21213
TCGA_FS_A1ZK	high	0.480679	2.57947	1.92106	0.242816	0.669299	0.159887	1.04928	0.603502	0.543001	0.204266
TCGA_EB_A3XF	low	2.6492	4.41781	4.07288	0.942758	1.21276	0.732399	4.04397	3.23501	1.62775	0.367595
TCGA_EE_A2MN	low	4.71684	4.42856	5.13697	4.51575	2.35977	3.41136	2.63245	2.96593	2.70104	1.69746
TCGA_EE_A2A6	low	5.45346	4.448	4.70967	4.72072	3.89348	4.05533	2.60438	1.92809	1.93746	1.97497
TCGA_ER_A42L	low	5.87941	5.87252	5.63666	4.49757	3.10628	3.91054	3.28517	3.36028	3.68702	1.58688
TCGA_WE_A8K6	low	2.19052	4.91404	2.94174	0.350497	0.67708	0.336855	0.86924	1.19604	1.13218	0.0749164
TCGA_FS_A4F4	high	3.65565	3.74389	3.61432	2.66612	0.909197	1.45491	0.88049	1.38957	1.16736	0.284869
TCGA_D3_A5GU	high	3.583	3.53916	3.82129	3.19271	2.11036	2.32418	1.80141	1.97959	1.30153	0.982072
TCGA_ER_A19D	high	3.85079	5.34823	5.13032	3.34275	2.4799	2.99722	1.97658	3.28488	3.55837	1.67978
TCGA_DA_A95Z	high	1.78027	3.28775	2.70361	1.40561	0.666938	0.854953	1.77556	1.32671	1.42916	0.301354
TCGA_EB_A5UL	low	5.13604	3.52836	3.9254	4.41822	4.10755	3.32447	2.14454	1.74239	1.11623	1.37562
TCGA_D3_A3MU	high	2.7376	3.85296	3.82936	2.26069	1.53351	1.5878	2.19027	1.71092	1.3041	0.49416
TCGA_GF_A6C8	low	5.37165	4.71337	4.40358	3.14942	2.45518	2.60253	2.77387	2.14512	2.15494	1.05304
TCGA_WE_AA9Y	high	1.43371	4.78487	3.55794	1.94606	4.21262	1.6774	0.927214	1.56672	1.75309	1.11377
TCGA_EE_A2MI	low	4.20692	5.74547	5.91321	3.78656	2.1476	3.0274	3.48683	4.46003	3.43027	1.60905
TCGA_D3_A3CC	high	1.19818	3.50999	3.60763	0.697062	0.559149	0.715103	0.846874	1.34897	1.57705	0.29537
TCGA_BF_A9VF	high	0.95509	2.20101	1.21952	0.737514	3.38972	0.284751	1.36003	0.427821	0.14104	0.0277203
TCGA_D3_A8GV	high	2.51561	3.57611	3.99501	1.63854	4.9164	0.935158	1.57308	0.737514	0.983824	0.119688
TCGA_D3_A51E	low	5.01318	4.90473	4.90173	4.3052	3.42453	3.23984	3.27632	3.4095	2.43486	1.28865
TCGA_EB_A551	low	6.39656	4.51521	5.56131	5.40017	3.68565	4.16953	4.51003	3.37512	2.54528	1.54186
TCGA_FR_A728	low	4.30562	4.4349	4.37004	3.36631	5.97258	2.92537	2.70352	2.55988	1.15238	0.708761
TCGA_GN_A263	high	0.867976	2.15588	3.14021	0.173639	1.55105	1.44228	2.12307	1.72953	0.306029	0.531868
TCGA_ER_A19E	high	1.89441	4.17889	3.94601	1.35038	0.85591	1.32527	1.146	1.76778	2.06399	0.782576
TCGA_DA_A95V	high	4.18627	4.12653	3.19508	2.96144	1.66603	2.38874	3.5954	1.6746	1.55748	0.587653
TCGA_D3_A3ML	high	0.687956	1.55518	1.15114	0.236462	0.177471	0.205768	0.398569	0.488618	0.185359	0.0184917
TCGA_ER_A2NE	high	0.484705	2.17926	0.996316	0.115166	4.64392	0.0802483	1.09187	0.609377	0.392647	0.133037
TCGA_W3_AA1R	low	3.9533	2.70301	3.37373	3.02836	4.71981	2.19771	2.24458	1.90335	0.953228	0.453439
TCGA_ER_A3ET	low	2.1517	4.96301	5.12926	2.27346	2.26427	2.42881	3.16593	3.80963	2.84227	1.24793
TCGA_EB_A82B	low	4.49515	4.21618	3.69642	3.0424	2.38355	2.25311	2.56326	3.11297	1.28197	0.446997
TCGA_EB_A85J	low	5.85743	4.77657	4.51692	4.28446	2.9694	4.2135	3.07176	2.43477	1.76396	1.42546
TCGA_EE_A182	high	2.89585	4.66011	3.05844	2.59122	2.5359	0.459956	0.792022	0.734569	2.04939	0.200504
TCGA_ER_A3EV	high	3.78189	3.37717	3.73821	1.5787	2.13478	2.57657	1.30591	1.46916	1.57226	0.334111
TCGA_ER_A1A1	low	5.0357	6.6038	5.14115	5.96541	5.28937	5.55777	3.19994	3.57937	3.6251	5.1109
TCGA_ER_A2NC	high	2.78536	6.26484	6.09853	1.73972	1.1939	1.27703	4.22893	3.33911	3.83034	0.456701
TCGA_ER_A42K	high	1.03984	3.28586	3.55795	0.315914	0.945083	0.784504	1.33199	0.883152	1.28445	0.592541
TCGA_DA_A1I4	high	0.954047	4.62206	6.03685	0.602267	0.570074	0.595313	1.78262	2.66004	3.30333	0.51005
TCGA_FS_A4FC	low	3.1253	4.35885	3.58944	2.40705	2.42927	2.23582	2.58294	1.91115	1.59192	1.09761
TCGA_D3_A8GL	low	0.884637	2.53508	1.80946	0.064469	1.61311	0.0447438	1.27644	0.519341	0.554736	0.245739
TCGA_FS_A1ZS	high	2.20571	3.9354	4.12622	1.19503	0.881586	1.10219	1.88276	2.76033	2.34511	0.699729
TCGA_D3_A1Q5	high	1.97012	3.61588	1.95877	1.09356	6.17448	0.647176	1.00935	0.620868	0.23217	0.135929
TCGA_EE_A29M	low	4.95345	4.1406	4.28422	3.39702	4.48805	3.76627	3.64757	2.67322	1.71765	2.16131
TCGA_EB_A82C	high	1.09112	2.47397	1.58708	0.335826	0.37128	0.301002	0.880411	0.472384	0.469157	0.0309716
TCGA_EE_A29T	low	3.87005	4.56302	5.63239	2.53	2.27113	3.31098	3.2003	3.45228	3.3769	1.15976
TCGA_EE_A2GN	high	2.0497	3.66385	3.41837	1.50106	0.692963	1.0588	1.27274	1.93964	1.95498	0.395831
TCGA_EB_A3Y7	high	1.15969	2.9692	1.16691	0.316493	4.43747	0.189919	1.38604	0.129613	0	0
TCGA_EE_A3J5	low	4.75612	4.20121	4.77337	4.30114	2.79231	3.16806	2.79375	2.96438	2.25807	1.36648
TCGA_EB_A5SH	high	1.67902	3.73152	1.80385	1.82546	0.594453	1.25308	0.857344	0.763836	1.27763	4.12028
TCGA_EE_A2GJ	low	5.01338	4.83202	5.90592	4.15687	2.24169	3.10784	3.18304	4.03198	3.03355	1.34415
TCGA_W3_AA1O	high	1.00231	2.8934	2.46349	0.563646	2.81991	0.531369	1.73335	0.995665	1.10729	0.0912598
TCGA_WE_A8ZM	high	0.803475	3.97323	1.26099	0.219835	3.54133	0.0795658	0.636358	0.910502	0.266277	0.0805212
TCGA_ER_A3PL	low	2.55336	3.17723	3.5926	1.29184	0.942984	0.998051	2.36706	1.80645	2.1798	0.224411
TCGA_DA_A3F3	high	2.21565	3.64331	3.31401	2.45083	1.45154	1.72142	2.919	2.89445	1.21045	0.591009
TCGA_EE_A2GB	low	1.86315	3.33931	2.92867	1.79335	1.49789	1.29184	1.97728	1.98565	1.49144	0.603787
TCGA_EE_A2M8	low	7.43202	6.1656	6.62864	6.72896	4.61851	5.71288	4.38849	4.83544	3.67428	3.58176
TCGA_EB_A5SG	low	6.7385	5.02024	6.19074	6.12839	4.19996	4.93495	3.97374	4.4211	2.84392	2.20342
TCGA_D3_A1QB	low	7.22908	4.92467	6.15925	6.43453	3.9509	4.87142	3.64302	3.78535	2.27727	2.48849
TCGA_EE_A3JE	low	6.33223	4.94218	6.48545	5.05532	4.73665	4.93181	4.99048	4.80371	2.56125	2.5284
TCGA_WE_A8JZ	high	1.79826	4.63081	2.48504	1.90808	1.47861	1.55822	1.72233	1.32803	0.794104	0.583519
TCGA_GN_A9SD	low	3.41558	6.23998	4.28955	3.90452	4.7976	3.80871	1.83742	2.53094	1.72247	3.5277
TCGA_FS_A4F2	high	0.715278	3.61892	3.58396	0.35682	0.6107	0.330673	1.01899	1.25773	2.12439	0.479127
TCGA_EE_A2GH	low	6.16778	4.50568	5.19654	4.42447	3.57565	4.27593	2.70308	3.50365	1.77888	1.55636
TCGA_BF_AAP7	low	6.13579	4.54122	4.90948	4.63043	2.86017	3.51016	2.48931	1.82142	2.01778	0.933044
TCGA_D9_A3Z3	low	3.50946	5.06436	3.96438	3.96242	2.13264	2.54052	2.41568	2.5455	1.69421	1.28191
TCGA_D3_A51T	low	3.13659	3.95558	3.61833	2.78304	3.11874	2.15449	2.1921	2.02244	1.31098	0.911653
TCGA_EE_A2M6	high	3.74971	4.7739	5.25844	2.25251	2.32037	2.11217	2.03298	1.85272	3.57245	0.513491
TCGA_WE_AAA0	low	2.95125	4.23277	2.94952	2.44196	2.92031	2.25671	1.81787	1.73604	0.806778	1.90018
TCGA_FS_A4FD	high	3.36808	4.79807	3.01082	2.71165	1.74179	1.79539	1.93251	1.97937	1.77526	0.620493
TCGA_DA_A960	high	0.400319	1.78551	0.461214	0.208268	0.968496	0.0959919	0.561497	0.0542233	0.269033	0.0184917
TCGA_EE_A3AA	low	4.92751	4.83745	4.3442	3.92547	2.55611	3.71603	2.70334	3.86864	2.61186	2.57718
TCGA_D3_A1Q8	low	1.86346	5.37144	4.59647	1.39632	1.1149	1.691	1.03217	2.34463	2.54992	1.23266
TCGA_EE_A3AB	low	2.58313	5.71679	5.4512	2.28063	4.69233	1.89771	1.20989	2.73325	4.03107	0.506196
TCGA_BF_AAP6	high	0.879784	2.93717	2.23389	0.754289	1.87291	0.702303	1.27358	0.92691	0.63385	0.230818
TCGA_EE_A3AF	high	3.38841	3.90589	4.94637	3.08582	1.62452	1.93603	2.08946	2.56939	2.75298	0.815575
TCGA_FS_A1ZY	high	0.688315	2.27947	1.50437	0.219215	0.377068	0.0681893	0.364348	0.165172	0.657731	0.0387171
TCGA_EE_A17Y	high	1.26903	3.03624	2.47046	0.63951	4.88016	0.216238	0.47467	1.07977	0.65306	0.0244615
TCGA_D3_A3C6	low	1.37679	3.09648	2.61645	0.261471	0.385044	0.233765	0.902421	0.773743	1.24434	0.157561
TCGA_ER_A19Q	low	4.03401	4.98588	5.61068	3.6188	1.71449	3.06588	3.50238	3.90368	3.42905	1.24336
TCGA_D3_A2J8	low	6.81155	6.00413	5.63202	4.35688	4.27179	4.63017	5.72421	6.6317	2.92123	2.12108
TCGA_ER_A19P	low	6.31457	5.89165	6.19643	6.13656	5.04057	5.37908	3.82126	4.33076	3.61777	3.8172
TCGA_W3_AA1W	low	7.86295	5.83692	6.40756	6.83816	5.3049	5.869	5.04005	4.87104	3.64632	3.01798
TCGA_FS_A1Z7	high	1.56062	5.02725	4.75066	0.929109	1.02701	0.977756	1.04831	1.73929	2.66207	0.310456
TCGA_D9_A1JX	low	5.97612	5.51697	5.20876	4.70416	3.02118	3.8673	2.91829	3.20306	3.03101	1.75086
TCGA_XV_AAZV	low	4.51008	5.18263	5.06572	2.84784	3.2417	2.52537	2.07847	2.4972	1.94654	0.799419
TCGA_DA_A1HV	low	5.76728	5.31754	5.43774	4.91551	3.44065	3.86425	3.14768	3.60317	2.92712	1.28315
TCGA_D3_A2JH	low	7.80265	5.70262	6.74751	6.78297	5.20079	4.97116	3.81347	3.96889	3.20398	3.26677
TCGA_EE_A2MM	high	2.30372	3.53268	3.41156	1.60355	1.72762	1.50848	2.21496	3.82119	1.51278	0.608336
TCGA_D3_A3CE	low	4.88259	5.10122	4.37062	4.22699	3.14918	3.66497	2.52324	2.74078	2.58191	1.44159
TCGA_EB_A6QZ	low	0.942834	3.25648	2.02552	0.435095	0.393526	0.35095	0.767655	0.527571	0.479438	0.0783366
TCGA_EE_A2ML	low	5.68345	4.31916	4.62795	4.48381	3.06198	3.98856	3.97113	3.48629	2.92184	2.06188
TCGA_FS_A1ZP	high	2.12918	4.43287	4.61407	1.98634	1.05026	2.51927	2.91043	2.46292	3.07709	1.59526
TCGA_EE_A29H	high	2.79179	3.77913	3.55163	2.76101	2.19802	2.26466	2.13047	1.9077	1.31203	0.924252
TCGA_HR_A5NC	high	0.915559	4.00453	2.53767	0.792356	0.325502	0.602932	1.35637	1.17773	1.5362	0.169925
TCGA_FS_A1Z3	high	1.16453	3.23301	2.14222	0.532267	2.643	0.667938	1.30317	0.940355	0.568908	0.458802
TCGA_EE_A2MR	low	4.98872	6.21498	5.86324	5.6291	4.07612	4.91873	5.63281	5.73361	2.99881	4.34519
TCGA_FS_A1ZC	high	1.63101	2.86961	2.90699	0.130272	0.721066	0.134352	0.419862	0.493135	1.09221	0.0518593
TCGA_EB_A42Z	low	2.09207	3.3609	2.96188	1.51435	1.18339	1.39435	1.74971	2.03288	0.813196	0.306146
TCGA_FR_A726	high	1.71356	3.38467	2.59338	0.560324	1.01664	0.689478	1.12102	1.35338	0.791356	0.132906
TCGA_EB_A5KH	high	0.622556	2.98868	1.4678	0.811389	0.127633	0.417596	0.214871	0.376624	0.774249	0.196859
TCGA_FS_A1YW	low	1.00101	3.39957	2.72992	0.852079	0.858856	1.31104	1.73877	2.02109	0.741143	0.908352
TCGA_FS_A1ZB	high	1.64542	5.30747	5.11297	1.36955	1.76243	1.39413	1.23799	1.89235	3.02816	0.767909
TCGA_GN_A8LL	high	3.31129	4.17631	1.45954	2.20283	0.641361	0.524866	0.489337	0.339479	0.581303	0.0363275
TCGA_EE_A29A	high	0.751035	3.71111	2.46642	0.22848	3.81253	0.130272	1.96665	1.06702	0.708585	0.188528
TCGA_EE_A2A2	low	2.69403	3.68969	3.70056	2.74384	2.51243	2.61499	2.27715	2.18476	1.41927	1.74953
TCGA_EB_A4OZ	high	5.56323	4.65356	3.84472	3.79623	1.95367	1.81164	1.41078	0.934479	0.880176	0.0859685
TCGA_EE_A2MF	low	4.76294	3.97239	4.30361	2.70832	1.86156	2.28561	2.13629	2.40985	2.46848	1.21045
TCGA_ER_A198	low	4.12408	4.30657	5.04699	2.96634	5.36104	2.84699	2.88567	2.63524	3.03057	0.870424
TCGA_XV_AB01	high	3.72121	4.57618	3.06148	2.68972	0.545573	0.947404	0.442652	0.89476	1.57807	0.308477
TCGA_EE_A2GP	low	2.75655	4.7688	5.28355	1.95535	1.99244	2.11617	2.81601	3.04179	2.98309	1.10688
TCGA_EE_A3AG	high	1.88362	3.70134	2.98501	0.245374	3.57621	0.37951	0.405448	0.520045	1.60364	0.0437644
TCGA_EB_A24D	high	2.16411	3.08088	2.54332	2.09427	1.94516	1.74859	1.31996	1.82676	0.454597	0.878451
TCGA_XV_AAZY	high	3.71708	4.07145	2.73587	2.15989	1.32636	1.70204	1.02013	0.544288	1.0036	0.257011
TCGA_DA_A1I5	low	3.77981	4.86066	5.39756	3.13078	3.47263	3.36018	4.14095	2.73736	2.33328	1.41986
TCGA_EE_A2M7	low	2.28718	7.71557	2.68607	2.09326	6.83393	2.67401	1.64801	1.95516	1.69403	2.57995
TCGA_DA_A1HY	low	1.87267	4.62391	3.18202	0.966947	5.05329	0.614945	2.62859	1.68109	1.07382	0.191057
TCGA_ER_A19G	low	5.57951	4.54943	5.057	2.52907	3.33249	3.14656	5.1	4.146	2.89825	1.10869
TCGA_D3_A2J6	low	5.8824	2.89513	4.58044	4.2375	1.56306	2.37384	2.0197	1.91671	1.1133	0.381726
TCGA_DA_A1I2	low	3.56756	4.13077	3.86331	2.67647	1.86485	2.47283	2.6212	3.15062	1.45365	0.862193
TCGA_D3_A8GJ	low	7.18782	5.11842	5.24507	5.04109	4.84624	4.32782	4.54237	3.39573	2.46127	1.63297
TCGA_GN_A262	high	0.809579	1.42331	0.237564	0.0554733	0.690819	0.0193461	0.263034	0.204141	0.0287106	0.0641931
TCGA_FS_A1ZN	high	1.40746	3.02294	2.03252	0.86481	0.785843	0.421371	2.14955	1.2441	0.719052	0.131458
TCGA_DA_A95W	low	3.5827	3.16366	3.04525	2.78266	1.5564	1.90666	2.4603	1.54681	1.40714	0.720103
TCGA_EB_A5SF	high	0.27262	4.54681	1.14913	0.302407	0.214	0.0343566	0.192573	0.380286	0.281431	0

## Sheet: S7
Chemotherapeutic drugs (estimated IC50)
SampleID	risk	ATRA	ABT.888	Etoposide	AZD8055	Cisplatin	Bosutinib	Gefitinib	GDC0941	Lenalidomide	Methotrexate
TCGA_DA_A1I8	low	5.8525	5.33948	2.65791	0.563068	3.94696	2.54984	2.45686	2.24654	5.59761	1.22203
TCGA_WE_A8ZT	low	5.21628	5.55845	1.40743	0.37703	3.46965	3.66774	2.33344	2.18984	5.43959	1.02153
TCGA_D3_A8GR	high	5.74309	5.44527	3.07852	0.638625	3.96681	2.69605	1.5148	2.32785	5.25993	1.25967
TCGA_BF_A5EO	high	5.63237	5.34753	3.1508	0.655219	3.79007	2.75974	1.99242	2.30258	5.49552	1.27744
TCGA_ER_A19T	high	5.51082	5.48188	1.76665	0.364408	3.68222	2.62976	2.80446	2.1627	5.46224	0.936557
TCGA_ER_A19N	low	4.92849	5.19233	2.1682	0.302693	3.48209	2.79818	1.33037	2.10429	5.27416	0.908696
TCGA_EE_A29P	low	4.67316	5.00116	1.62213	0.274945	3.38848	2.71794	1.39313	2.06411	5.18656	0.787481
TCGA_EE_A29N	low	5.19811	5.28138	1.66077	0.356772	3.50625	2.61865	2.25269	2.24853	5.34689	0.798335
TCGA_ER_A2NF	high	5.39055	5.58026	2.17482	0.345128	3.56967	2.75482	1.39842	2.0867	5.40534	1.05653
TCGA_GN_A8LN	low	5.18313	5.31168	1.58426	0.278312	3.06203	2.48713	2.18718	2.11394	5.44637	0.843234
TCGA_FS_A1ZZ	low	5.21864	5.57919	1.27102	0.305164	2.80959	3.06893	2.69616	2.24358	5.50717	1.01166
TCGA_ER_A19A	low	4.83318	5.19	2.08854	0.323867	3.42641	2.63128	1.10174	1.95524	5.34723	0.771831
TCGA_D3_A3MV	low	5.37364	5.45065	0.990868	0.35634	3.33049	2.39778	2.67558	2.24021	5.46202	0.868856
TCGA_ER_A19H	low	4.53335	5.15643	1.51403	0.113997	2.96883	2.70497	1.96988	2.04536	5.22315	0.606948
TCGA_EE_A3AD	low	5.21576	5.64048	1.22079	0.318691	3.14419	2.70669	2.35996	2.21063	5.51798	1.05223
TCGA_FS_A1ZW	low	4.81946	5.2878	1.43462	0.518621	2.73978	2.68055	1.64633	2.13474	5.12077	0.743791
TCGA_DA_A3F8	low	4.89579	5.12107	1.60485	0.366363	3.27101	2.6544	1.31551	2.10285	5.21529	0.809234
TCGA_D3_A1Q6	high	5.56752	5.54587	1.21795	0.441275	3.71005	2.91158	2.43325	2.24084	5.63349	1.04263
TCGA_ER_A199	low	4.90607	5.13918	1.57302	0.231453	3.26182	2.86909	1.90059	2.13628	5.21544	0.681819
TCGA_D3_A51N	low	5.48609	5.25161	2.25205	0.542801	3.57115	2.76346	1.46916	2.2337	5.33237	1.14111
TCGA_FR_A729	low	4.39914	4.91454	1.95442	0.307317	3.41566	2.82126	1.22046	2.07654	5.12995	0.506256
TCGA_DA_A3F5	high	5.83771	5.44561	2.68503	0.581813	3.95797	2.82732	2.70374	2.27418	5.64678	1.01544
TCGA_D3_A8GS	low	4.892	4.97378	1.56797	0.321061	3.17148	2.35593	1.26604	2.15043	5.14661	0.75964
TCGA_D3_A2JD	high	5.6112	5.4501	2.95858	0.543229	4.20341	2.9395	2.20044	2.24175	5.48844	1.12707
TCGA_BF_A1PV	high	5.22929	5.49878	1.35548	0.138383	3.50105	3.05257	2.76551	2.14896	5.50442	1.01436
TCGA_EB_A24C	high	5.28479	5.63284	1.79107	0.371452	3.57785	2.54918	1.83403	2.20645	5.46164	1.13483
TCGA_GN_A4U7	high	5.79107	5.74687	3.57326	0.690883	3.82096	3.21499	2.00217	2.43237	5.59943	1.31253
TCGA_EB_A5SE	high	5.25457	5.56996	1.51156	0.360773	3.24372	3.15548	2.15645	2.22499	5.47877	1.00157
TCGA_BF_A3DN	low	5.54485	5.73894	1.76189	0.345252	3.26078	3.72088	2.72422	2.16999	5.56164	1.15836
TCGA_EB_A44N	high	5.2679	5.46907	1.78994	0.503152	3.47636	2.44168	0.982586	2.16227	5.43477	1.0286
TCGA_BF_A5ER	high	5.884	5.55722	2.78314	0.585105	4.03269	2.62067	1.94885	2.28879	5.48806	1.39537
TCGA_EB_A5VU	high	5.39766	5.67801	1.65815	0.399393	3.50302	2.74458	2.18167	2.15767	5.51144	0.973628
TCGA_EB_A299	high	5.576	5.42365	2.30179	0.622517	3.32291	1.87643	0.575436	2.25494	5.46991	1.17006
TCGA_EB_A6L9	low	5.48031	5.29572	3.21203	0.485893	3.80902	2.94521	1.14267	2.08573	5.40524	1.02616
TCGA_FS_A1ZQ	high	5.66492	5.5693	3.26876	0.564008	4.48197	3.43323	2.43001	2.34138	5.65832	1.21669
TCGA_D3_A5GL	high	5.43645	5.47888	2.35515	0.454835	3.25876	2.93717	2.36759	2.3614	5.50771	1.18083
TCGA_EE_A180	low	5.40965	5.52959	1.06425	0.337006	3.23114	3.56804	2.88781	2.24241	5.4521	0.998338
TCGA_WE_A8ZQ	high	5.44936	5.51491	1.7306	0.274227	3.81706	3.6403	2.44879	2.10678	5.53494	0.975681
TCGA_EE_A29V	high	5.56702	5.69268	2.43777	0.496044	3.9606	3.33151	2.37599	2.26727	5.63488	1.27746
TCGA_EE_A2MQ	high	5.39233	5.5056	2.15047	0.39142	3.12733	3.21792	2.85442	2.14128	5.52124	0.887986
TCGA_EE_A3JD	low	4.57813	4.90143	1.79172	0.312291	3.1116	2.49451	1.46548	2.02866	5.10079	0.454424
TCGA_ER_A19C	high	5.58206	5.70537	2.17129	0.448126	3.78577	3.1869	2.39459	2.22037	5.5326	1.18251
TCGA_D3_A2JB	low	4.58877	4.9477	2.02356	0.233002	3.73472	2.50032	1.06278	2.06163	5.07625	0.596706
TCGA_ER_A3ES	high	5.25268	5.68162	1.45924	0.362094	3.06381	2.89229	1.95253	2.24223	5.33682	0.928179
TCGA_EE_A3JI	low	4.86484	5.31776	0.753252	0.228361	3.07569	2.795	2.66234	2.24412	5.1398	0.628649
TCGA_EE_A2GU	low	4.7995	5.29771	1.2327	0.262489	3.32009	2.54637	2.3124	2.20893	5.28215	0.665528
TCGA_FS_A4F9	high	5.58266	5.66125	2.25977	0.41214	3.48822	3.34147	2.66629	2.21091	5.46125	0.928293
TCGA_FS_A4FB	high	5.30586	5.464	1.9154	0.513258	3.1282	3.37491	2.06093	2.21074	5.47689	1.06639
TCGA_EB_A5VV	low	3.66605	4.27918	1.20976	0.0132584	3.36882	1.58955	-0.366749	1.87078	4.85196	-0.11169
TCGA_FS_A1ZU	high	4.76397	5.3731	0.443084	0.00288427	2.73474	3.27212	2.03648	2.11545	5.24796	0.673317
TCGA_FS_A1ZA	high	5.13863	5.19155	0.987364	0.296414	3.3037	1.96998	2.44458	2.11855	5.33169	0.856706
TCGA_ER_A2ND	high	5.56418	5.52713	2.25559	0.470917	3.62685	2.73394	1.47888	2.28377	5.3866	1.21296
TCGA_EB_A4IQ	high	5.64941	5.64447	2.53582	0.669196	4.13212	2.14632	1.36217	2.35637	5.49564	1.23082
TCGA_3N_A9WB	high	5.58582	5.531	1.35945	0.299973	3.43496	3.21808	2.27107	2.26344	5.47132	1.16811
TCGA_EE_A2A5	high	4.75036	5.30572	0.986909	0.122185	2.96586	3.20558	2.30538	2.00039	5.2722	0.76533
TCGA_ER_A19F	low	5.09571	5.42848	1.44754	0.207363	3.00945	2.71558	2.56524	2.22001	5.34445	0.898797
TCGA_RP_A690	high	5.57983	5.62569	1.22989	0.289786	3.85553	2.33623	1.73967	2.2333	5.39823	1.0853
TCGA_BF_A5EP	high	5.55744	5.4433	2.63842	0.559502	3.58779	3.12872	2.1071	2.34875	5.44135	1.22959
TCGA_D3_A3C7	low	5.63534	5.38565	2.68673	0.582832	3.80155	2.69926	1.81271	2.20299	5.46412	1.12249
TCGA_BF_AAP4	low	5.22895	5.53961	1.71833	0.403887	4.17478	3.54351	2.66863	2.29641	5.43429	0.973523
TCGA_EE_A2GS	low	4.77406	5.32449	0.773937	0.20002	2.83296	3.51339	2.37896	2.11762	5.37274	0.76595
TCGA_D3_A3MR	low	5.27873	5.12602	2.67	0.456966	3.35346	2.71761	1.21603	2.10363	5.24414	0.983942
TCGA_BF_A3DJ	low	5.22514	5.31111	2.00409	0.427178	3.05997	2.08765	1.62037	2.16197	5.36835	1.04424
TCGA_D3_A3CF	low	4.82751	5.23536	2.00773	0.258541	3.86357	2.94695	1.80446	2.16452	5.28677	0.791368
TCGA_EB_A3XD	high	5.78994	5.73059	3.18721	0.604429	4.17253	2.41108	1.04387	2.18762	5.60698	1.28358
TCGA_DA_A1I0	high	5.7579	5.44281	2.87717	0.426357	3.85298	2.49439	1.73442	2.20285	5.59816	1.29772
TCGA_D3_A8GD	low	4.32671	4.86313	0.967327	0.3062	3.68761	2.4435	1.31806	2.12318	5.1153	0.468057
TCGA_D9_A4Z3	high	5.05172	5.28758	1.46743	0.384419	3.1573	2.37818	1.59849	2.24401	5.19286	0.726487
TCGA_BF_AAP2	low	5.32399	5.42021	1.60179	0.302908	3.51592	2.71956	2.14195	2.22502	5.40786	0.957826
TCGA_EE_A2GD	high	5.54653	5.57504	2.22358	0.250162	2.98823	3.20324	2.38401	2.05263	5.60377	1.11446
TCGA_EE_A29D	high	5.33983	5.68876	1.09567	0.260686	3.06993	2.73981	2.54563	2.22591	5.50033	1.00186
TCGA_GN_A8LK	high	5.6782	5.72809	2.30344	0.517832	3.9667	3.30885	2.5616	2.40715	5.61793	1.25081
TCGA_EB_A44P	low	5.16589	5.4181	0.895975	0.389888	3.07852	2.99347	2.22435	2.22361	5.3951	0.961827
TCGA_FS_A1ZF	high	5.05716	5.45401	2.00004	0.45886	3.07812	3.28656	2.01843	2.20922	5.48571	0.884835
TCGA_FS_A4F8	low	5.04983	5.04743	2.08877	0.251332	3.7032	2.53232	1.1493	1.95238	5.22533	0.623353
TCGA_D3_A51H	low	4.1875	4.51196	1.89115	0.158378	3.75412	2.09919	0.174476	1.99823	4.89218	0.227526
TCGA_YG_AA3P	high	4.92612	5.59566	1.19488	0.194334	3.44259	2.57392	1.73283	2.05789	5.3576	0.774148
TCGA_BF_A1PX	low	5.35431	5.33279	2.06272	0.491747	3.37368	2.46811	0.9336	2.17004	5.42266	1.12823
TCGA_EB_A57M	high	5.7943	5.73703	3.53485	0.577082	4.05355	2.99096	1.62527	2.1494	5.68586	1.38297
TCGA_EE_A2GM	low	5.3002	5.57754	1.78873	0.519119	3.26123	2.6521	2.337	2.32252	5.39517	1.0282
TCGA_GN_A266	low	4.67841	5.0891	2.10597	0.289634	3.16192	2.99485	1.85422	1.96936	5.30782	0.77176
TCGA_FS_A4F5	high	5.52743	5.56597	2.27007	0.524752	3.66136	3.38948	2.69387	2.27141	5.4672	1.14129
TCGA_EE_A3AE	low	4.87779	5.37809	1.0663	0.362161	2.95366	2.59529	1.97748	2.19169	5.3009	0.817048
TCGA_BF_A5EQ	high	5.27004	5.48556	2.19933	0.410395	3.51789	3.19517	2.0067	2.11972	5.42602	1.02543
TCGA_FR_A69P	high	4.87511	5.54203	1.3252	0.25367	2.86563	3.29998	2.17116	2.15077	5.43119	0.675933
TCGA_W3_A828	high	5.22349	5.63072	1.71814	0.345408	3.57305	3.55863	2.05726	1.93141	5.75085	1.06125
TCGA_HR_A2OG	low	5.33611	5.23952	2.4052	0.438493	3.19196	2.66169	1.81833	2.04517	5.34131	0.99365
TCGA_EB_A3XB	low	5.47177	5.61413	2.31301	0.426596	3.68962	2.8941	2.40389	2.24383	5.50983	1.08626
TCGA_W3_A825	high	4.62377	5.08097	1.78961	0.256563	3.60043	2.49182	1.89865	2.02817	5.425	0.556052
TCGA_EE_A3JA	low	4.80475	5.49758	0.725223	0.119303	2.50135	2.70913	2.2358	2.08644	5.21412	0.787167
TCGA_BF_AAOX	high	5.48814	5.69897	2.39637	0.554882	3.77711	2.93442	1.84956	2.29327	5.55047	1.22567
TCGA_EB_A44R	low	4.60239	5.09566	1.21936	0.0782456	3.7083	2.99168	1.9284	2.09766	5.15385	0.674315
TCGA_WE_A8ZY	high	5.39475	5.59377	1.52823	0.453056	3.00797	3.01829	3.23889	2.27648	5.51633	0.9267
TCGA_ER_A19B	high	5.75429	5.4975	2.2109	0.467727	3.01291	2.72478	2.22461	2.22235	5.54906	1.17426
TCGA_WE_A8ZX	low	4.35538	5.02598	2.46833	0.306973	2.78815	2.53356	0.902565	2.14349	5.15253	0.54091
TCGA_XV_AAZW	high	5.54236	5.5736	2.08057	0.606798	3.02032	2.60761	1.23546	2.22884	5.53433	1.20962
TCGA_EE_A3AC	low	4.84084	5.03607	1.1669	0.246569	3.38686	2.45344	2.2491	2.19061	5.16124	0.707397
TCGA_D3_A8GB	high	5.45954	5.26534	3.32618	0.529446	3.92127	2.58612	0.567737	2.14336	5.28618	1.09922
TCGA_EE_A29Q	high	5.62601	5.63809	1.21483	0.33407	3.29614	2.60713	2.63587	2.26276	5.47598	1.0228
TCGA_EB_A5UM	high	5.26819	5.26747	1.7433	0.399049	3.80259	2.07475	1.33889	2.22438	5.26266	0.932047
TCGA_ER_A2NB	high	6.15452	5.68989	3.43465	0.882457	3.71725	2.07065	-0.0329013	2.32645	5.60925	1.6714
TCGA_GN_A26D	high	5.56448	5.48778	1.63494	0.233042	3.67073	2.84751	2.39075	2.18277	5.47067	1.04696
TCGA_D3_A8GK	high	5.34588	5.54524	1.02077	0.41191	3.14355	2.77441	2.29385	2.31128	5.40592	1.08142
TCGA_EE_A2MD	high	4.8865	5.46877	1.10466	0.202235	4.13417	3.07418	2.18949	2.23426	5.2448	0.790804
TCGA_FS_A1ZH	low	4.84413	5.1251	1.6703	0.255986	3.31299	2.69335	2.17996	1.92283	5.33757	0.626916
TCGA_FR_A8YD	high	5.91285	5.68557	2.56685	0.663492	4.27207	3.92152	2.19436	2.31808	5.65151	1.33398
TCGA_Z2_AA3V	high	5.52165	5.39734	3.92277	0.576548	4.60069	3.00342	1.29429	2.24674	5.47878	1.27575
TCGA_ER_A42H	high	4.81408	5.32029	1.46453	0.170706	3.40479	3.26745	1.96567	2.06509	5.3989	0.7412
TCGA_D3_A8GI	high	5.91189	5.72869	3.36536	0.661274	4.13862	3.48667	2.36509	2.25855	5.68274	1.38918
TCGA_EE_A20I	low	5.41362	5.46391	1.99027	0.387607	3.38983	3.03737	2.70589	2.24301	5.45564	1.09021
TCGA_XV_A9VZ	high	5.10176	5.40205	0.920063	0.35397	3.25042	1.69933	0.952635	2.07089	5.47567	0.74051
TCGA_D3_A2JC	low	5.23411	5.47762	1.65337	0.444057	3.18547	3.12224	2.05389	2.19507	5.45365	1.06947
TCGA_EB_A41A	high	5.21576	5.42143	1.62731	0.338346	3.20547	2.67863	2.21185	2.19934	5.34388	1.04938
TCGA_EE_A29W	high	5.35778	5.38091	0.891447	0.243328	2.9517	3.07289	2.70531	2.0061	5.41602	0.708847
TCGA_WE_A8K5	high	5.12238	5.49594	0.927942	0.343571	3.40631	3.18242	2.05246	2.07711	5.44083	0.88298
TCGA_D3_A3BZ	low	5.19299	5.49662	2.29956	0.263885	3.65644	3.34621	1.93775	2.0905	5.51707	1.01481
TCGA_D9_A4Z2	high	5.14456	5.34354	1.69331	0.386795	3.37898	2.63426	2.18859	2.14841	5.37109	0.894471
TCGA_EE_A20F	low	5.10866	5.36588	1.85799	0.342162	3.37681	2.89653	1.88575	2.24021	5.43159	0.948986
TCGA_XV_A9W5	high	5.58741	5.46285	1.69776	0.599196	3.4636	2.77734	1.67318	2.18027	5.47465	1.19836
TCGA_EE_A29G	high	5.5284	5.58997	2.42331	0.580321	3.97898	2.61631	1.20513	2.18569	5.50083	1.12016
TCGA_D9_A148	high	5.66844	5.67178	1.87769	0.381573	4.0949	2.96826	2.45621	2.33303	5.55824	1.14135
TCGA_D3_A2JE	high	4.90269	5.5643	0.604402	0.0763552	2.63875	2.66033	2.43078	2.09842	5.40378	0.670156
TCGA_ER_A19S	low	4.8101	5.00688	1.86934	0.386045	3.4512	2.44701	1.2575	2.06919	5.09814	0.716825
TCGA_EB_A431	low	5.43453	5.60885	1.4721	0.444349	4.38223	3.12425	2.81535	2.3536	5.48063	0.974893
TCGA_EB_A6QY	high	5.49375	5.73416	2.85158	0.734144	4.36541	2.54043	1.93456	2.45099	5.5774	1.11784
TCGA_W3_AA1V	high	4.81816	5.34308	1.46426	0.35577	3.11772	2.83829	2.36866	2.00639	5.4799	0.82422
TCGA_BF_AAP1	high	5.49308	5.53386	1.40346	0.536468	4.08319	3.1888	2.42405	2.28774	5.57926	0.985802
TCGA_EE_A20B	low	5.33907	5.44701	1.62809	0.210899	3.24862	3.05361	2.50379	2.09441	5.44969	1.00199
TCGA_D9_A6E9	low	4.94608	5.13383	2.90767	0.442123	3.64788	2.838	1.43109	2.27698	5.30615	1.04548
TCGA_WE_AAA4	low	5.31658	5.31456	3.47189	0.505472	3.63356	3.02258	1.47984	2.16598	5.48028	1.23239
TCGA_EE_A3AH	high	5.51029	5.64365	1.47886	0.260083	2.9978	3.41608	2.88061	2.1171	5.58704	1.12329
TCGA_GF_A769	high	5.47363	5.40188	1.24695	0.477336	2.89145	2.38069	2.17488	2.23967	5.37056	1.03277
TCGA_FW_A5DY	high	4.98235	4.84842	1.80415	0.284174	3.44031	2.10328	0.994071	2.02882	5.08964	0.664264
TCGA_D9_A6EG	high	5.4137	5.69162	2.44722	0.352764	3.85893	3.36531	2.37328	2.24226	5.5361	1.02026
TCGA_GN_A4U5	low	5.33655	5.42975	1.60522	0.603778	3.35725	2.44512	1.27853	2.23661	5.455	1.12772
TCGA_DA_A95Y	high	5.78337	5.64627	3.20701	0.616802	3.94067	3.22938	2.3017	2.38177	5.57769	1.28824
TCGA_EB_A85I	high	5.66931	5.39481	2.40662	0.592495	3.81105	2.95949	1.77286	2.24909	5.48065	1.2752
TCGA_WE_A8K4	low	5.12492	5.32137	1.69171	0.396376	4.02615	3.05965	2.01331	2.30171	5.38869	0.916271
TCGA_FW_A3R5	high	5.14068	5.57005	1.53833	0.368522	3.79405	3.45234	2.64632	2.22049	5.45543	0.81661
TCGA_ER_A19L	low	5.66567	5.63713	2.63082	0.463198	3.85341	2.84121	1.61572	2.17643	5.55255	1.19118
TCGA_BF_A1PU	high	5.87146	5.86174	2.52009	0.529781	3.65033	3.22608	2.63966	2.30718	5.69559	1.3827
TCGA_FS_A1YX	low	5.25452	5.32793	2.09205	0.293253	3.4637	3.56173	2.33399	2.10474	5.37082	1.01994
TCGA_D3_A1QA	low	5.00141	5.41488	0.687271	0.0710395	3.34305	2.75647	2.93074	2.19009	5.35599	0.830496
TCGA_EE_A2M5	high	5.49512	5.45735	1.1064	0.253883	2.36827	2.46228	2.52713	2.14501	5.7264	0.9617
TCGA_D3_A1Q7	low	4.5214	5.16385	1.10879	0.24074	3.14662	3.07809	1.52918	1.98295	5.19482	0.660677
TCGA_DA_A3F2	high	5.46251	5.09578	3.92881	0.526038	3.6746	2.29694	0.149581	1.91753	5.35141	1.21651
TCGA_EE_A2MT	high	5.34773	5.43921	1.69468	0.389272	3.31334	2.66444	2.41344	2.2255	5.44416	1.00713
TCGA_ER_A2NH	low	5.07001	5.1622	1.74058	0.409277	3.3894	2.70566	1.74091	2.12795	5.37611	0.832488
TCGA_FS_A1YY	high	5.49944	5.65851	2.30838	0.354547	4.09525	3.01045	2.32322	2.2123	5.56379	1.18675
TCGA_ER_A19J	high	5.4224	5.45899	1.74198	0.292984	3.44004	2.66181	1.9815	2.07611	5.41888	1.03578
TCGA_EE_A2MP	low	5.42948	5.37958	1.62201	0.479522	3.78843	2.79129	2.21334	2.2693	5.45851	1.05101
TCGA_XV_A9W2	high	5.54406	5.64207	1.84391	0.551556	3.59392	2.1207	1.14444	2.27784	5.51039	1.20402
TCGA_D3_A8GP	high	5.25088	5.37021	1.60224	0.313709	3.57604	2.95558	2.43549	2.22445	5.34052	0.942396
TCGA_D9_A6EC	low	5.40249	5.52624	0.959987	0.426455	2.68688	3.03082	2.24841	2.2835	5.5823	1.12481
TCGA_EB_A5UN	low	5.82572	5.65368	2.15813	0.488044	3.50815	3.10829	2.48708	2.31084	5.57745	1.27004
TCGA_D3_A51K	high	5.10025	5.27725	2.24204	0.345914	3.00778	3.31667	1.49794	2.09707	5.34574	1.07737
TCGA_EE_A2GL	high	4.59543	4.93351	1.44797	-0.0165714	3.03039	2.50651	1.33694	2.02752	5.15855	0.465375
TCGA_GN_A265	low	5.13452	5.11631	2.35141	0.363417	3.23812	2.56878	1.46703	2.06582	5.30753	0.913086
TCGA_D9_A4Z5	low	5.22389	5.42838	2.01177	0.39974	3.34119	3.22905	2.15134	2.08282	5.42022	1.16986
TCGA_ER_A195	low	5.10415	5.09424	1.78313	0.261345	3.48561	2.84908	1.87699	2.02381	5.32554	0.758468
TCGA_EB_A4IS	low	4.61959	4.96543	1.93213	0.235064	3.20665	2.45925	1.52937	2.0252	5.16116	0.728601
TCGA_D3_A8GC	high	5.51154	5.5662	1.45546	0.356134	3.55508	2.97397	2.75778	2.24035	5.39692	0.902831
TCGA_WE_A8K1	low	4.82772	5.23096	1.12599	0.31067	3.67953	2.80389	2.32753	2.15435	5.14322	0.740631
TCGA_FS_A1ZM	low	5.28672	5.11481	2.3096	0.315983	3.42902	2.56212	1.54656	2.10657	5.30207	0.930669
TCGA_FS_A1ZD	high	4.82261	5.20763	1.04322	0.179876	3.05261	2.90351	2.47866	1.89731	5.37169	0.678083
TCGA_EE_A29C	high	5.54595	5.66039	2.67608	0.417803	4.43443	3.39003	2.55452	2.19412	5.62716	1.15008
TCGA_GN_A267	high	5.18709	5.30211	1.97028	0.475067	2.87443	2.86409	0.914794	2.12211	5.17877	1.01621
TCGA_DA_A95X	low	5.40386	5.37922	0.684211	0.378023	3.30516	2.63019	2.72948	2.23761	5.40137	0.877156
TCGA_EE_A17X	high	5.28283	5.53358	2.23736	0.543371	3.79589	2.88576	2.48835	2.33932	5.50362	1.04897
TCGA_EE_A29E	high	5.40808	5.59969	2.03336	0.437529	3.4904	3.18257	2.53197	2.27764	5.48095	1.14787
TCGA_BF_A3DM	low	5.2218	5.36165	1.08742	0.298396	2.9173	3.12848	2.51465	2.18725	5.49208	1.04389
TCGA_D3_A8GN	low	5.44494	5.35471	1.94947	0.498542	3.68232	3.19246	2.01283	2.16673	5.39665	1.1174
TCGA_ER_A19M	low	4.7907	5.29767	1.24127	0.320044	3.1394	2.91313	1.89154	2.1635	5.40471	0.759494
TCGA_GN_A26C	low	5.21972	4.99749	2.32497	0.40674	3.14281	2.5792	1.69089	2.05333	5.36045	0.911417
TCGA_EE_A2MJ	low	4.58063	5.14208	1.49239	0.275569	3.12852	2.9502	1.72064	2.10673	5.16541	0.591872
TCGA_ER_A196	high	5.70985	5.74665	1.86274	0.546904	3.60086	1.50379	1.24125	2.24311	5.58082	1.26358
TCGA_EE_A2GE	low	5.30963	5.21678	2.19724	0.276494	3.4936	2.43681	1.76964	1.96561	5.41071	0.942242
TCGA_QB_A6FS	high	5.56382	5.43665	2.87097	0.467061	3.7603	2.86206	1.70619	2.21109	5.46526	1.19683
TCGA_DA_A1I7	low	5.68225	5.50608	2.21679	0.466944	3.37357	3.00441	2.2508	2.09812	5.54079	1.21716
TCGA_ER_A197	low	4.9651	5.44593	1.87657	0.350557	3.41053	2.78459	1.63707	2.12799	5.33877	0.913381
TCGA_EE_A181	low	4.74842	5.23133	1.5824	0.21859	3.16096	2.96884	1.95344	2.0776	5.32018	0.774787
TCGA_FW_A3I3	high	5.07573	5.56828	1.19622	0.311112	2.6956	2.09504	1.5362	2.26009	5.4239	0.927231
TCGA_GF_A4EO	low	4.95899	4.98887	2.35636	0.467387	3.42446	2.42146	1.09752	2.08466	5.12772	0.789226
TCGA_EB_A4P0	high	4.94479	5.37517	1.70661	0.335514	3.15735	2.54499	1.58844	2.18396	5.36174	0.997053
TCGA_YG_AA3N	high	5.486	5.49766	2.89258	0.592591	3.77342	2.51974	1.41567	2.28387	5.39607	1.19896
TCGA_D3_A8GM	low	4.96948	5.35053	1.138	0.495151	3.24698	3.11463	2.22774	2.2296	5.2814	0.804466
TCGA_D3_A5GN	low	5.18429	5.27017	1.12332	0.370123	3.13652	2.80118	2.30023	2.08448	5.36543	0.902579
TCGA_EE_A29R	high	5.32594	5.67262	1.24851	0.196216	3.52667	3.44281	2.72414	2.13101	5.51906	1.01396
TCGA_QB_AA9O	high	5.15678	5.30949	2.12344	0.593338	3.58558	2.69912	0.961469	2.33736	5.29187	1.02255
TCGA_D9_A3Z1	high	5.24103	5.36886	2.06619	0.42309	3.64469	2.73865	1.79478	2.25969	5.36333	0.976833
TCGA_EE_A29S	high	5.20664	5.42905	1.34047	0.233765	3.05773	2.97402	2.54128	2.17052	5.51031	0.901462
TCGA_DA_A1IB	low	4.71908	4.93016	2.29855	0.299844	3.36474	2.10509	0.511146	2.05025	5.08811	0.654467
TCGA_EE_A3J4	low	5.43485	5.45922	1.71893	0.496266	3.12016	2.90395	2.02737	2.1547	5.4079	0.929803
TCGA_D3_A1Q3	high	4.93553	5.27903	1.21116	0.133438	3.5769	2.84473	2.26532	2.10961	5.29807	0.833493
TCGA_GF_A6C9	high	5.09859	4.97947	2.99781	0.418236	3.48669	2.43469	1.08137	2.03389	5.30062	0.822585
TCGA_EE_A3JH	low	5.14243	5.2382	2.26957	0.444256	3.42749	2.68118	1.40487	2.0967	5.269	0.914754
TCGA_ER_A193	low	5.46916	5.52364	1.9727	0.433245	3.78537	3.16921	2.03555	2.1198	5.45323	0.961608
TCGA_D3_A8GQ	high	5.1823	5.42076	1.30383	0.373326	3.11309	2.57835	2.49549	2.20424	5.52477	0.768974
TCGA_BF_A3DL	high	6.03088	5.81427	3.19571	0.644292	4.21811	3.57974	2.50804	2.33747	5.73532	1.47803
TCGA_D3_A5GS	low	5.47789	5.55679	1.87229	0.449614	3.9859	3.11735	1.87868	2.19589	5.50597	1.14075
TCGA_D3_A3MO	high	5.23608	5.36227	1.36763	0.32513	3.14547	3.3304	2.60363	2.11438	5.49821	0.864198
TCGA_EB_A51B	high	5.14153	5.38433	1.46026	0.390684	3.33034	2.77099	2.2464	2.19023	5.32643	0.960034
TCGA_D9_A1X3	high	4.94391	5.54499	1.59374	0.345486	3.1143	2.93157	2.82753	2.2009	5.47425	0.998631
TCGA_EB_A3XE	high	5.80167	5.74509	2.68098	0.491785	3.57684	2.52756	1.15488	2.251	5.60966	1.414
TCGA_EB_A5FP	high	5.30968	5.58285	1.74172	0.634247	3.53196	2.95782	2.34489	2.3643	5.47031	1.09229
TCGA_EB_A3XC	high	5.26828	5.60256	2.00895	0.658047	3.05697	2.78933	1.88083	2.32784	5.57286	1.03139
TCGA_FR_A7UA	low	4.49004	4.80725	1.95145	0.341958	3.4887	2.16607	0.659832	2.01684	5.09786	0.603353
TCGA_YG_AA3O	high	5.40461	5.59656	2.328	0.471682	4.00222	3.17877	2.35053	2.24803	5.44592	0.979917
TCGA_EE_A2GR	high	5.26595	5.67678	1.06259	0.240343	3.24207	2.89362	2.69499	2.22576	5.44602	0.965284
TCGA_LH_A9QB	high	5.47188	5.54292	1.31543	0.374088	3.38319	3.33064	2.54042	2.0881	5.40883	1.02574
TCGA_EB_A550	high	5.53426	5.53386	1.61017	0.684955	3.52992	2.04415	0.4358	2.26004	5.46906	1.20995
TCGA_WE_A8ZO	low	4.86106	5.3218	1.358	0.283233	3.08955	2.65741	2.28194	2.17447	5.26162	0.872688
TCGA_D3_A2JN	high	5.69393	5.24727	2.34104	0.433688	3.48287	3.14373	1.45194	2.07863	5.40432	1.06494
TCGA_ER_A194	high	5.80035	5.53928	2.92239	0.594305	3.8359	2.65151	1.43516	2.23977	5.46818	1.44519
TCGA_EE_A20C	high	5.5529	5.45821	0.774708	0.429375	2.63399	2.8574	2.57707	2.22138	5.33114	0.992392
TCGA_D3_A2J9	low	4.40622	4.90417	1.34508	0.184059	3.23882	2.26049	1.1528	2.01965	5.08633	0.514676
TCGA_RP_A694	low	5.03509	5.40339	1.11534	0.192625	3.54246	3.39229	2.34098	2.19079	5.34536	0.894024
TCGA_EE_A2GC	low	4.96626	5.30412	1.42744	0.308467	3.43837	2.85363	2.06303	2.12151	5.25526	0.838421
TCGA_FR_A7U8	high	5.25297	5.51046	1.47108	0.439851	3.5746	3.38449	1.97644	2.29923	5.45544	1.00523
TCGA_YD_A89C	high	5.10349	5.66175	0.715769	0.24587	2.74839	3.39989	2.69914	2.10093	5.56202	0.68254
TCGA_EE_A185	high	5.53688	5.64704	1.72183	0.449733	4.06554	3.06677	2.6632	2.39582	5.54255	1.22952
TCGA_FR_A44A	low	4.69136	5.14728	2.02322	0.43563	3.65628	2.70614	1.43315	2.13897	5.18966	0.769174
TCGA_D3_A51F	low	4.67548	4.84155	2.22044	0.306003	3.5805	2.47915	0.973366	2.02218	5.1467	0.669708
TCGA_EE_A3J8	high	5.33801	5.73325	1.16967	0.442434	2.3659	2.95074	2.95637	2.24809	5.46997	0.749476
TCGA_D3_A3C8	low	4.56165	4.80771	1.56139	0.2506	2.93647	2.44928	0.977599	2.01337	5.17415	0.594148
TCGA_EE_A2A0	low	5.04925	5.57971	1.73942	0.343465	2.69595	3.12846	1.44602	2.02161	5.36822	0.899972
TCGA_FR_A7U9	high	4.89089	5.27264	1.82331	0.275142	3.28929	3.28429	1.77697	1.92469	5.5486	0.869763
TCGA_D3_A5GT	high	5.57457	5.45936	2.6061	0.785385	3.70306	2.83458	0.749355	2.24811	5.20685	1.24203
TCGA_EE_A2A1	low	5.23709	5.32415	2.27864	0.206591	3.71676	2.85483	1.87503	2.03964	5.34922	0.850638
TCGA_EE_A2MU	low	5.21227	5.27461	1.8991	0.433409	3.23646	3.16959	2.10479	2.19184	5.37004	0.938603
TCGA_FS_A1ZJ	low	4.83666	5.30452	0.966943	0.258782	3.46917	3.25446	2.35138	2.08377	5.3408	0.659054
TCGA_EE_A29L	high	5.43433	5.69373	1.71674	0.481319	3.42758	3.2994	3.15631	2.37889	5.38999	0.948195
TCGA_FR_A8YE	low	4.73092	4.85977	1.59094	0.24054	3.79043	2.34223	1.13578	2.01638	5.07538	0.5193
TCGA_EB_A4OY	high	5.83296	5.42211	3.64891	0.606927	3.76567	3.0121	1.22163	2.2519	5.37719	1.4273
TCGA_D3_A2JA	low	5.01822	5.14647	1.68146	0.346403	2.85531	3.08093	1.90176	1.9883	5.35954	0.774584
TCGA_FW_A3TU	high	5.73158	5.48145	2.72109	0.74426	4.47616	3.39538	1.22019	2.33118	5.46945	1.38428
TCGA_BF_AAOU	high	5.67104	5.57133	2.34702	0.625438	3.75203	2.75699	1.41379	2.22462	5.48245	1.276
TCGA_FW_A5DX	low	5.25077	5.51469	2.03603	0.599548	3.46737	3.1089	2.56482	2.18156	5.35662	0.888486
TCGA_EB_A41B	high	5.26854	5.52123	1.68994	0.388213	4.04907	3.05194	2.294	2.38776	5.38276	0.923981
TCGA_EB_A44Q	low	4.81178	5.20051	1.79384	0.439416	3.59183	3.10792	1.56396	2.19361	5.2917	0.764162
TCGA_Z2_A8RT	low	5.08418	5.34647	1.78362	0.354743	3.48156	2.77205	2.29043	2.16097	5.31774	0.757291
TCGA_WE_AAA3	high	5.39572	5.6026	1.818	0.377451	3.84019	3.42878	2.01094	2.14624	5.48412	1.12038
TCGA_GN_A26A	low	5.53151	5.3196	2.19519	0.434715	3.43451	2.45333	2.39488	2.09413	5.56039	1.00888
TCGA_EB_A553	high	6.1588	5.56882	3.61568	0.998068	3.79936	2.90086	0.931141	2.29101	5.32011	1.43255
TCGA_EE_A2GK	low	3.78081	4.31861	1.40866	-0.0355137	3.45204	1.71945	0.171535	1.86543	4.91737	-0.0585599
TCGA_FR_A3R1	low	5.22257	5.38185	0.856912	0.436238	3.11004	2.79671	2.47288	2.18248	5.384	0.949107
TCGA_DA_A1IC	high	5.57393	5.68537	1.98314	0.439596	3.52575	3.12662	2.37886	2.22878	5.60023	1.10836
TCGA_EE_A3JB	low	5.02148	5.23291	1.65098	0.328736	2.80335	2.91298	2.32364	2.06032	5.44561	0.738331
TCGA_D9_A4Z6	high	5.22276	5.63632	2.1633	0.402149	3.93983	3.296	2.35827	2.27514	5.51679	1.04473
TCGA_EE_A184	low	5.43235	5.43583	2.06106	0.31095	4.01786	2.72683	2.53966	2.25941	5.33518	1.00791
TCGA_ER_A19K	high	5.27541	5.56585	1.68479	0.490829	3.50603	2.36605	1.69692	2.28534	5.47098	1.14091
TCGA_EE_A2GO	low	5.80999	5.57376	2.01364	0.485049	3.50488	2.83242	2.35196	2.21134	5.53175	1.14399
TCGA_D3_A1Q9	low	5.22203	5.54539	1.87828	0.521939	3.26082	2.74891	1.46526	2.33672	5.37542	1.06486
TCGA_BF_AAP0	low	5.00141	5.23656	2.90033	0.419788	3.51225	2.81853	1.25532	2.15197	5.37504	0.851257
TCGA_D3_A51J	low	5.01327	5.00722	2.40808	0.303609	3.43128	2.72436	1.57485	2.11071	5.17342	0.755573
TCGA_D3_A2JL	low	5.36101	5.4264	1.85053	0.491282	3.01435	2.49861	1.61691	2.279	5.41509	1.0739
TCGA_EE_A2GT	high	4.95774	5.27648	2.28418	0.234136	3.35266	3.16934	2.1079	2.09085	5.38674	0.756782
TCGA_EE_A3J3	low	4.98256	5.32126	1.40807	0.261404	3.44699	3.45772	1.75723	2.08753	5.31464	0.869211
TCGA_YD_A9TA	low	4.56193	5.2425	1.58626	0.370654	3.08248	3.18324	1.94189	2.02547	5.47081	0.484114
TCGA_EE_A29X	high	5.53196	5.34777	2.61538	0.531977	3.52641	2.96411	2.5834	2.22001	5.43449	1.00928
TCGA_EE_A2MG	low	4.80176	5.20006	1.77161	0.203712	3.48139	2.97761	1.73185	1.99936	5.2507	0.623661
TCGA_EE_A17Z	high	4.74049	5.59596	0.766807	0.223099	3.05393	3.4739	2.32217	2.12166	5.41354	0.820537
TCGA_WE_A8ZR	high	5.05076	5.46296	2.22528	0.398281	4.11459	3.61142	2.38892	2.26206	5.25054	0.872507
TCGA_GN_A4U4	high	5.29993	5.45137	0.992989	0.302131	3.11034	2.67217	2.18336	2.22868	5.25179	0.887082
TCGA_D3_A3CB	low	5.16705	5.09296	2.1438	0.350174	3.50292	2.21984	1.50362	2.04495	5.21977	0.783268
TCGA_EE_A2MS	low	5.12261	5.46298	2.17504	0.399075	3.78773	3.50887	2.29016	2.20703	5.39956	0.79815
TCGA_W3_A824	low	5.11701	5.15707	1.43009	0.247469	3.08947	2.3875	1.76815	2.14161	5.31207	0.924089
TCGA_EB_A42Y	low	5.28508	5.3983	1.18106	0.39498	3.16852	3.12223	2.46142	2.12017	5.45079	0.963867
TCGA_GN_A4U9	high	4.66986	5.21092	1.197	0.272541	2.82653	3.03613	1.96288	2.01537	5.37571	0.349614
TCGA_BF_A5ES	high	5.72157	5.66628	2.49492	0.513164	3.93099	3.22999	2.43471	2.24743	5.60681	1.39248
TCGA_EB_A4XL	high	5.21537	5.50468	1.6919	0.523034	3.23321	2.32871	1.35024	2.20909	5.37872	0.973295
TCGA_OD_A75X	low	4.89656	5.34852	0.714631	0.44571	3.31829	3.74158	2.43972	2.22086	5.3698	0.746879
TCGA_ER_A19W	low	4.14527	5.01459	1.01861	0.188372	3.23222	2.8578	1.63903	2.07446	5.10528	0.486034
TCGA_DA_A1HW	low	4.83197	5.3166	1.95868	0.453993	3.44909	3.07463	1.76762	2.17711	5.27151	0.715358
TCGA_D3_A8GE	low	5.35302	5.37925	1.49379	0.16367	3.45133	3.10499	2.00376	1.86914	5.56817	0.960119
TCGA_EE_A2GI	low	5.16037	5.34447	1.88159	0.455888	3.19622	2.96241	2.25087	2.21611	5.45582	0.808644
TCGA_D3_A1Q4	high	5.33727	5.41689	2.17491	0.153232	3.69941	2.83494	1.59155	1.95178	5.44175	1.00676
TCGA_EE_A2MH	low	5.31818	5.3014	2.75625	0.335737	3.94743	3.14214	1.95132	2.16339	5.32151	0.885919
TCGA_BF_AAP8	high	5.32934	5.35651	1.99061	0.259348	3.68089	2.55593	0.677518	2.16869	5.27069	1.02496
TCGA_W3_AA21	high	5.85644	5.52778	2.44818	0.474572	3.40746	3.18871	2.02395	2.24833	5.56434	1.23634
TCGA_3N_A9WC	low	4.91235	5.04102	1.62836	0.30485	3.57676	3.05646	2.18114	2.10373	5.20696	0.833848
TCGA_EE_A2ME	low	4.59687	4.93429	1.55559	0.216087	3.57432	2.23861	0.992128	1.9473	5.0959	0.543573
TCGA_W3_AA1Q	high	5.39229	5.49752	1.64809	0.39001	3.07141	2.72756	2.04427	2.18871	5.24669	1.05285
TCGA_ER_A2NG	low	5.19735	5.36808	1.82865	0.415533	4.00047	2.89725	2.35919	2.21837	5.40202	0.903858
TCGA_FS_A1Z0	low	4.32497	5.16029	0.383768	0.194647	2.87915	2.94541	1.86559	2.00164	5.18756	0.449421
TCGA_DA_A1IA	high	5.92279	5.61752	2.76735	0.628354	4.09394	3.38073	2.9958	2.37578	5.62728	1.41181
TCGA_D3_A2JO	low	4.79073	5.28503	1.47462	0.395904	3.44458	2.72803	2.08801	2.21867	5.25089	0.693205
TCGA_FS_A4F0	low	4.78617	5.17345	0.547332	0.150238	2.85698	2.3777	2.83436	2.20156	5.24364	0.6917
TCGA_FW_A3TV	low	5.35292	5.43253	2.25537	0.373986	4.39565	2.53434	1.89523	2.27401	5.43785	1.10195
TCGA_FS_A1Z4	low	4.47017	4.90191	1.70335	0.154915	3.29566	2.7645	1.49705	1.97097	5.1285	0.327436
TCGA_WE_A8ZN	high	5.73003	5.38293	3.35252	0.657844	3.72842	2.90171	1.02513	2.20188	5.40448	1.28241
TCGA_D9_A6EA	low	5.48451	5.36539	1.85752	0.394737	3.38165	3.11993	2.82253	2.2222	5.35511	1.05616
TCGA_EB_A1NK	high	5.8523	5.67543	2.86618	0.554177	3.82363	2.2982	1.58367	2.25767	5.57995	1.42096
TCGA_D3_A1Q1	low	5.20037	5.40445	1.61525	0.173893	3.15858	2.8106	2.22815	2.17033	5.37845	0.883957
TCGA_GF_A2C7	high	5.28867	5.77699	1.75811	0.349678	3.52571	3.09128	1.97674	2.18666	5.55291	1.12033
TCGA_BF_A1Q0	low	5.22577	5.42167	1.64224	0.310626	3.81485	3.1087	2.13836	2.11285	5.4665	0.989988
TCGA_EE_A3J7	low	5.49851	5.3224	1.55371	0.257529	3.1093	2.68183	2.52028	2.16567	5.36292	0.88197
TCGA_D3_A5GO	low	5.31101	5.24451	2.33877	0.457135	2.90385	3.1563	2.20899	2.17059	5.41261	1.15712
TCGA_FR_A2OS	high	4.80015	5.50728	1.49911	0.170405	3.58525	3.1978	2.32127	2.14955	5.37672	0.878207
TCGA_IH_A3EA	high	5.81394	5.54136	2.41088	0.510758	3.41334	2.98256	2.34439	2.31821	5.53982	1.31197
TCGA_EB_A3HV	high	5.80714	5.65662	2.90907	0.66061	3.73415	2.67127	1.28057	2.24208	5.60143	1.38996
TCGA_D3_A2JP	high	5.58922	5.3891	2.89216	0.308564	3.13506	2.85306	1.33511	2.09588	5.3754	1.1272
TCGA_GN_A264	high	5.28968	5.63606	1.30887	0.200999	3.6373	3.02569	2.63383	2.04078	5.50983	0.926076
TCGA_EB_A44O	low	5.40713	5.62046	1.14252	0.440009	4.10985	2.6562	2.8219	2.34722	5.5316	0.973999
TCGA_GN_A4U8	low	4.74256	5.09627	1.37928	0.279054	2.84064	2.77044	1.28968	2.15229	5.16903	0.697279
TCGA_EE_A2MC	low	4.86404	4.97695	1.33357	0.206482	3.12533	1.88518	1.58036	2.00615	5.3563	0.658651
TCGA_D9_A3Z4	low	4.70362	5.21833	0.812878	0.238203	3.22461	2.41224	1.91084	2.03672	5.18028	0.742831
TCGA_D3_A2JG	high	5.57618	5.70547	2.59157	0.555402	3.53659	3.4554	1.90882	2.2731	5.47812	1.18373
TCGA_D3_A51R	high	4.80539	5.50513	0.480242	0.24015	2.1795	2.81882	2.32496	2.01425	5.51491	0.474145
TCGA_EB_A3Y6	high	5.46838	5.7438	1.49369	0.471261	4.11363	3.15273	2.28039	2.21185	5.54677	1.17329
TCGA_GF_A3OT	high	5.54854	5.49488	1.64946	0.207798	2.59034	2.43486	2.51437	1.93768	5.8002	1.07573
TCGA_FS_A1ZT	low	4.48643	5.30041	1.24823	0.225621	3.09606	2.58799	1.90423	2.05343	5.20134	0.548899
TCGA_FS_A1ZG	high	5.53514	5.7099	1.8152	0.256048	3.79888	3.48582	3.06309	2.26341	5.50682	1.06882
TCGA_DA_A1I1	low	5.16898	5.35614	2.00966	0.178533	3.30862	3.08784	2.38074	2.01706	5.36997	0.967404
TCGA_D3_A2JK	high	5.74772	5.42611	3.42785	0.616917	3.55194	2.9455	1.48526	2.2635	5.51897	1.41027
TCGA_EB_A97M	low	5.56901	5.46227	2.87851	0.555098	3.52822	3.25627	1.96175	2.27371	5.41562	1.25415
TCGA_EE_A183	high	5.27654	5.30063	2.29397	0.403453	4.21831	2.92656	2.18217	2.18574	5.40535	0.92777
TCGA_D9_A149	low	4.91327	5.35531	1.63246	0.185867	3.51543	3.02021	2.54761	2.15421	5.431	0.797371
TCGA_FS_A1ZR	low	5.16267	5.53315	1.9051	0.267025	3.48768	3.11715	2.16586	2.11737	5.46104	0.941884
TCGA_D3_A2JF	low	5.36847	5.0996	1.49325	0.428765	3.57706	2.93977	1.68088	2.10857	5.24593	0.992144
TCGA_RP_A693	low	4.96008	5.18228	1.7456	0.288566	3.82501	2.96687	1.83265	2.09261	5.22597	0.821346
TCGA_FR_A3YN	low	5.31948	5.48653	1.5237	0.456592	3.57831	2.70748	2.28055	2.26361	5.33095	1.0678
TCGA_EE_A20H	high	4.92394	5.38955	1.27579	0.511519	3.39265	3.19128	2.22057	2.26572	5.60495	0.798169
TCGA_FS_A1ZE	high	5.38987	5.57778	1.49114	0.321049	3.70919	2.75144	2.43236	2.20762	5.32514	0.987358
TCGA_EE_A29B	high	5.07078	5.36698	1.25514	0.330787	3.26702	3.12421	2.2761	2.23381	5.3478	0.921672
TCGA_GN_A268	high	5.19842	5.44178	1.53022	0.325687	3.03509	2.5533	2.83602	2.29579	5.33308	0.808978
TCGA_Z2_AA3S	low	4.36908	5.18697	1.13329	0.151976	3.30807	2.85324	1.8111	2.14991	5.23412	0.560808
TCGA_GN_A4U3	low	5.22232	5.30713	2.00598	0.462617	3.00739	2.6975	2.17667	2.30735	5.34771	0.895341
TCGA_BF_A1PZ	low	5.46944	5.54436	2.04686	0.419129	3.55058	3.05025	2.71762	2.36245	5.48233	1.1611
TCGA_3N_A9WD	low	5.45338	5.41627	2.59225	0.61059	4.05439	3.72854	1.24839	2.22887	5.39845	1.03997
TCGA_FR_A8YC	high	5.26001	5.20653	1.2725	0.329415	3.44371	2.60462	2.15665	2.19058	5.2017	0.820783
TCGA_D3_A2J7	low	5.67474	5.47203	2.20756	0.379731	3.3173	2.97798	2.05096	2.19318	5.45917	1.13403
TCGA_HR_A2OH	low	4.41949	4.90054	1.98302	0.27483	3.26401	2.67689	1.31596	2.09161	5.12906	0.607449
TCGA_EE_A2MK	low	5.29766	5.43967	1.19798	0.206966	3.04262	3.21696	2.04055	2.02666	5.49776	1.00062
TCGA_EB_A6R0	low	4.56741	5.0765	0.563632	0.32917	3.32272	2.86004	2.17721	2.16375	5.18444	0.688299
TCGA_D3_A5GR	low	5.39747	5.32576	1.95956	0.417057	3.7213	2.94465	2.01015	2.04606	5.35622	0.83357
TCGA_FS_A1ZK	high	5.37705	5.51326	1.86254	0.152095	4.02549	3.50198	2.91955	2.22787	5.41737	1.02098
TCGA_EB_A3XF	low	5.07063	5.48006	1.51996	0.381362	2.76417	2.82703	1.93349	2.16971	5.4805	1.02613
TCGA_EE_A2MN	low	5.19363	5.37159	1.27173	0.196758	3.3457	2.57942	2.43585	2.08868	5.26332	0.901196
TCGA_EE_A2A6	low	5.12826	5.1342	1.95372	0.332919	3.53774	2.66113	2.05657	2.20902	5.19027	0.800336
TCGA_ER_A42L	low	5.1636	5.33613	2.62213	0.416649	3.69077	3.04409	1.5649	2.16504	5.44067	0.903999
TCGA_WE_A8K6	low	5.77326	5.48716	2.2719	0.494145	3.87497	2.63088	2.21485	2.19289	5.53872	1.23306
TCGA_FS_A4F4	high	5.51397	5.51356	2.79931	0.52932	3.89739	2.9526	1.80559	2.1244	5.45714	1.27206
TCGA_D3_A5GU	high	4.73998	5.21434	1.13699	0.315967	3.13797	2.5866	1.47909	2.10086	5.16235	0.74948
TCGA_ER_A19D	high	4.49299	5.29876	1.14957	0.0948422	3.08087	3.27689	2.1037	1.84382	5.39258	0.531372
TCGA_DA_A95Z	high	5.5867	5.48993	2.21563	0.385948	3.22014	3.19045	2.14019	2.22273	5.51598	1.04864
TCGA_EB_A5UL	low	5.09955	5.26561	2.26494	0.546549	3.93466	2.84355	2.09624	2.26247	5.2955	0.754091
TCGA_D3_A3MU	high	5.76965	5.59739	2.28017	0.398788	3.82459	3.11587	2.35142	2.1022	5.54065	1.26731
TCGA_GF_A6C8	low	4.99642	5.28671	1.36045	0.238122	2.94595	3.51591	2.1334	2.16929	5.40165	0.829743
TCGA_WE_AA9Y	high	5.70398	5.61931	2.65829	0.422872	4.6156	3.10357	1.73455	2.12457	5.60464	1.14147
TCGA_EE_A2MI	low	5.11543	5.21123	2.01464	0.277998	3.48668	2.94999	2.04065	2.05457	5.32557	0.994526
TCGA_D3_A3CC	high	5.40522	5.53736	1.91669	0.353533	3.53348	2.7276	2.09039	2.21031	5.39005	1.10372
TCGA_BF_A9VF	high	5.77747	5.76204	3.96768	0.622084	3.90142	2.66053	2.16071	2.41483	5.62491	1.2733
TCGA_D3_A8GV	high	5.47598	5.60329	1.37693	0.444538	3.18048	3.4699	2.71219	2.29813	5.61115	1.08034
TCGA_D3_A51E	low	4.85956	5.30746	1.94705	0.45576	3.50007	2.90004	1.73746	2.23215	5.27416	0.872727
TCGA_EB_A551	low	5.28683	5.21475	2.00025	0.408492	3.79571	2.384	2.08465	2.13992	5.24786	0.858078
TCGA_FR_A728	low	5.43393	5.30448	1.96301	0.451763	4.12785	2.58144	1.87609	2.191	5.32171	1.12156
TCGA_GN_A263	high	5.61449	5.83368	2.37842	0.567389	3.04286	2.77938	1.78898	2.2748	5.46211	1.29474
TCGA_ER_A19E	high	4.88989	5.53168	1.70404	0.341207	2.94039	3.24545	2.10108	2.06753	5.4765	0.715657
TCGA_DA_A95V	high	5.72098	5.59067	3.25286	0.516615	4.35046	2.98368	1.73435	2.27748	5.5273	1.30745
TCGA_D3_A3ML	high	5.80857	5.64811	1.19138	0.467067	3.71848	3.61924	2.99591	2.25667	5.43221	1.10119
TCGA_ER_A2NE	high	5.45449	5.66618	0.786779	0.499522	3.42612	2.82257	3.03844	2.3311	5.51812	1.00741
TCGA_W3_AA1R	low	5.24745	5.36397	1.45442	0.568955	3.50839	3.11603	2.5086	2.4051	5.39708	0.905303
TCGA_ER_A3ET	low	5.27506	5.5321	2.0187	0.267065	3.8266	3.7008	2.19767	2.03632	5.59041	0.960514
TCGA_EB_A82B	low	5.40028	5.47713	2.99812	0.542073	3.54649	3.32296	1.76964	2.21837	5.36778	1.10166
TCGA_EB_A85J	low	4.62231	5.21627	1.36317	0.143764	3.14279	2.73854	1.60467	2.11429	5.26293	0.742316
TCGA_EE_A182	high	6.02958	5.57124	3.48413	0.677561	4.55254	2.88261	1.78805	2.29312	5.64096	1.5369
TCGA_ER_A3EV	high	5.31034	5.64556	1.67881	0.429124	3.79955	3.7229	2.59783	2.19672	5.53232	1.05948
TCGA_ER_A1A1	low	3.84929	4.46956	1.79233	0.0499178	3.78271	1.97452	0.523376	1.93797	4.93386	0.0269436
TCGA_ER_A2NC	high	4.85148	5.2759	1.2053	0.16197	3.04111	3.11728	2.21921	1.88252	5.42272	0.78744
TCGA_ER_A42K	high	5.59252	5.32838	1.84449	0.339548	3.33583	3.15495	2.68751	2.13444	5.40575	1.04373
TCGA_DA_A1I4	high	5.4569	5.70299	2.64505	0.312442	3.1654	3.40706	1.82049	2.111	5.58921	1.17368
TCGA_FS_A4FC	low	5.47171	5.50258	1.51885	0.339795	3.70825	2.79602	2.24648	2.24388	5.50466	1.09677
TCGA_D3_A8GL	low	5.24753	5.47483	0.925812	0.247096	3.65969	3.00168	2.99036	2.28267	5.39965	0.833827
TCGA_FS_A1ZS	high	5.57239	5.50924	1.98734	0.32943	2.61616	2.49431	2.56357	2.01003	5.63227	1.02011
TCGA_D3_A1Q5	high	5.00644	5.30155	0.996726	0.280372	3.13122	2.45979	2.20234	2.0736	5.44163	0.819868
TCGA_EE_A29M	low	4.94109	5.56876	1.061	0.396455	3.50697	3.19433	2.45891	2.29076	5.47399	0.72664
TCGA_EB_A82C	high	5.27581	5.5804	1.32839	0.511118	3.00488	2.97241	2.27359	2.27083	5.53591	1.12905
TCGA_EE_A29T	low	5.72384	5.49023	1.76164	0.498305	3.33588	3.21854	2.27577	2.16121	5.43044	1.032
TCGA_EE_A2GN	high	5.14935	5.49474	1.36287	0.212629	3.51987	3.07953	2.36765	2.06208	5.44572	0.919418
TCGA_EB_A3Y7	high	5.96293	5.78979	3.19682	0.536137	4.05137	3.30558	2.21463	2.29716	5.68543	1.45611
TCGA_EE_A3J5	low	5.36407	5.55638	2.14884	0.358621	3.60407	2.79049	2.41244	2.17664	5.47178	0.981858
TCGA_EB_A5SH	high	5.48912	5.61632	2.49134	0.400594	3.74044	3.12966	2.35252	2.13656	5.5485	1.14164
TCGA_EE_A2GJ	low	4.91406	5.22399	1.88648	0.284104	3.04737	3.11224	2.28091	2.17981	5.30805	0.893378
TCGA_W3_AA1O	high	5.38427	5.60989	1.48019	0.481509	3.50583	3.13497	2.38501	2.32696	5.48766	1.02657
TCGA_WE_A8ZM	high	5.24468	5.46062	1.26632	0.325105	4.16665	2.09693	1.96646	2.11738	5.41246	0.944736
TCGA_ER_A3PL	low	5.15983	5.47142	1.14599	0.202019	3.3497	2.89985	2.27799	2.0648	5.41347	0.954646
TCGA_DA_A3F3	high	4.84251	5.37729	1.13133	0.251077	3.10695	3.38217	2.36297	2.14113	5.28765	0.767967
TCGA_EE_A2GB	low	5.11873	5.29473	1.87598	0.338002	3.82373	2.87247	2.41903	2.31417	5.37096	0.897645
TCGA_EE_A2M8	low	4.62093	5.03653	2.32392	0.21082	3.37964	2.56937	1.06756	2.01544	5.16573	0.658059
TCGA_EB_A5SG	low	4.9584	5.18147	1.83662	0.416277	3.3327	2.43653	1.16469	2.12321	5.2165	0.843506
TCGA_D3_A1QB	low	4.75382	5.24931	1.52652	0.251546	3.45736	2.95553	1.59572	2.07198	5.28743	0.862445
TCGA_EE_A3JE	low	4.84005	5.14011	1.82893	0.243779	3.15762	2.88468	1.33192	1.98055	5.23878	0.819672
TCGA_WE_A8JZ	high	5.30795	5.46323	1.65279	0.306391	3.97262	3.11025	2.5294	2.21784	5.36042	0.963197
TCGA_GN_A9SD	low	4.97763	5.3682	1.7603	0.273289	3.65992	3.04848	1.53452	2.13658	5.38102	0.778451
TCGA_FS_A4F2	high	5.20287	5.37854	2.21252	0.388485	3.16878	2.41743	2.08505	2.15948	5.47346	0.909167
TCGA_EE_A2GH	low	4.98827	5.22895	2.16981	0.418246	3.09122	2.55535	0.569022	2.08142	5.2696	0.951708
TCGA_BF_AAP7	low	5.42762	5.34594	2.6371	0.473136	3.46308	2.87588	1.34164	2.19145	5.41181	1.195
TCGA_D9_A3Z3	low	5.38408	5.49539	2.76055	0.534471	4.18086	3.04527	1.98876	2.24333	5.4727	1.08
TCGA_D3_A51T	low	5.04429	5.28764	1.55611	0.305845	3.40197	3.28004	2.35132	2.20917	5.40194	0.910379
TCGA_EE_A2M6	high	4.73444	5.29111	1.75005	0.292006	2.2789	2.99719	2.29243	2.2062	5.34961	0.453997
TCGA_WE_AAA0	low	5.22075	5.28906	0.932137	0.326587	3.58204	2.89532	2.44254	2.22606	5.29906	0.949233
TCGA_FS_A4FD	high	4.80904	5.31987	1.2885	0.267909	3.2785	2.9241	2.2376	2.00135	5.21009	0.662528
TCGA_DA_A960	high	5.93666	5.49676	3.39105	0.808034	3.56582	2.89997	1.19717	2.34007	5.2478	1.42676
TCGA_EE_A3AA	low	5.29605	5.30414	2.38647	0.335219	3.48594	3.20105	2.07552	2.12996	5.35277	0.790069
TCGA_D3_A1Q8	low	5.31127	5.51472	2.25405	0.298125	3.26046	2.95241	2.41842	2.02444	5.50531	1.03824
TCGA_EE_A3AB	low	5.54444	5.23739	1.67858	0.390057	2.94742	2.28157	1.96953	2.04797	5.44054	0.91796
TCGA_BF_AAP6	high	5.19611	5.33812	2.4535	0.405209	3.29124	2.85821	2.2678	2.24893	5.37838	0.935154
TCGA_EE_A3AF	high	5.12659	5.4073	1.7776	0.277621	3.6184	2.80095	2.23192	2.22011	5.49156	0.997044
TCGA_FS_A1ZY	high	5.31232	5.55356	1.69236	0.298459	2.88443	3.08032	2.21839	2.23765	5.36679	1.04687
TCGA_EE_A17Y	high	5.33117	5.36072	2.09816	0.297872	3.02087	2.04115	2.0169	2.16664	5.45733	1.08309
TCGA_D3_A3C6	low	4.93646	5.4383	0.711532	0.205332	2.82231	3.43609	2.02326	2.11661	5.47893	0.938765
TCGA_ER_A19Q	low	5.15299	5.39136	2.86129	0.353081	3.40407	3.02231	2.07753	2.1954	5.41803	0.980058
TCGA_D3_A2J8	low	5.28169	5.08524	1.12716	0.259231	3.35286	2.65905	2.34844	2.03277	5.47966	0.780672
TCGA_ER_A19P	low	4.46921	4.80407	1.68962	0.24026	3.60976	2.34129	1.0445	1.97632	5.08202	0.470809
TCGA_W3_AA1W	low	4.51317	4.85146	0.917287	0.227861	3.60319	2.06329	1.4892	2.0983	5.12724	0.542711
TCGA_FS_A1Z7	high	5.45048	5.60177	2.73544	0.35983	3.87286	3.37412	1.98081	2.07368	5.50148	1.0968
TCGA_D9_A1JX	low	4.92521	5.25216	1.22796	0.323876	3.04323	2.91092	2.14351	2.12	5.32988	0.806603
TCGA_XV_AAZV	low	5.68829	5.41403	2.9809	0.678956	3.62422	2.1728	0.620128	2.20413	5.5579	1.2322
TCGA_DA_A1HV	low	4.96057	5.09393	1.43764	0.326781	3.4322	2.56027	1.82061	2.16135	5.31712	0.871263
TCGA_D3_A2JH	low	4.40337	4.98003	0.664511	0.19081	3.07467	2.76247	1.71151	2.10589	5.12865	0.525866
TCGA_EE_A2MM	high	4.65592	5.16247	0.781924	0.31024	3.03859	3.19141	2.30735	2.11711	5.2391	0.679871
TCGA_D3_A3CE	low	4.75123	5.24799	1.63474	0.324628	3.0233	2.76897	1.74766	2.08083	5.27145	0.643405
TCGA_EB_A6QZ	low	5.39445	5.5856	2.20975	0.396286	3.54291	3.44884	2.33401	2.27724	5.47619	1.09866
TCGA_EE_A2ML	low	5.20311	5.30159	1.47883	0.1761	3.24778	2.39757	2.60239	2.23805	5.33136	0.911903
TCGA_FS_A1ZP	high	4.97657	5.70451	0.826565	0.171327	3.1538	3.52679	2.17464	2.0001	5.43806	0.873833
TCGA_EE_A29H	high	5.27652	5.49567	2.22942	0.512995	3.70791	3.16838	2.57679	2.2666	5.38655	1.00454
TCGA_HR_A5NC	high	5.36416	5.66155	2.16786	0.468575	3.60008	2.93145	1.5576	2.2375	5.56693	1.24482
TCGA_FS_A1Z3	high	4.86241	5.37425	0.822777	0.375181	3.37226	2.9106	2.23816	2.28441	5.27199	0.747669
TCGA_EE_A2MR	low	4.28499	4.82589	1.81902	0.167014	3.11685	2.15357	1.63206	1.93275	5.16357	0.399781
TCGA_FS_A1ZC	high	4.65387	5.2199	1.45679	0.153349	2.82082	2.40042	2.14578	2.13794	5.30441	0.593857
TCGA_EB_A42Z	low	5.62264	5.56568	1.7093	0.504265	3.4644	3.07248	2.35627	2.19438	5.5042	1.26626
TCGA_FR_A726	high	5.15853	5.58235	1.71312	0.446001	3.49371	2.6956	2.26504	2.19568	5.4337	0.972271
TCGA_EB_A5KH	high	5.68787	5.66324	2.49236	0.435682	3.6414	3.16958	2.11891	2.14553	5.53683	1.26423
TCGA_FS_A1YW	low	5.40602	5.40586	1.37019	0.231451	3.70731	2.82911	2.07665	2.14115	5.35471	0.967717
TCGA_FS_A1ZB	high	5.34556	5.48515	2.58264	0.473543	3.2564	2.54324	1.55097	2.17394	5.47905	1.08532
TCGA_GN_A8LL	high	5.65265	5.61244	3.76175	0.493022	4.08158	3.75458	2.18239	2.25612	5.57758	1.3611
TCGA_EE_A29A	high	5.5873	5.38593	1.44801	0.450105	3.55258	2.75255	2.10431	2.12808	5.39098	1.04567
TCGA_EE_A2A2	low	4.65541	5.27957	1.18992	0.207304	2.7767	2.75586	2.46353	2.19049	5.26619	0.57794
TCGA_EB_A4OZ	high	5.65483	5.17038	3.09459	0.811752	3.52132	1.98327	-0.0917238	2.23308	5.31217	1.3591
TCGA_EE_A2MF	low	4.68358	5.21905	1.28008	0.260791	3.01397	3.44375	2.2118	2.20748	5.33475	0.821652
TCGA_ER_A198	low	4.97339	5.35417	1.09654	0.268814	3.06694	2.75408	2.51681	2.19313	5.27035	0.75739
TCGA_XV_AB01	high	5.68686	5.50606	3.6124	0.544708	3.83038	2.69798	1.30842	2.16625	5.47187	1.29218
TCGA_EE_A2GP	low	5.14402	5.41457	1.49521	0.257889	3.33535	3.36224	2.44579	2.05406	5.38836	0.727245
TCGA_EE_A3AG	high	4.71765	5.29263	1.54211	0.393995	2.98061	2.02539	2.13097	2.26462	5.37896	0.760473
TCGA_EB_A24D	high	5.19389	5.49971	1.63807	0.265347	3.74207	2.61716	2.29451	2.10688	5.34358	0.924961
TCGA_XV_AAZY	high	5.69531	5.48539	3.13725	0.589435	3.87781	2.64794	1.68598	2.3194	5.47335	1.38623
TCGA_DA_A1I5	low	5.1381	5.42459	2.46277	0.450585	3.30368	2.96953	1.47855	2.13477	5.44093	0.965221
TCGA_EE_A2M7	low	5.08402	5.25053	0.829165	0.0166032	3.00131	2.6709	2.21482	1.96299	5.35194	0.7679
TCGA_DA_A1HY	low	5.85647	5.39629	2.27161	0.401916	3.78947	2.86605	2.70322	2.09042	5.57789	1.18045
TCGA_ER_A19G	low	4.79524	5.13804	1.09795	0.327941	3.03056	2.99747	2.34718	2.11584	5.18071	0.63739
TCGA_D3_A2J6	low	5.68024	5.66996	2.16221	0.496186	4.23308	3.28963	2.77171	2.23645	5.48725	1.19761
TCGA_DA_A1I2	low	5.24968	5.42895	1.12476	0.332092	3.18817	3.46748	2.18453	2.07655	5.46138	0.938839
TCGA_D3_A8GJ	low	4.7026	4.98217	1.19099	0.293501	3.10039	2.62589	1.2104	2.06983	5.15896	0.784241
TCGA_GN_A262	high	5.15728	5.33529	1.44716	0.549903	2.59861	2.57487	1.62387	2.29645	5.36202	0.949863
TCGA_FS_A1ZN	high	5.43629	5.60636	1.16219	0.349967	3.13963	3.07912	2.19874	2.24035	5.48075	1.08784
TCGA_DA_A95W	low	4.95048	5.11995	1.49178	0.312322	3.28861	2.54042	1.23753	2.10446	5.28456	0.838794
TCGA_EB_A5SF	high	6.55239	5.91224	4.15804	0.967991	4.67712	2.61843	0.981558	2.33944	5.80817	1.79269

## Sheet: S8
The distribution of prognostic gene in TME cell subsets
Target	TME cell subsets
CXCL12	Mono/Macro
PLAU	Mono/Macro*, DC
LAP3	CD4/CD8 T cells*, Mono/Macro*, DC*, B cells*, Tprolif, Fibroblasts, Plasma cells
PIM1	CD8 T cells*, Fibroblasts*, Mono/Macro*, DC*, B cells*, CD4 T cells, Tprolif, Plasma cells
PTK2B	CD8 T cells, Fibroblasts, Mono/Macro, DC, B cells, CD4 T cells, Tprolif, Plasma cells
CCL8	Mono/Macro*, CD4/CD8 T cells, Plasma cells
