# Supplementary material for: Exploring Medicinal Mechanism of Baicalin in Tumor Microenvironment of Melanoma via Bioinformatic and In Vitro Study
Source: Research Square preprint supplement (doi:10.21203/rs.3.rs-7498099/v1), 2025-10-31
Supplement: Supplementary file 2 [file 51c936cf8f68e5314cd6a29a.docx]

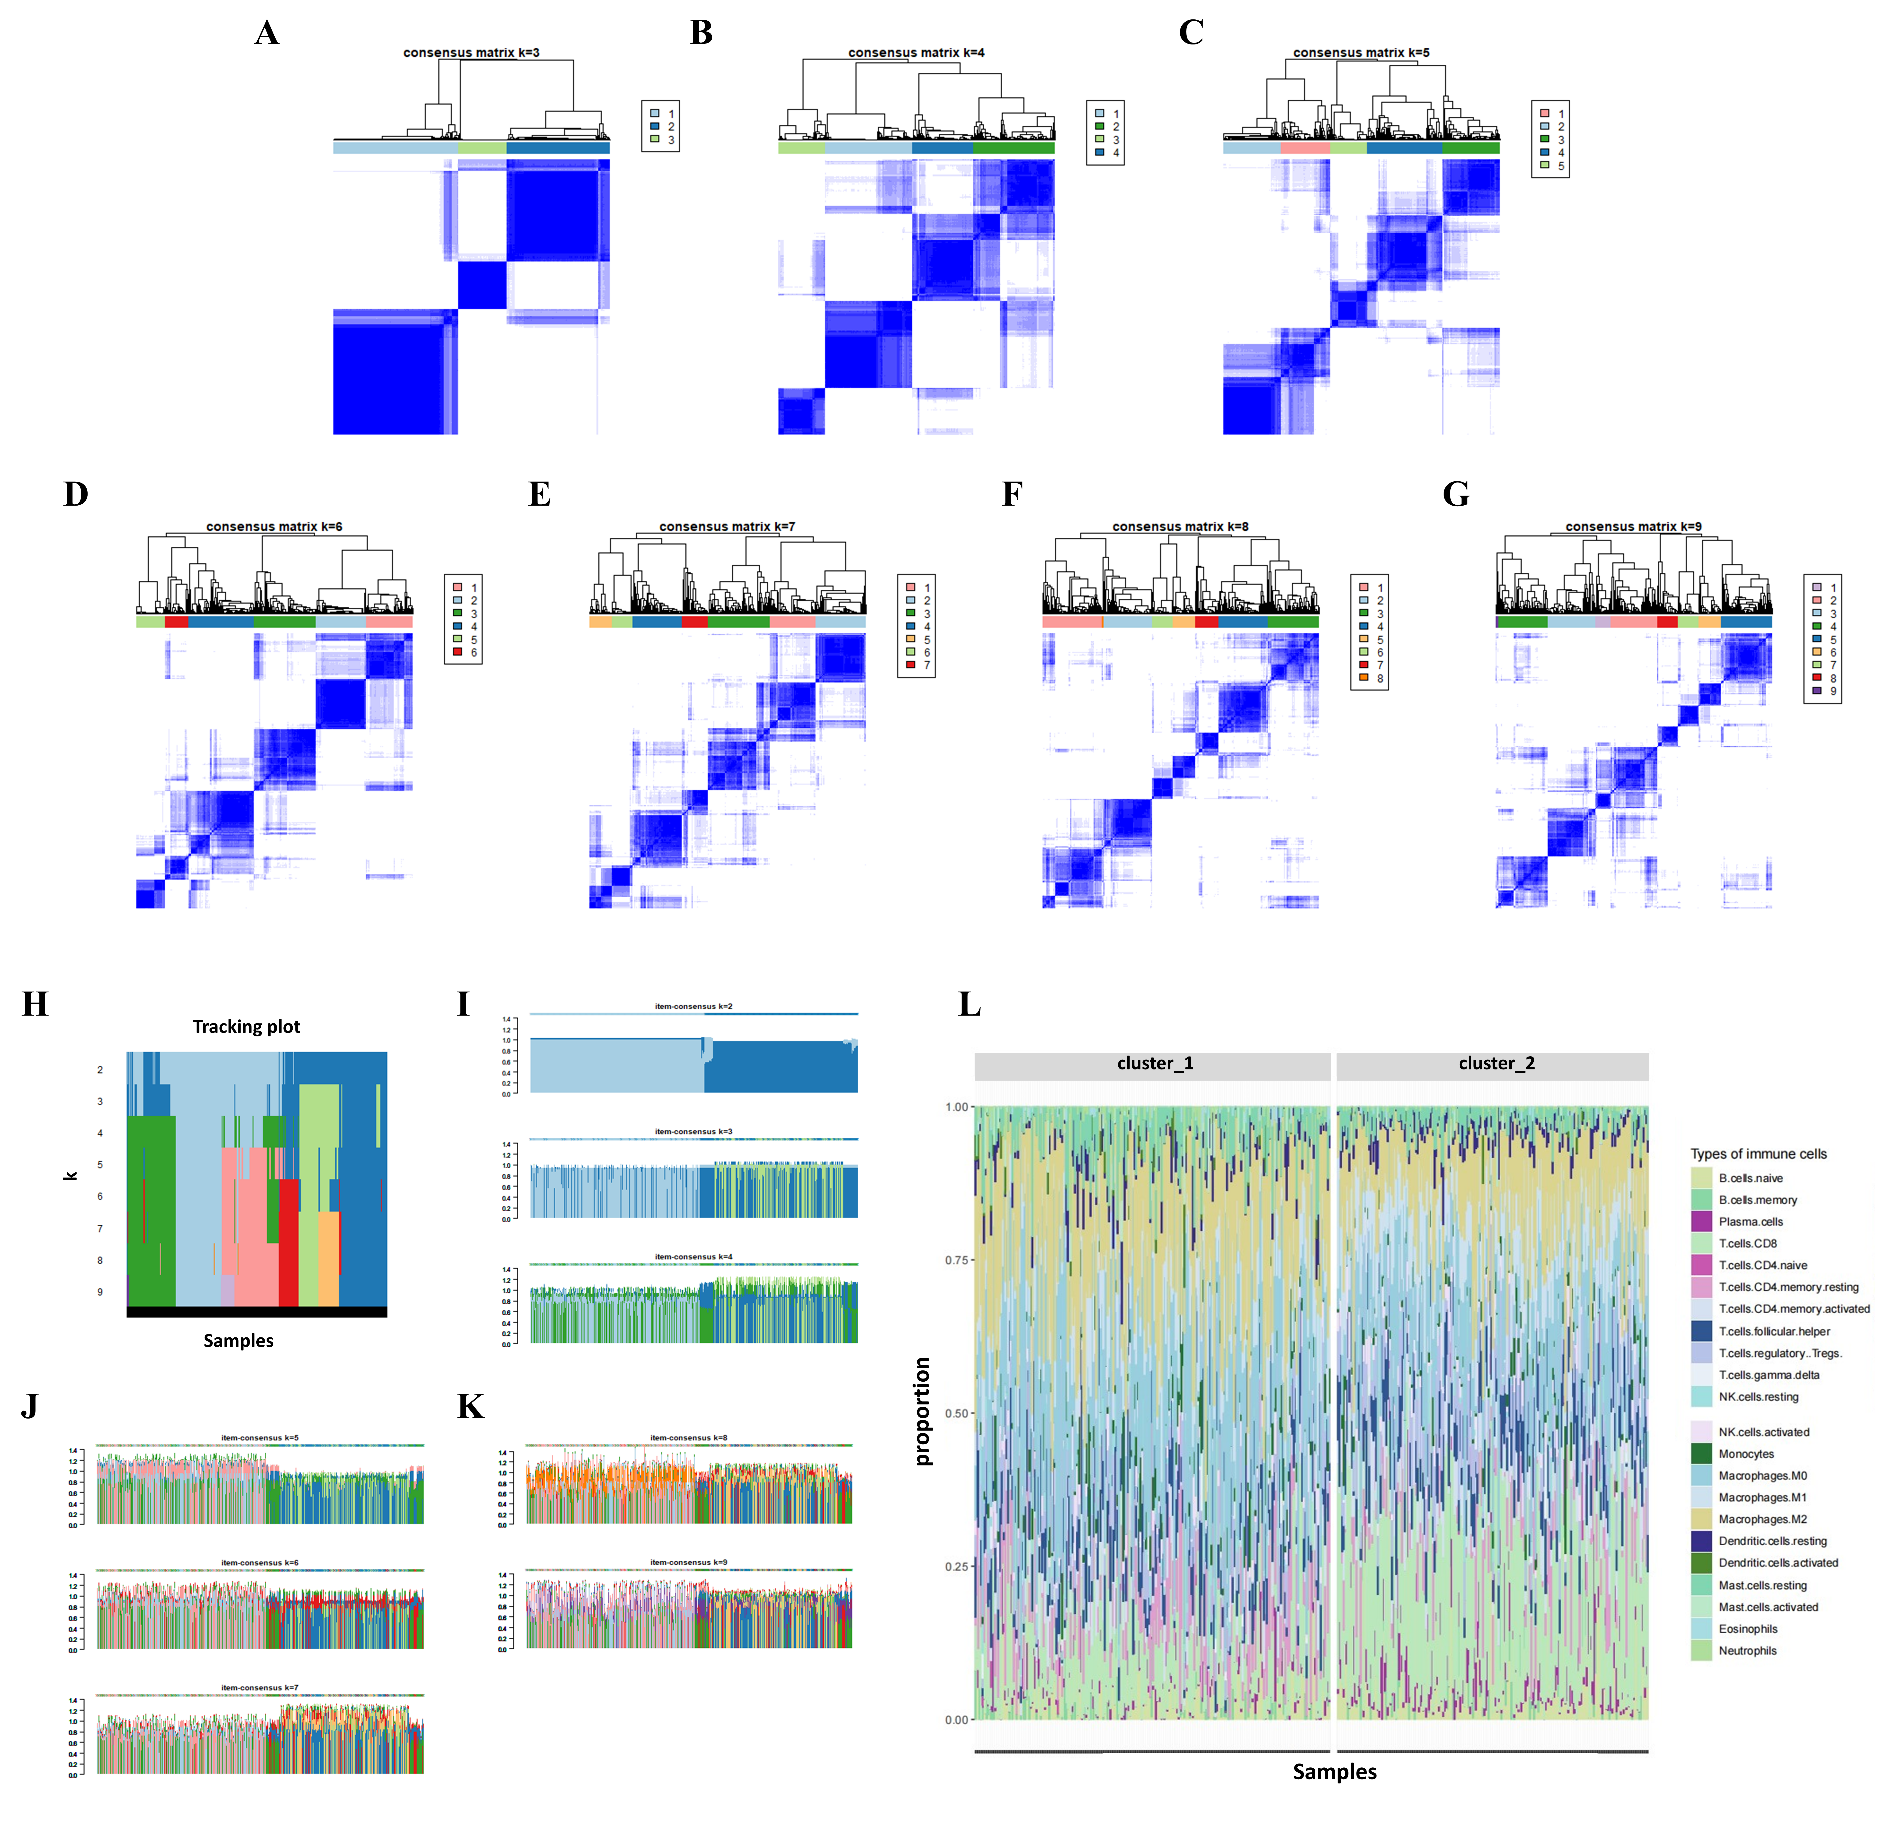


**Fig. S1.** Consensus clustering for immune-infiltrating immune cells.

**(A-G)** Consensus matrices (k = 3-9) of the SKCM cohort. **(H-K)** Tracking plot (k = 2-9) of the SKCM cohort. **(L)** Stacked heatmap of immune-infiltrating immune cells in different clusters.


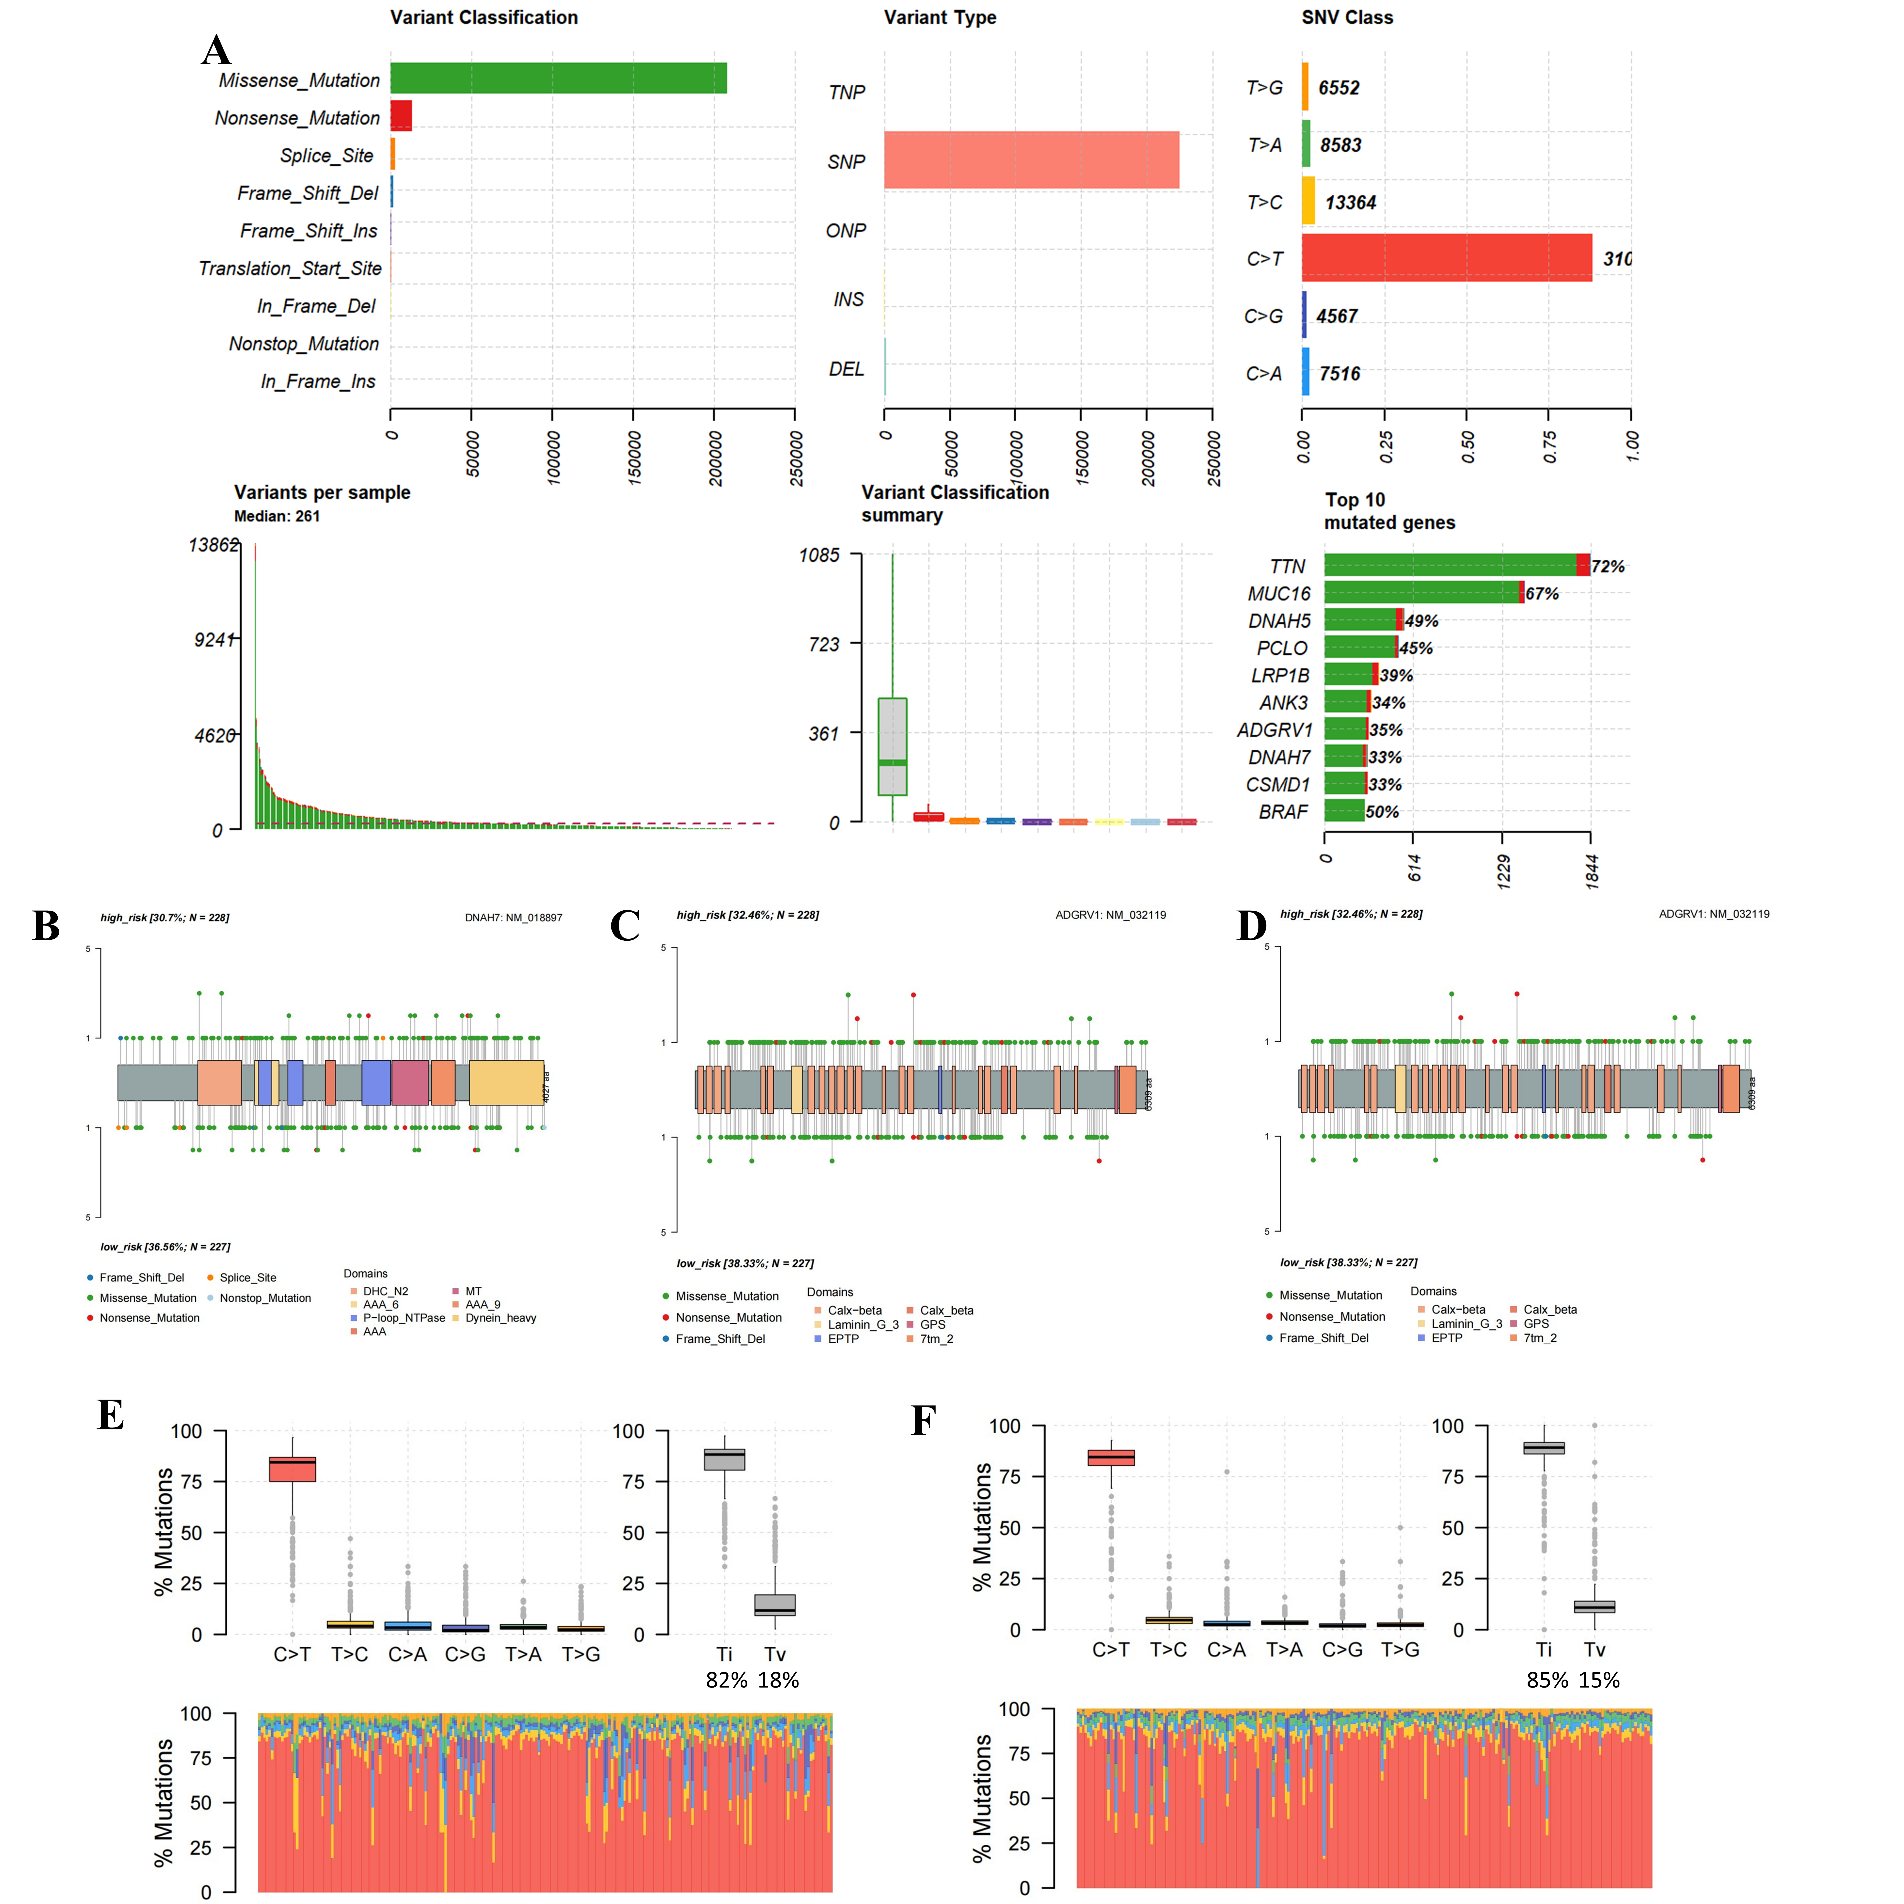


**Fig. S2.** Landscape of TMB, single gene mutation visualization, transition and transversion situations.

**(A)** Landscape of mutations across all samples. **(B-D)** Single gene mutation visualization for DNAH7 **(B)**, ADGRV1 **(C)**, and BRAF **(D)**. **(E)** The transition and transversion situations in high-risk groups. **(F)** The transition and transversion situations in low-risk groups.


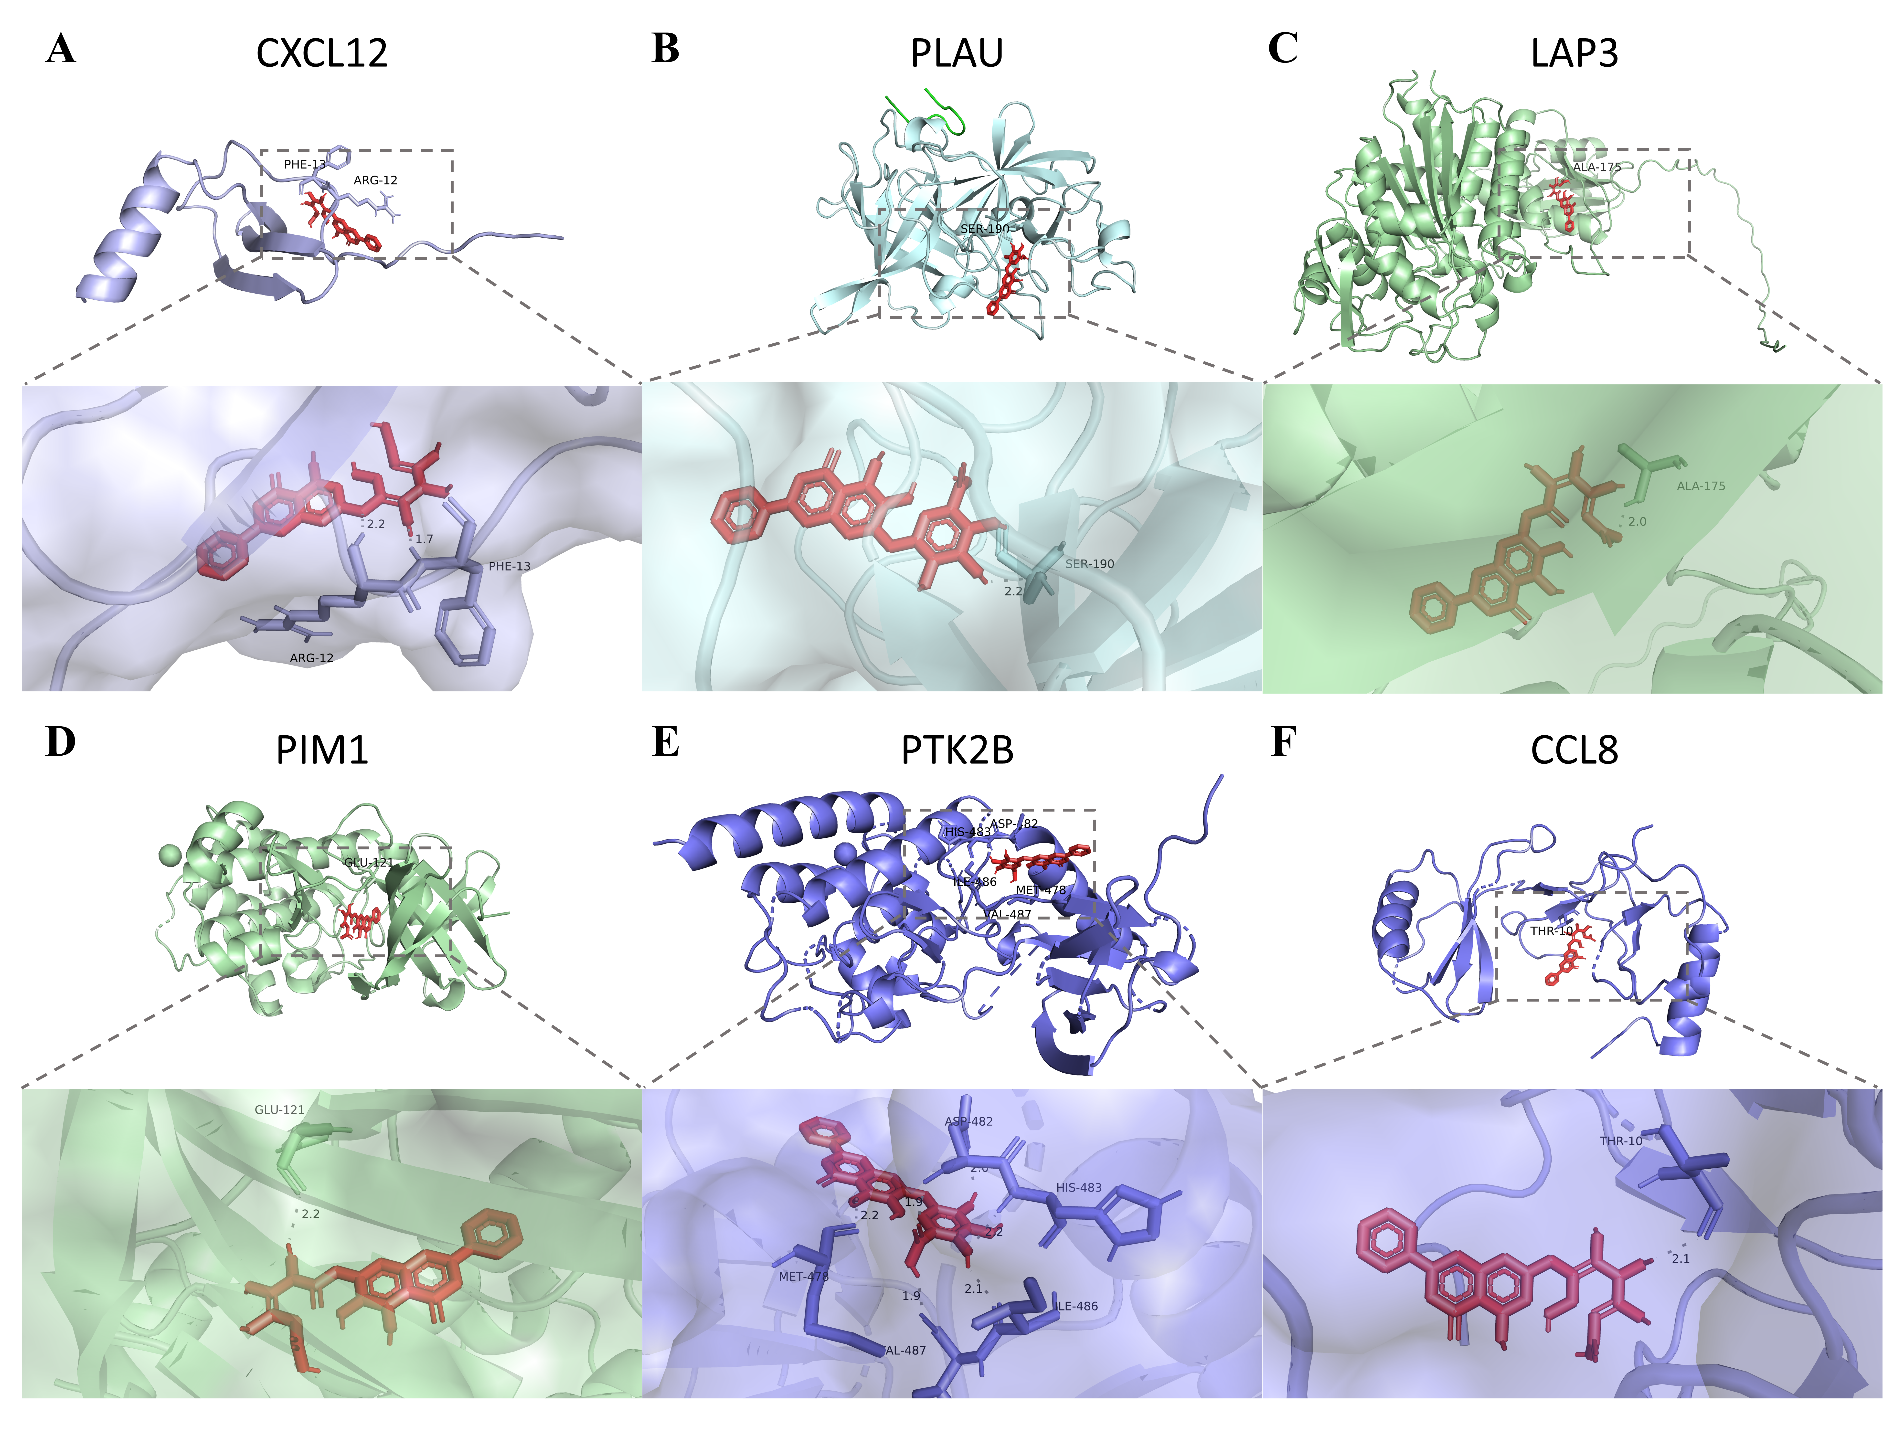


**Fig. S3.** Molecular docking results of the lowest binding energy in targets with the baicalin.

**(A)** CXCL12-baicalin. **(B)** PLAU-baicalin. **(C)** LAP3-baicalin. **(D)** PIM1-baicalin. **(E)** PTK2B -baicalin. **(F)** CCL8-baicalin.


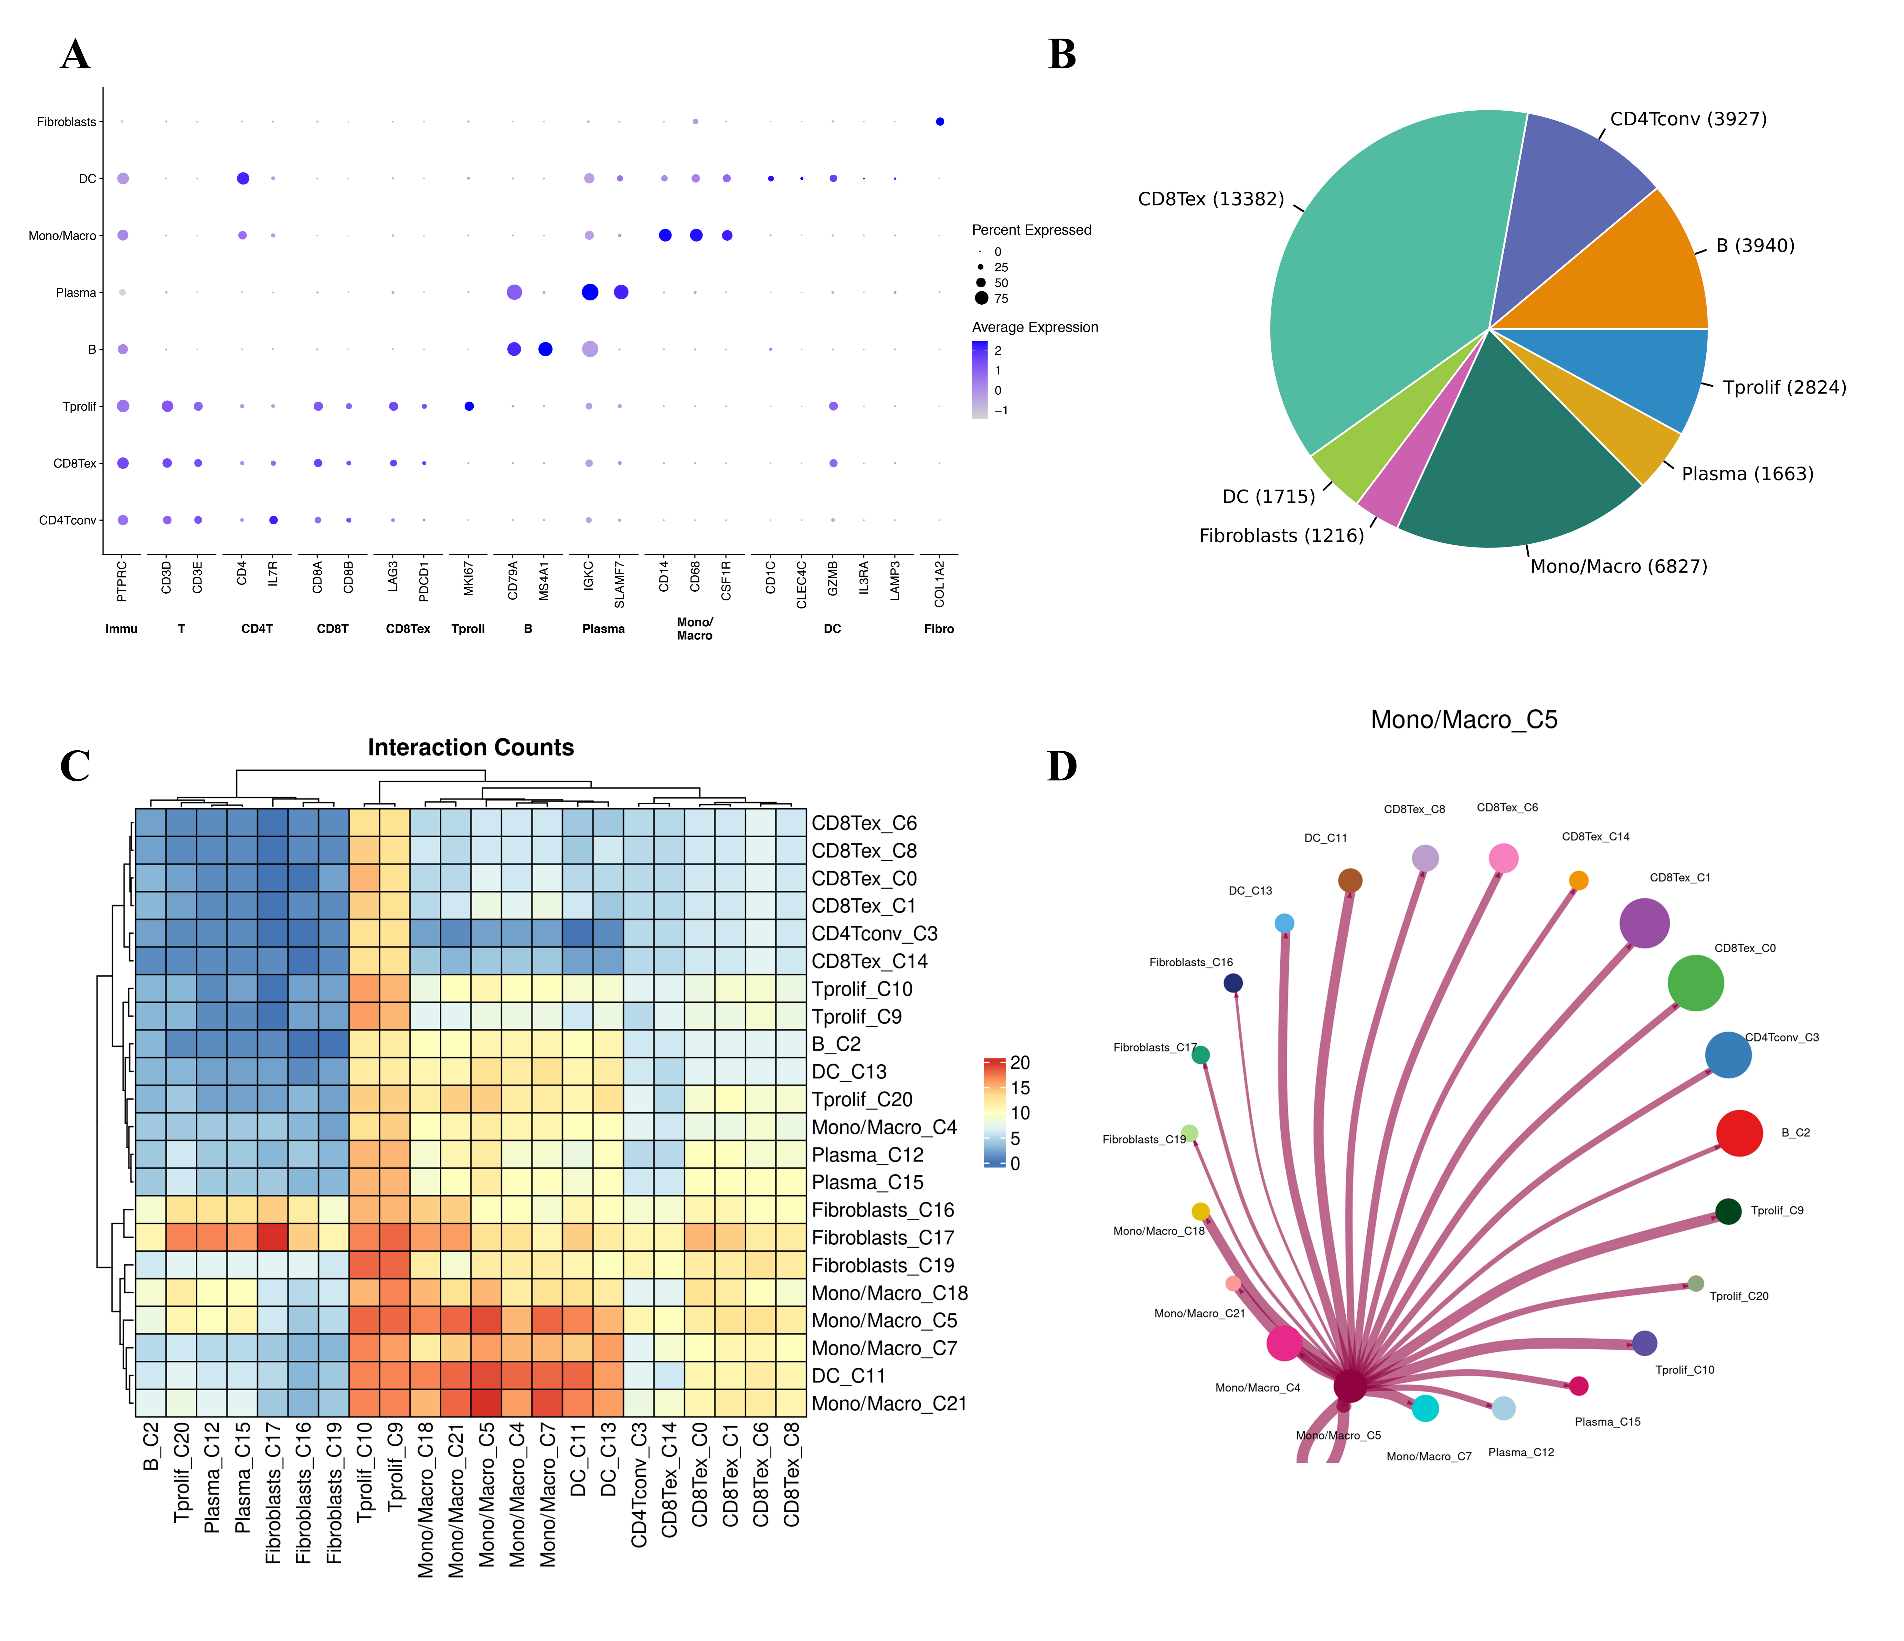


**Fig. S4.** The cell markers, proportion and the interaction analysis.

**(A)** Markers of the annotated immune cells. **(B)** The proportion of various immune cells in melanoma (GSE123139). **(C)** The heatmap of interaction counts between clusters. **(D)** The significant ligand-receptor pairs between mono/macro_C5 and other cell clusters. The edge width is proportional to the indicated number of ligand-receptor pairs.
